# Supplementary material for: SyntenyTracker: a tool for defining homologous synteny blocks using radiation hybrid maps and whole-genome sequence
Source: PubMed Central journal article supplement (PMC2726151; doi:10.1186/1756-0500-2-148), 2009-07-23
Supplement: 1756-0500-2-148-S2.pdf [file 1756-0500-2-148-S2.pdf]

Table 1. Comparison of HSAs defined manually, with SystemTracker and AutoGRAPH (Derrien et al., 2007) on the cattle-human radiation hybrid map dataset (Evans-van der Wind et al., 2005).

| Marker | order | HSA       | HSA_start | HSA_end  | Marker_name | CCAS1514 | CC475154 | BTA | BTA_start | BTA_end | HSB | Evts | vandW | Tracker | AutoGRAPH | Comment | Comment |
|--------|-------|-----------|-----------|----------|-------------|----------|----------|-----|-----------|---------|-----|------|-------|---------|-----------|---------|---------|
| 1      | 1     | 23818824  | 3301927   | BZ08854  | BZ08854     | BZ08854  | BZ08854  | 1   | 12        | 12      | 1   | 1    | 1     | 1       | 1         |         |         |
| 2      | 2     | 256218    | 3256313   | BZ02823  | BZ02823     | BZ02823  | BZ02823  | 1   | 40        | 40      | 1   | 1    | 1     | 1       | 1         |         |         |
| 3      | 3     | 3129899   | 3132050   | BZ08981  | BZ08981     | BZ08981  | BZ08981  | 1   | 43        | 43      | 1   | 1    | 1     | 1       | 1         |         |         |
| 4      | 4     | 3025703   | 3025736   | CC22891  | CC22891     | CC22891  | CC22891  | 1   | 46        | 46      | 1   | 1    | 1     | 1       | 1         |         |         |
| 5      | 5     | 2853152   | 2953688   | CC31314  | CC31314     | CC31314  | CC31314  | 1   | 53        | 53      | 1   | 1    | 1     | 1       | 1         |         |         |
| 6      | 6     | 2863907   | 2863946   | CC73677  | CC73677     | CC73677  | CC73677  | 1   | 56        | 56      | 1   | 1    | 1     | 1       | 1         |         |         |
| 7      | 7     | 2719477   | 2719517   | BZ05871  | BZ05871     | BZ05871  | BZ05871  | 1   | 56        | 56      | 1   | 1    | 1     | 1       | 1         |         |         |
| 8      | 8     | 2985166   | 2985342   | BZ02991  | BZ02991     | BZ02991  | BZ02991  | 1   | 56        | 56      | 1   | 1    | 1     | 1       | 1         |         |         |
| 9      | 9     | 2472788   | 2472756   | BZ03218  | BZ03218     | BZ03218  | BZ03218  | 1   | 76        | 76      | 1   | 1    | 1     | 1       | 1         |         |         |
| 10     | 10    | 2344241   | 2343306   | BZ07005  | BZ07005     | BZ07005  | BZ07005  | 1   | 79        | 79      | 1   | 1    | 1     | 1       | 1         |         |         |
| 11     | 11    | 2220896   | 2220956   | CC34886  | CC34886     | CC34886  | CC34886  | 1   | 79        | 79      | 1   | 1    | 1     | 1       | 1         |         |         |
| 12     | 12    | 2115220   | 2115271   | CC47920  | CC47920     | CC47920  | CC47920  | 1   | 82        | 82      | 1   | 1    | 1     | 1       | 1         |         |         |
| 13     | 13    | 2054234   | 2054534   | BZ07042  | BZ07042     | BZ07042  | BZ07042  | 1   | 82        | 82      | 1   | 1    | 1     | 1       | 1         |         |         |
| 14     | 14    | 1961515   | 1961565   | CC53925  | CC53925     | CC53925  | CC53925  | 1   | 106       | 106     | 1   | 1    | 1     | 1       | 1         |         |         |
| 15     | 15    | 1863972   | 1863793   | CC38018  | CC38018     | CC38018  | CC38018  | 1   | 110       | 110     | 1   | 1    | 1     | 1       | 1         |         |         |
| 16     | 16    | 1879602   | 1879243   | BZ06460  | BZ06460     | BZ06460  | BZ06460  | 1   | 116       | 116     | 1   | 1    | 1     | 1       | 1         |         |         |
| 17     | 17    | 1888071   | 1888098   | BZ05784  | BZ05784     | BZ05784  | BZ05784  | 1   | 113       | 113     | 1   | 1    | 1     | 1       | 1         |         |         |
| 18     | 18    | 1473654   | 1473678   | CC48525  | CC48525     | CC48525  | CC48525  | 1   | 140       | 140     | 1   | 1    | 1     | 1       | 1         |         |         |
| 19     | 19    | 1447358   | 1447328   | BZ04230  | BZ04230     | BZ04230  | BZ04230  | 1   | 144       | 144     | 1   | 1    | 1     | 1       | 1         |         |         |
| 20     | 20    | 7640203   | 7640238   | BZ09904  | BZ09904     | BZ09904  | BZ09904  | 1   | 158       | 158     | 1   | 1    | 1     | 1       | 1         |         |         |
| 21     | 21    | 7749353   | 7749374   | AW63888  | AW63888     | AW63888  | AW63888  | 1   | 172       | 172     | 2   | 2    | 2     | 2       | 2         |         |         |
| 22     | 22    | 7844658   | 7844671   | BZ02388  | BZ02388     | BZ02388  | BZ02388  | 1   | 172       | 172     | 2   | 2    | 2     | 2       | 2         |         |         |
| 23     | 23    | 7900395   | 7900804   | BZ01636  | BZ01636     | BZ01636  | BZ01636  | 1   | 179       | 179     | 2   | 2    | 2     | 2       | 2         |         |         |
| 24     | 24    | 8037626   | 8037601   | BZ06406  | BZ06406     | BZ06406  | BZ06406  | 1   | 190       | 190     | 2   | 2    | 2     | 2       | 2         |         |         |
| 25     | 25    | 8164631   | 8164665   | BZ05659  | BZ05659     | BZ05659  | BZ05659  | 1   | 210       | 210     | 2   | 2    | 2     | 2       | 2         |         |         |
| 26     | 26    | 8269360   | 8269738   | BZ03143  | BZ03143     | BZ03143  | BZ03143  | 1   | 230       | 230     | 2   | 2    | 2     | 2       | 2         |         |         |
| 27     | 27    | 8378951   | 8379551   | BZ01936  | BZ01936     | BZ01936  | BZ01936  | 1   | 252       | 252     | 2   | 2    | 2     | 2       | 2         |         |         |
| 28     | 28    | 8398614   | 8398627   | CC42704  | CC42704     | CC42704  | CC42704  | 1   | 252       | 252     | 2   | 2    | 2     | 2       | 2         |         |         |
| 29     | 29    | 8215902   | 8216070   | BZ02016  | BZ02016     | BZ02016  | BZ02016  | 1   | 270       | 270     | 2   | 2    | 2     | 2       | 2         |         |         |
| 30     | 30    | 8649523   | 8649166   | BZ05163  | BZ05163     | BZ05163  | BZ05163  | 1   | 287       | 287     | 2   | 2    | 2     | 2       | 2         |         |         |
| 31     | 31    | 87391643  | 87391947  | X12657   | X12657      | X12657   | X12657   | 1   | 295       | 295     | 2   | 2    | 2     | 2       | 2         |         |         |
| 32     | 32    | 8856289   | 8856877   | BZ03336  | BZ03336     | BZ03336  | BZ03336  | 1   | 302       | 302     | 2   | 2    | 2     | 2       | 2         |         |         |
| 33     | 33    | 9005745   | 9005187   | BZ06059  | BZ06059     | BZ06059  | BZ06059  | 1   | 302       | 302     | 2   | 2    | 2     | 2       | 2         |         |         |
| 34     | 34    | 9057472   | 9057942   | X12901   | X12901      | X12901   | X12901   | 1   | 306       | 306     | 2   | 2    | 2     | 2       | 2         |         |         |
| 35     | 35    | 9599169   | 9599176   | BZ09514  | BZ09514     | BZ09514  | BZ09514  | 1   | 310       | 310     | 2   | 2    | 2     | 2       | 2         |         |         |
| 36     | 36    | 9670658   | 9670731   | CC31970  | CC31970     | CC31970  | CC31970  | 1   | 310       | 310     | 2   | 2    | 2     | 2       | 2         |         |         |
| 37     | 37    | 9770716   | 9770715   | BZ09609  | BZ09609     | BZ09609  | BZ09609  | 1   | 314       | 314     | 2   | 2    | 2     | 2       | 2         |         |         |
| 38     | 38    | 9800636   | 9800583   | BZ02063  | BZ02063     | BZ02063  | BZ02063  | 1   | 314       | 314     | 2   | 2    | 2     | 2       | 2         |         |         |
| 39     | 39    | 9976469   | 9977005   | BZ04534  | BZ04534     | BZ04534  | BZ04534  | 1   | 318       | 318     | 2   | 2    | 2     | 2       | 2         |         |         |
| 40     | 40    | 10084087  | 10084504  | BZ02231  | BZ02231     | BZ02231  | BZ02231  | 1   | 326       | 326     | 2   | 2    | 2     | 2       | 2         |         |         |
| 41     | 41    | 10189188  | 10189637  | BZ04924  | BZ04924     | BZ04924  | BZ04924  | 1   | 329       | 329     | 2   | 2    | 2     | 2       | 2         |         |         |
| 42     | 42    | 10303609  | 10303585  | BZ09633  | BZ09633     | BZ09633  | BZ09633  | 1   | 333       | 333     | 2   | 2    | 2     | 2       | 2         |         |         |
| 43     | 43    | 10408922  | 10408278  | BZ04364  | BZ04364     | BZ04364  | BZ04364  | 1   | 333       | 333     | 2   | 2    | 2     | 2       | 2         |         |         |
| 44     | 44    | 10589832  | 1059017   | BZ01743  | BZ01743     | BZ01743  | BZ01743  | 1   | 333       | 333     | 2   | 2    | 2     | 2       | 2         |         |         |
| 45     | 45    | 106813926 | 106814320 | BZ01082  | BZ01082     | BZ01082  | BZ01082  | 1   | 347       | 347     | 2   | 2    | 2     | 2       | 2         |         |         |
| 46     | 46    | 10806748  | 10807685  | BZ05101  | BZ05101     | BZ05101  | BZ05101  | 1   | 360       | 360     | 2   | 2    | 2     | 2       | 2         |         |         |
| 47     | 47    | 10901080  | 10911129  | AW32867  | AW32867     | AW32867  | AW32867  | 1   | 367       | 367     | 2   | 2    | 2     | 2       | 2         |         |         |
| 48     | 48    | 10968022  | 10968053  | BZ03805  | BZ03805     | BZ03805  | BZ03805  | 1   | 374       | 374     | 2   | 2    | 2     | 2       | 2         |         |         |
| 49     | 49    | 11057720  | 11057872  | BZ02952  | BZ02952     | BZ02952  | BZ02952  | 1   | 374       | 374     | 2   | 2    | 2     | 2       | 2         |         |         |
| 50     | 50    | 11195274  | 11195308  | BZ01043  | BZ01043     | BZ01043  | BZ01043  | 1   | 374       | 374     | 2   | 2    | 2     | 2       | 2         |         |         |
| 51     | 51    | 11285126  | 11285150  | AW28920  | AW28920     | AW28920  | AW28920  | 1   | 432       | 432     | 2   | 2    | 2     | 2       | 2         |         |         |
| 52     | 52    | 113840249 | 113840584 | BZ02071  | BZ02071     | BZ02071  | BZ02071  | 1   | 435       | 435     | 2   | 2    | 2     | 2       | 2         |         |         |
| 53     | 53    | 115104108 | 11510504  | BZ01675  | BZ01675     | BZ01675  | BZ01675  | 1   | 442       | 442     | 2   | 2    | 2     | 2       | 2         |         |         |
| 54     | 54    | 116254637 | 11624797  | BZ02772  | BZ02772     | BZ02772  | BZ02772  | 1   | 453       | 453     | 2   | 2    | 2     | 2       | 2         |         |         |
| 55     | 55    | 117541236 | 11741464  | BZ04569  | BZ04569     | BZ04569  | BZ04569  | 1   | 458       | 458     | 2   | 2    | 2     | 2       | 2         |         |         |
| 56     | 56    | 118474552 | 118474682 | BZ03478  | BZ03478     | BZ03478  | BZ03478  | 1   | 458       | 458     | 2   | 2    | 2     | 2       | 2         |         |         |
| 57     | 57    | 119539139 | 11953968  | BZ03095  | BZ03095     | BZ03095  | BZ03095  | 1   | 464       | 464     | 2   | 2    | 2     | 2       | 2         |         |         |
| 58     | 58    | 120585697 | 120585745 | BZ04972  | BZ04972     | BZ04972  | BZ04972  | 1   | 466       | 466     | 2   | 2    | 2     | 2       | 2         |         |         |
| 59     | 59    | 12087134  | 12087147  | AW28925  | AW28925     | AW28925  | AW28925  | 1   | 466       | 466     | 2   | 2    | 2     | 2       | 2         |         |         |
| 60     | 60    | 12166580  | 12165560  | BZ02109  | BZ02109     | BZ02109  | BZ02109  | 1   | 469       | 469     | 2   | 2    | 2     | 2       | 2         |         |         |
| 61     | 61    | 12268726  | 12268826  | BZ03559  | BZ03559     | BZ03559  | BZ03559  | 1   | 475       | 475     | 2   | 2    | 2     | 2       | 2         |         |         |
| 62     | 62    | 123380971 | 123381064 | BZ02606  | BZ02606     | BZ02606  | BZ02606  | 1   | 477       | 477     | 2   | 2    | 2     | 2       | 2         |         |         |
| 63     | 63    | 12313967  | 12314091  | BF44029  | BF44029     | BF44029  | BF44029  | 1   | 477       | 477     | 2   | 2    | 2     | 2       | 2         |         |         |
| 64     | 64    | 12420178  | 12420166  | AW28973  | AW28973     | AW28973  | AW28973  | 1   | 477       | 477     | 2   | 2    | 2     | 2       | 2         |         |         |
| 65     | 65    | 125424098 | 125424189 | BZ051965 | BZ051965    | BZ051965 | BZ051965 | 1   | 488       | 488     | 2   | 2    | 2     | 2       | 2         |         |         |
| 66     | 66    | 126179249 | 12617996  | AW28928  | AW28928     | AW28928  | AW28928  | 1   | 494       | 494     | 2   | 2    | 2     | 2       | 2         |         |         |
| 67     | 67    | 126740087 | 12674084  | BZ01166  | BZ01166     | BZ01166  | BZ01166  | 1   | 502       | 502     | 2   | 2    | 2     | 2       | 2         |         |         |
| 68     | 68    | 19872213  | 19872752  | BZ08764  | BZ08764     | BZ08764  | BZ08764  | 1   | 509       | 509     | 3   | 3    | 3     | 3       | 3         |         |         |
| 69     | 69    | 19814897  | 1981497   | AW28927  | AW28927     | AW28927  | AW28927  | 1   | 509       | 509     | 3   | 3    | 3     | 3       | 3         |         |         |
| 70     | 70    | 19747572  | 1974771   | BZ09608  | BZ09608     | BZ09608  | BZ09608  | 1   | 512       | 512     | 3   | 3    | 3     | 3       | 3         |         |         |
| 71     | 71    | 19672729  | 19672862  | AW315482 | AW315482    | AW315482 | AW315482 | 1   | 514       | 514     | 3   | 3    | 3     | 3       | 3         |         |         |
| 72     | 72    | 19632813  | 19632697  | BZ04383  | BZ04383     | BZ04383  | BZ04383  | 1   | 517       | 517     | 3   | 3    | 3     | 3       | 3         |         |         |
| 73     | 73    | 19517638  | 19517665  | BZ02156  | BZ02156     | BZ02156  | BZ02156  | 1   | 517       | 517     | 3   | 3    | 3     | 3       | 3         |         |         |
| 74     | 74    | 19441949  | 19441956  | BZ09001  | BZ09001     | BZ09001  | BZ09001  | 1   | 517       | 517     | 3   | 3    | 3     | 3       | 3         |         |         |
| 75     | 75    | 19349698  | 19349664  | BZ02522  | BZ02522     | BZ02522  | BZ02522  | 1   | 517       | 517     | 3   | 3    | 3     | 3       | 3         |         |         |
| 76     | 76    | 19246304  | 19246305  | BZ02483  | BZ02483     | BZ02483  | BZ02483  | 1   | 519       | 519     | 3   | 3    | 3     | 3       | 3         |         |         |
| 77     | 77    | 19104472  | 19103577  | BZ04629  | BZ04629     | BZ04629  | BZ04629  | 1   | 525       | 525     | 3   | 3    | 3     | 3       | 3         |         |         |
| 78     | 78    | 19037306  | 19037308  | BZ02027  | BZ02027     | BZ02027  | BZ02027  | 1   | 527       | 527     | 3   | 3    | 3     | 3       | 3         |         |         |
| 79     | 79    | 18940957  | 189401007 | BZ01844  | BZ01844     | BZ01844  | BZ01844  | 1   | 572       | 572     | 3   | 3    | 3     | 3       | 3         |         |         |
| 80     | 80    | 18819878  | 18818841  | BZ01694  | BZ01694     | BZ01694  | BZ01694  | 1   | 579       | 579     | 3   | 3    | 3     | 3       | 3         |         |         |
| 81     | 81    | 18751628  | 18751841  | X16577   | X16577      | X16577   | X16577   | 1   | 579       | 579     | 3   | 3    | 3     | 3       | 3         |         |         |
| 82     | 82    | 18642392  | 18642416  | BZ01112  | BZ01112     | BZ01112  | BZ01112  | 1   | 581       | 581     | 3   | 3    | 3     | 3       | 3         |         |         |

|     |   |             |           |          |          |          |   |      |      |    |    |    |
|-----|---|-------------|-----------|----------|----------|----------|---|------|------|----|----|----|
| 254 | 2 | 119791265   | 119791334 | CC91613  | CC91613  | CC91613  | 2 | 702  | 702  | 14 | 14 | 10 |
| 255 | 2 | 12109477    | 12109484  | BZ09417  | BZ09417  | BZ09417  | 2 | 702  | 702  | 14 | 14 | 10 |
| 256 | 2 | 120824931   | 120825306 | AW669304 | AW669304 | AW669304 | 2 | 702  | 702  | 14 | 14 | 10 |
| 257 | 2 | 121065463   | 121065571 | BZ25702  | BZ25702  | BZ25702  | 2 | 702  | 702  | 14 | 14 | 10 |
| 258 | 2 | 122669374   | 122669521 | CC533374 | CC533374 | CC533374 | 2 | 715  | 715  | 14 | 14 | 10 |
| 259 | 2 | 122978146   | 122978540 | BZ048549 | BZ048549 | BZ048549 | 2 | 715  | 715  | 14 | 14 | 10 |
| 260 | 2 | 124504005   | 124506072 | BZ885291 | BZ885291 | BZ885291 | 2 | 728  | 728  | 14 | 14 | 10 |
| 261 | 2 | 124559007   | 124561074 | BZ041667 | BZ041667 | BZ041667 | 2 | 734  | 734  | 14 | 14 | 10 |
| 262 | 2 | 126027434   | 126028084 | BZ045414 | BZ045414 | BZ045414 | 2 | 758  | 758  | 14 | 14 | 10 |
| 263 | 2 | 127152788   | 127153033 | CC769033 | CC769033 | CC769033 | 2 | 769  | 769  | 14 | 14 | 10 |
| 264 | 2 | 192242348   | 192242588 | BZ025299 | BZ025299 | BZ025299 | 2 | 805  | 805  | 15 | 15 | 11 |
| 265 | 2 | 193396323   | 193396343 | BZ032341 | BZ032341 | BZ032341 | 2 | 810  | 810  | 15 | 15 | 11 |
| 266 | 2 | 194651348   | 194651429 | CC477506 | CC477506 | CC477506 | 2 | 830  | 830  | 15 | 15 | 11 |
| 267 | 2 | 195288828   | 195290200 | BZ035576 | BZ035576 | BZ035576 | 2 | 830  | 830  | 15 | 15 | 11 |
| 268 | 2 | 196425890   | 196425994 | BZ025572 | BZ025572 | BZ025572 | 2 | 830  | 830  | 15 | 15 | 11 |
| 269 | 2 | 197676001   | 197677502 | AW289239 | AW289239 | AW289239 | 2 | 835  | 835  | 15 | 15 | 11 |
| 270 | 2 | 197732479   | 197732752 | BZ056433 | BZ056433 | BZ056433 | 2 | 840  | 840  | 15 | 15 | 11 |
| 271 | 2 | 198791950   | 198779695 | BZ044867 | BZ044867 | BZ044867 | 2 | 845  | 845  | 15 | 15 | 11 |
| 272 | 2 | 198778187   | 198779695 | BZ022169 | BZ022169 | BZ022169 | 2 | 845  | 845  | 15 | 15 | 11 |
| 273 | 2 | 200818604   | 200818902 | BZ019896 | BZ019896 | BZ019896 | 2 | 855  | 855  | 15 | 15 | 11 |
| 274 | 2 | 201547802   | 201548094 | AW289179 | AW289179 | AW289179 | 2 | 855  | 855  | 15 | 15 | 11 |
| 275 | 2 | 202218780   | 202218833 | BZ048460 | BZ048460 | BZ048460 | 2 | 860  | 860  | 15 | 15 | 11 |
| 276 | 2 | 204416859   | 204417247 | X03304   | X03304   | X03304   | 2 | 866  | 866  | 15 | 15 | 11 |
| 277 | 2 | 20329337    | 203295704 | BZ049214 | BZ049214 | BZ049214 | 2 | 871  | 871  | 15 | 15 | 11 |
| 279 | 2 | 20541001    | 20541097  | BZ047229 | BZ047229 | BZ047229 | 2 | 893  | 893  | 15 | 15 | 11 |
| 280 | 2 | 20649825    | 206498735 | CC474021 | CC474021 | CC474021 | 2 | 893  | 893  | 15 | 15 | 11 |
| 281 | 2 | 207522425   | 207522588 | BZ024812 | BZ024812 | BZ024812 | 2 | 893  | 893  | 15 | 15 | 11 |
| 282 | 2 | 208586072   | 208586322 | BZ059579 | BZ059579 | BZ059579 | 2 | 893  | 893  | 15 | 15 | 11 |
| 283 | 2 | 209198240   | 209198304 | BZ046290 | BZ046290 | BZ046290 | 2 | 897  | 897  | 15 | 15 | 11 |
| 284 | 2 | 210608881   | 210681306 | BZ070123 | BZ070123 | BZ070123 | 2 | 897  | 897  | 15 | 15 | 11 |
| 285 | 2 | 21106537    | 211066599 | BZ046502 | BZ046502 | BZ046502 | 2 | 902  | 902  | 15 | 15 | 11 |
| 286 | 2 | 212222847   | 212223113 | CC771713 | CC771713 | CC771713 | 2 | 916  | 916  | 15 | 15 | 11 |
| 287 | 2 | 213207825   | 213208361 | BZ014526 | BZ014526 | BZ014526 | 2 | 920  | 920  | 15 | 15 | 11 |
| 288 | 2 | 21493193    | 214933601 | BZ025641 | BZ025641 | BZ025641 | 2 | 941  | 941  | 15 | 15 | 11 |
| 289 | 2 | 214003195   | 214030816 | BZ023076 | BZ023076 | BZ023076 | 2 | 944  | 944  | 15 | 15 | 11 |
| 290 | 2 | 210072383   | 210072330 | CC447378 | CC447378 | CC447378 | 2 | 948  | 948  | 15 | 15 | 11 |
| 291 | 2 | 217288331   | 21728434  | BZ022604 | BZ022604 | BZ022604 | 2 | 948  | 948  | 15 | 15 | 11 |
| 292 | 2 | 218321201   | 21831612  | BZ097294 | BZ097294 | BZ097294 | 2 | 948  | 948  | 15 | 15 | 11 |
| 293 | 2 | 218854448   | 218854604 | U19947   | U19947   | U19947   | 2 | 951  | 951  | 15 | 15 | 11 |
| 294 | 2 | 21890633    | 21890835  | AW289209 | AW289209 | AW289209 | 2 | 955  | 955  | 15 | 15 | 11 |
| 295 | 2 | 219872690   | 219873034 | AW47613  | AW47613  | AW47613  | 2 | 963  | 963  | 15 | 15 | 11 |
| 296 | 2 | 22060102    | 22060699  | BZ010262 | BZ010262 | BZ010262 | 2 | 963  | 963  | 15 | 15 | 11 |
| 297 | 2 | 221609310   | 221609412 | BZ047191 | BZ047191 | BZ047191 | 2 | 970  | 970  | 15 | 15 | 11 |
| 298 | 2 | 222688344   | 22268976  | BZ008871 | BZ008871 | BZ008871 | 2 | 970  | 970  | 15 | 15 | 11 |
| 299 | 2 | 223746859   | 223747966 | BZ048393 | BZ048393 | BZ048393 | 2 | 974  | 974  | 15 | 15 | 11 |
| 300 | 2 | 22457690    | 22458807  | AW47344  | AW47344  | AW47344  | 2 | 981  | 981  | 15 | 15 | 11 |
| 301 | 2 | 22510633    | 22510634  | BZ019600 | BZ019600 | BZ019600 | 2 | 981  | 981  | 15 | 15 | 11 |
| 302 | 2 | 22672898    | 22673277  | BZ023439 | BZ023439 | BZ023439 | 2 | 988  | 988  | 15 | 15 | 11 |
| 303 | 2 | 22722886    | 22722985  | BZ014460 | BZ014460 | BZ014460 | 2 | 988  | 988  | 15 | 15 | 11 |
| 304 | 2 | 228176571   | 228176788 | BZ054904 | BZ054904 | BZ054904 | 2 | 999  | 999  | 15 | 15 | 11 |
| 305 | 2 | 22961000    | 229631569 | BZ002874 | BZ002874 | BZ002874 | 2 | 1007 | 1007 | 15 | 15 | 11 |
| 306 | 2 | 23060709    | 23060836  | BZ034427 | BZ034427 | BZ034427 | 2 | 1007 | 1007 | 15 | 15 | 11 |
| 307 | 2 | 231751458   | 231751560 | BZ017471 | BZ017471 | BZ017471 | 2 | 1013 | 1013 | 15 | 15 | 11 |
| 308 | 2 | 23278808    | 23278912  | CC330665 | CC330665 | CC330665 | 2 | 1034 | 1034 | 15 | 15 | 11 |
| 309 | 2 | 23262497    | 23264772  | BZ024912 | BZ024912 | BZ024912 | 2 | 1059 | 1059 | 16 | 16 | 12 |
| 310 | 2 | 23042949    | 23043595  | AW289350 | AW289350 | AW289350 | 2 | 1074 | 1074 | 16 | 16 | 12 |
| 311 | 2 | 31147495    | 31147727  | BZ014861 | BZ014861 | BZ014861 | 2 | 1074 | 1077 | 16 | 16 | 12 |
| 312 | 2 | 30874410    | 30874972  | AW428607 | AW428607 | AW428607 | 2 | 1077 | 1077 | 16 | 16 | 12 |
| 313 | 2 | 29704460    | 29704660  | CC338666 | CC338666 | CC338666 | 2 | 1077 | 1077 | 16 | 16 | 12 |
| 314 | 2 | 29260271    | 29260475  | BZ019725 | BZ019725 | BZ019725 | 2 | 1080 | 1080 | 16 | 16 | 12 |
| 315 | 2 | 28246998    | 28247210  | BZ048644 | BZ048644 | BZ048644 | 2 | 1080 | 1080 | 16 | 16 | 12 |
| 316 | 2 | 27309422    | 27309699  | BZ042423 | BZ042423 | BZ042423 | 2 | 1087 | 1087 | 16 | 16 | 12 |
| 317 | 2 | 26953516    | 26953698  | AW437332 | AW437332 | AW437332 | 2 | 1090 | 1090 | 16 | 16 | 12 |
| 318 | 2 | 26323668    | 26323027  | AW289302 | AW289302 | AW289302 | 2 | 1090 | 1090 | 16 | 16 | 12 |
| 319 | 2 | 25703230    | 25703354  | BZ044434 | BZ044434 | BZ044434 | 2 | 1097 | 1097 | 16 | 16 | 12 |
| 320 | 2 | 24413849    | 24414157  | BZ040416 | BZ040416 | BZ040416 | 2 | 1120 | 1120 | 16 | 16 | 12 |
| 322 | 2 | 23291023    | 23291485  | BZ014597 | BZ014597 | BZ014597 | 2 | 1143 | 1143 | 16 | 16 | 12 |
| 323 | 2 | 22719467    | 22719782  | AW289232 | AW289232 | AW289232 | 2 | 1148 | 1148 | 16 | 16 | 12 |
| 324 | 2 | 22163451    | 22163451  | AW261138 | AW261138 | AW261138 | 2 | 1163 | 1163 | 16 | 16 | 12 |
| 325 | 2 | 21122609    | 21122899  | CC331371 | CC331371 | CC331371 | 2 | 1172 | 1172 | 16 | 16 | 12 |
| 327 | 2 | 20050168    | 20050248  | BZ021605 | BZ021605 | BZ021605 | 2 | 1178 | 1178 | 16 | 16 | 12 |
| 328 | 2 | 19232873    | 19232995  | BZ024433 | BZ024433 | BZ024433 | 2 | 1187 | 1187 | 16 | 16 | 12 |
| 329 | 2 | 18209422    | 18209574  | BZ054082 | BZ054082 | BZ054082 | 2 | 1190 | 1190 | 16 | 16 | 12 |
| 330 | 2 | 17046307    | 17046417  | S68064   | S68064   | S68064   | 2 | 1190 | 1190 | 16 | 16 | 12 |
| 331 | 2 | 16466627    | 16466876  | AW482123 | AW482123 | AW482123 | 2 | 0    | 0    | 17 | 17 | 13 |
| 332 | 2 | 164217038   | 164217858 | BZ023861 | BZ023861 | BZ023861 | 2 | 7    | 7    | 17 | 17 | 13 |
| 333 | 2 | 16319089    | 16319313  | BZ030502 | BZ030502 | BZ030502 | 2 | 7    | 7    | 17 | 17 | 13 |
| 334 | 2 | 162252311   | 162252930 | BZ031498 | BZ031498 | BZ031498 | 2 | 13   | 13   | 17 | 17 | 13 |
| 335 | 2 | 16100897    | 16101215  | BZ024794 | BZ024794 | BZ024794 | 2 | 23   | 23   | 17 | 17 | 13 |
| 336 | 2 | 160028086   | 160028308 | BZ049113 | BZ049113 | BZ049113 | 2 | 34   | 34   | 17 | 17 | 13 |
| 337 | 2 | 159301042   | 159301285 | BE117503 | BE117503 | BE117503 | 2 | 42   | 42   | 17 | 17 | 13 |
| 338 | 2 | 158625193   | 158625236 | BZ017759 | BZ017759 | BZ017759 | 2 | 45   | 45   | 17 | 17 | 13 |
| 339 | 2 | 158572813   | 158573104 | X75671   | X75671   | X75671   | 2 | 45   | 45   | 17 | 17 | 13 |
| 340 | 2 | 15694160    | 15694249  | BE117553 | BE117553 | BE117553 | 2 | 58   | 58   | 17 | 17 | 13 |
| 342 | 2 | 15682820    | 15682888  | BZ010632 | BZ010632 | BZ010632 | 2 | 62   | 62   | 17 | 17 | 13 |
| 343 | 2 | 15561758    | 15561867  | BZ049355 | BZ049355 | BZ049355 | 2 | 66   | 66   | 17 | 17 | 13 |
| 344 | 2 | 154882695   | 154882763 | AW289420 | AW289420 | AW289420 | 2 | 70   | 70   | 17 | 17 | 13 |
| 345 | 2 | 154472857   | 154473100 | BZ025269 | BZ025269 | BZ025269 | 2 | 70   | 70   | 17 | 17 | 13 |
| 346 | 2 | 15345308    | 15345353  | X75867   | X75867   | X75867   | 2 | 96   | 96   | 17 | 17 | 13 |
| 348 | 2 | 15320089    | 15320349  | BZ045746 | BZ045746 | BZ045746 | 2 | 103  | 103  | 17 | 17 | 13 |
| 349 | 2 | 152128996   | 152129961 | BZ048493 | BZ048493 | BZ048493 | 2 | 114  | 114  | 17 | 17 | 13 |
| 350 | 2 | 15192272    | 151927950 | L41543   | L41543   | L41543   | 2 | 118  | 118  | 17 | 17 | 13 |
| 351 | 2 | 15174858    | 15174798  | AW289261 | AW289261 | AW289261 | 2 | 118  | 118  | 17 | 17 | 13 |
| 352 | 2 | 15097948    | 150979542 | CC447538 | CC447538 | CC447538 | 2 | 121  | 121  | 17 | 17 | 13 |
| 353 | 2 | 15032626    | 15032673  | D89656   | D89656   | D89656   | 2 | 121  | 121  | 17 | 17 | 13 |
| 354 | 2 | 15010067    | 15010144  | D49548   | D49548   | D49548   | 2 | 128  | 128  | 17 | 17 | 13 |
| 355 | 2 | 150204725   | 150204907 | D49550   | D49550   | D49550   | 2 | 131  | 131  | 17 | 17 | 13 |
| 356 | 2 | 14911713    | 149117215 | CC350079 | CC350079 | CC350079 | 2 | 140  | 140  | 17 | 17 | 13 |
| 357 | 2 | 148339948   | 148339948 | B64924   | B64924   | B64924   | 2 | 143  | 143  | 17 | 17 | 13 |
| 358 | 2 | 147750854</ |           |          |          |          |   |      |      |    |    |    |

|     |   |           |           |          |          |          |   |     |     |    |    |    |
|-----|---|-----------|-----------|----------|----------|----------|---|-----|-----|----|----|----|
| 507 | 7 | 10218395  | 10217919  | CC514109 | CC514109 | CC514109 | 4 | 131 | 131 | 22 | 21 | 17 |
| 508 | 7 | 11241762  | 11242077  | BZ209900 | BZ209900 | BZ209900 | 4 | 115 | 115 | 22 | 21 | 17 |
| 509 | 7 | 12439449  | 12439670  | D26549   | D26549   | D26549   | 4 | 154 | 154 | 22 | 21 | 17 |
| 510 | 7 | 12448645  | 12449101  | BZ201126 | BZ201126 | BZ201126 | 4 | 154 | 154 | 22 | 21 | 17 |
| 511 | 7 | 13534033  | 13534276  | BZ207900 | BZ207900 | BZ207900 | 4 | 161 | 161 | 22 | 21 | 17 |
| 512 | 7 | 14434076  | 14434294  | CC469592 | CC469592 | CC469592 | 4 | 167 | 167 | 22 | 21 | 17 |
| 513 | 7 | 15556303  | 15557077  | CC499795 | CC499795 | CC499795 | 4 | 174 | 174 | 22 | 21 | 17 |
| 514 | 7 | 16494039  | 16494288  | CC744889 | CC744889 | CC744889 | 4 | 174 | 174 | 22 | 21 | 17 |
| 515 | 7 | 1790984   | 1790984   | CC531188 | CC531188 | CC531188 | 4 | 184 | 184 | 22 | 21 | 17 |
| 516 | 7 | 1807648   | 1807913   | CC502226 | CC502226 | CC502226 | 4 | 190 | 190 | 22 | 21 | 17 |
| 517 | 7 | 19434658  | 19435114  | CC466397 | CC466397 | CC466397 | 4 | 190 | 190 | 22 | 21 | 17 |
| 518 | 7 | 19815165  | 20013842  | BZ010615 | BZ010615 | BZ010615 | 4 | 193 | 193 | 22 | 21 | 17 |
| 519 | 7 | 21578120  | 21578464  | BZ237067 | BZ237067 | BZ237067 | 4 | 196 | 196 | 22 | 21 | 17 |
| 520 | 7 | 22994904  | 22995053  | BZ248444 | BZ248444 | BZ248444 | 4 | 203 | 203 | 22 | 21 | 17 |
| 521 | 7 | 23330733  | 23330916  | AW209294 | AW209294 | AW209294 | 4 | 209 | 209 | 22 | 21 | 17 |
| 522 | 7 | 27110153  | 27110277  | CC514299 | CC514299 | CC514299 | 4 | 209 | 209 | 22 | 21 | 17 |
| 523 | 7 | 28840001  | 28840211  | BE217416 | BE217416 | BE217416 | 4 | 209 | 209 | 23 | 21 | 17 |
| 524 | 7 | 28653556  | 28653542  | L05745   | L05745   | L05745   | 4 | 209 | 209 | 23 | 21 | 17 |
| 525 | 7 | 2893834   | 28934166  | CC490427 | CC490427 | CC490427 | 4 | 216 | 216 | 23 | 21 | 17 |
| 526 | 7 | 28943403  | 28943676  | CC595041 | CC595041 | CC595041 | 4 | 219 | 219 | 23 | 21 | 17 |
| 527 | 7 | 28267884  | 28268567  | CC546970 | CC546970 | CC546970 | 4 | 219 | 219 | 23 | 21 | 17 |
| 528 | 7 | 21891195  | 21891425  | CC767620 | CC767620 | CC767620 | 4 | 219 | 219 | 23 | 21 | 17 |
| 529 | 7 | 28084544  | 28084987  | CC573716 | CC573716 | CC573716 | 4 | 225 | 225 | 23 | 21 | 17 |
| 530 | 7 | 29920604  | 29920846  | X01503   | X01503   | X01503   | 4 | 229 | 229 | 23 | 21 | 17 |
| 531 | 7 | 29780175  | 29780397  | CC541504 | CC541504 | CC541504 | 4 | 232 | 232 | 23 | 21 | 17 |
| 532 | 7 | 29491253  | 29493343  | X03642   | X03642   | X03642   | 4 | 236 | 236 | 23 | 21 | 17 |
| 533 | 7 | 28732525  | 28735580  | CC508041 | CC508041 | CC508041 | 4 | 236 | 236 | 23 | 21 | 17 |
| 534 | 7 | 27857317  | 27858098  | CC471384 | CC471384 | CC471384 | 4 | 236 | 236 | 23 | 21 | 17 |
| 535 | 7 | 24740454  | 24740544  | BZ264564 | BZ264564 | BZ264564 | 4 | 239 | 239 | 23 | 21 | 17 |
| 536 | 7 | 26772409  | 26772569  | BZ268341 | BZ268341 | BZ268341 | 4 | 243 | 243 | 23 | 21 | 17 |
| 537 | 7 | 102645521 | 10264681  | CC508340 | CC508340 | CC508340 | 4 | 254 | 254 | 24 | 21 | 17 |
| 538 | 7 | 10304073  | 10304207  | AW202117 | AW202117 | AW202117 | 4 | 257 | 257 | 24 | 21 | 17 |
| 539 | 7 | 103680256 | 103680720 | CC589195 | CC589195 | CC589195 | 4 | 261 | 261 | 24 | 21 | 17 |
| 540 | 7 | 10424631  | 10424868  | AW483805 | AW483805 | AW483805 | 4 | 275 | 275 | 24 | 21 | 17 |
| 541 | 7 | 10469224  | 10469814  | CC519712 | CC519712 | CC519712 | 4 | 278 | 278 | 24 | 21 | 17 |
| 542 | 7 | 10572693  | 10572751  | CC584898 | CC584898 | CC584898 | 4 | 285 | 285 | 24 | 21 | 17 |
| 543 | 7 | 106395231 | 10639586  | AW357054 | AW357054 | AW357054 | 4 | 285 | 285 | 24 | 21 | 17 |
| 544 | 7 | 116756326 | 11675698  | CC517995 | CC517995 | CC517995 | 4 | 292 | 292 | 24 | 21 | 17 |
| 545 | 7 | 116017303 | 116017495 | AW464296 | AW464296 | AW464296 | 4 | 295 | 295 | 24 | 21 | 17 |
| 546 | 7 | 115742701 | 115742901 | BZ014154 | BZ014154 | BZ014154 | 4 | 295 | 295 | 25 | 21 | 17 |
| 547 | 7 | 11472334  | 11472385  | BZ286868 | BZ286868 | BZ286868 | 4 | 295 | 295 | 25 | 21 | 17 |
| 548 | 7 | 113786232 | 11378692  | CC532890 | CC532890 | CC532890 | 4 | 299 | 299 | 25 | 21 | 17 |
| 549 | 7 | 11205158  | 112053805 | AW289361 | AW289361 | AW289361 | 4 | 302 | 302 | 24 | 21 | 17 |
| 550 | 7 | 11206159  | 11206568  | CC534797 | CC534797 | CC534797 | 4 | 306 | 306 | 24 | 21 | 17 |
| 551 | 7 | 11194559  | 11194922  | BZ207910 | BZ207910 | BZ207910 | 4 | 330 | 330 | 25 | 21 | 17 |
| 552 | 7 | 11084185  | 11084110  | CC516947 | CC516947 | CC516947 | 4 | 343 | 343 | 24 | 21 | 17 |
| 553 | 7 | 10984649  | 10984686  | CC498153 | CC498153 | CC498153 | 4 | 347 | 347 | 24 | 21 | 17 |
| 554 | 7 | 10883742  | 108839124 | CC500413 | CC500413 | CC500413 | 4 | 347 | 347 | 25 | 21 | 17 |
| 555 | 7 | 10780342  | 10780370  | CC774120 | CC774120 | CC774120 | 4 | 359 | 359 | 25 | 21 | 17 |
| 556 | 7 | 37128596  | 37129042  | BZ047997 | BZ047997 | BZ047997 | 4 | 377 | 377 | 26 | 21 | 17 |
| 557 | 7 | 36218995  | 36219288  | BZ263307 | BZ263307 | BZ263307 | 4 | 380 | 380 | 26 | 21 | 17 |
| 558 | 7 | 35254975  | 35255289  | BZ200805 | BZ200805 | BZ200805 | 4 | 384 | 384 | 26 | 21 | 17 |
| 559 | 7 | 34591283  | 34591668  | CC510473 | CC510473 | CC510473 | 4 | 384 | 384 | 26 | 21 | 17 |
| 560 | 7 | 33774887  | 33775089  | BZ202674 | BZ202674 | BZ202674 | 4 | 387 | 387 | 26 | 21 | 17 |
| 561 | 7 | 32184262  | 32184963  | CC533615 | CC533615 | CC533615 | 4 | 387 | 387 | 26 | 21 | 17 |
| 562 | 7 | 31442530  | 31442550  | BZ203515 | BZ203515 | BZ203515 | 4 | 387 | 387 | 26 | 21 | 17 |
| 563 | 7 | 30919253  | 30919423  | CC560273 | CC560273 | CC560273 | 4 | 394 | 394 | 26 | 21 | 17 |
| 564 | 7 | 29993693  | 29994195  | CC509534 | CC509534 | CC509534 | 4 | 414 | 414 | 26 | 21 | 17 |
| 565 | 7 | 28606839  | 28607317  | CC517191 | CC517191 | CC517191 | 4 | 418 | 418 | 26 | 21 | 17 |
| 566 | 7 | 28111367  | 28111627  | BZ252153 | BZ252153 | BZ252153 | 4 | 422 | 422 | 26 | 21 | 17 |
| 567 | 7 | 27076759  | 27076980  | BZ09169  | BZ09169  | BZ09169  | 4 | 427 | 427 | 26 | 21 | 17 |
| 568 | 7 | 26106259  | 26106494  | AW346369 | AW346369 | AW346369 | 4 | 431 | 431 | 26 | 21 | 17 |
| 569 | 7 | 2608442   | 26085672  | CC503269 | CC503269 | CC503269 | 4 | 436 | 436 | 26 | 21 | 17 |
| 570 | 7 | 23866994  | 23867086  | BZ041133 | BZ041133 | BZ041133 | 4 | 450 | 450 | 26 | 21 | 17 |
| 571 | 7 | 23812820  | 23812918  | CC529242 | CC529242 | CC529242 | 4 | 454 | 454 | 27 | 21 | 17 |
| 572 | 7 | 23812820  | 23812918  | CC529242 | CC529242 | CC529242 | 4 | 454 | 454 | 27 | 21 | 17 |
| 573 | 7 | 23812820  | 23812918  | CC529242 | CC529242 | CC529242 | 4 | 454 | 454 | 27 | 21 | 17 |
| 574 | 7 | 4682676   | 4683378   | BZ271449 | BZ271449 | BZ271449 | 4 | 465 | 465 | 26 | 21 | 17 |
| 575 | 7 | 4572376   | 45724088  | M76478   | M76478   | M76478   | 4 | 465 | 465 | 26 | 21 | 17 |
| 576 | 7 | 4572376   | 45724088  | M76478   | M76478   | M76478   | 4 | 465 | 465 | 26 | 21 | 17 |
| 577 | 7 | 4572376   | 45724088  | M76478   | M76478   | M76478   | 4 | 465 | 465 | 26 | 21 | 17 |
| 578 | 7 | 4572376   | 45724088  | M76478   | M76478   | M76478   | 4 | 465 | 465 | 26 | 21 | 17 |
| 579 | 7 | 4572376   | 45724088  | M76478   | M76478   | M76478   | 4 | 465 | 465 | 26 | 21 | 17 |
| 580 | 7 | 44914085  | 44914239  | CC523866 | CC523866 | CC523866 | 4 | 469 | 469 | 28 | 21 | 17 |
| 581 | 7 | 4386344   | 4386352   | CC771434 | CC771434 | CC771434 | 4 | 473 | 473 | 28 | 21 | 17 |
| 582 | 7 | 42505678  | 42506230  | BZ018094 | BZ018094 | BZ018094 | 4 | 485 | 485 | 27 | 21 | 17 |
| 583 | 7 | 41938189  | 41938603  | BZ273654 | BZ273654 | BZ273654 | 4 | 497 | 497 | 28 | 21 | 17 |
| 584 | 7 | 40810661  | 40811081  | CC593826 | CC593826 | CC593826 | 4 | 497 | 497 | 28 | 21 | 17 |
| 585 | 7 | 39814634  | 39815012  | CC490627 | CC490627 | CC490627 | 4 | 501 | 501 | 29 | 21 | 17 |
| 586 | 7 | 38925632  | 38925988  | BZ036282 | BZ036282 | BZ036282 | 4 | 501 | 501 | 29 | 21 | 17 |
| 587 | 7 | 31797966  | 31798046  | CC479182 | CC479182 | CC479182 | 4 | 523 | 523 | 29 | 21 | 17 |
| 588 | 7 | 31874111  | 31874117  | BZ268117 | BZ268117 | BZ268117 | 4 | 538 | 538 | 29 | 21 | 17 |
| 589 | 7 | 31992558  | 31993040  | BZ269066 | BZ269066 | BZ269066 | 4 | 557 | 557 | 29 | 21 | 17 |
| 590 | 7 | 12097267  | 12097268  | BZ276586 | BZ276586 | BZ276586 | 4 | 565 | 565 | 28 | 21 | 17 |
| 591 | 7 | 12124916  | 12124999  | AW430276 | AW430276 | AW430276 | 4 | 569 | 569 | 29 | 21 | 17 |
| 592 | 7 | 12280313  | 12280296  | CC492581 | CC492581 | CC492581 | 4 | 574 | 574 | 28 | 21 | 17 |
| 593 | 7 | 122199330 | 122199517 | CC497750 | CC497750 | CC497750 | 4 | 583 | 583 | 28 | 21 | 17 |
| 594 | 7 | 12282097  | 122830173 | BZ01102  | BZ01102  | BZ01102  | 4 | 599 | 599 | 29 | 21 | 17 |
| 595 | 7 | 12349182  | 12349282  | CC530547 | CC530547 | CC530547 | 4 | 617 | 617 | 29 | 21 | 17 |
| 596 | 7 | 125874002 | 125874068 | BZ051950 | BZ051950 | BZ051950 | 4 | 628 | 628 | 29 | 21 | 17 |
| 597 | 7 | 12712286  | 127123164 | CC547739 | CC547739 | CC547739 | 4 | 643 | 643 | 29 | 21 | 17 |
| 598 | 7 | 12809396  | 12809669  | AW267076 | AW267076 | AW267076 | 4 | 667 | 667 | 29 | 21 | 17 |
| 599 | 7 | 12906423  | 12906488  | AW289176 | AW289176 | AW289176 | 4 | 671 | 671 | 29 | 21 | 17 |
| 600 | 7 | 129184438 | 129184733 | BZ262656 | BZ262656 | BZ262656 | 4 | 675 | 675 | 29 | 21 | 17 |
| 601 | 7 | 12921018  | 12921879  | M81851   | M81851   | M81851   | 4 | 679 | 679 | 29 | 21 | 17 |
| 602 | 7 | 13014622  | 130137154 | CC546178 | CC546178 | CC546178 | 4 | 690 | 690 | 29 | 21 | 17 |
| 603 | 7 | 13107128  | 131072061 | CC560915 | CC560915 | CC560915 | 4 | 690 | 690 | 29 | 21 | 17 |
| 604 | 7 | 13206288  | 13206257  | CC500550 | CC500550 | CC500550 | 4 | 690 | 690 | 29 | 21 | 17 |
| 605 | 7 | 13132428  | 13132979  | BZ045646 | BZ045646 | BZ045646 | 4 | 694 | 694 | 29 | 21 | 17 |
| 606 | 7 | 13406302  | 13406477  | CC582448 | CC582448 | CC582448 | 4 | 712 | 712 | 29 | 21 | 17 |
| 6   |   |           |           |          |          |          |   |     |     |    |    |    |

|     |    |           |           |          |          |          |   |     |     |    |    |    |
|-----|----|-----------|-----------|----------|----------|----------|---|-----|-----|----|----|----|
| 774 | 12 | 11931993  | 11932376  | CC92988  | CC92988  | CC92988  | 5 | 639 | 639 | 35 | 34 | 29 |
| 775 | 12 | 11092620  | 11093680  | BZ21380  | BZ21380  | BZ21380  | 5 | 639 | 639 | 35 | 34 | 29 |
| 776 | 12 | 10210576  | D8049     | D8049    | D8049    | D8049    | 5 | 644 | 644 | 35 | 34 | 29 |
| 777 | 12 | 8986633   | 8989808   | MI7025   | MI7025   | MI7025   | 5 | 644 | 644 | 35 | 34 | 29 |
| 778 | 12 | 8994193   | 8994587   | BZ05626  | BZ05626  | BZ05626  | 5 | 650 | 650 | 35 | 34 | 29 |
| 779 | 12 | 7043360   | 7043580   | CC54813  | CC54813  | CC54813  | 5 | 655 | 655 | 36 | 34 | 29 |
| 781 | 12 | 6217388   | 6217689   | MI1720   | MI1720   | MI1720   | 5 | 655 | 655 | 36 | 34 | 29 |
| 782 | 12 | 5177788   | 5177905   | CC480296 | CC480296 | CC480296 | 5 | 670 | 670 | 36 | 34 | 29 |
| 784 | 12 | 4782784   | 4782934   | BZ27078  | BZ27078  | BZ27078  | 5 | 674 | 674 | 36 | 34 | 29 |
| 785 | 12 | 3167967   | 3168365   | CC770412 | CC770412 | CC770412 | 5 | 678 | 678 | 36 | 34 | 29 |
| 787 | 12 | 2266550   | 2291004   | CC592888 | CC592888 | CC592888 | 5 | 695 | 695 | 36 | 34 | 29 |
| 788 | 12 | 1833866   | 1833863   | CC588553 | CC588553 | CC588553 | 5 | 699 | 699 | 36 | 34 | 29 |
| 789 | 12 | 1262521   | 1262687   | CC763960 | CC763960 | CC763960 | 5 | 699 | 699 | 36 | 34 | 29 |
| 790 | 12 | 16648034  | 16648179  | AW347612 | AW347612 | AW347612 | 5 | 699 | 699 | 37 | 35 | 30 |
| 791 | 12 | 16821966  | 16822120  | CC476740 | CC476740 | CC476740 | 5 | 707 | 707 | 37 | 35 | 30 |
| 792 | 12 | 16926149  | 16926343  | CC495717 | CC495717 | CC495717 | 5 | 710 | 710 | 37 | 35 | 30 |
| 795 | 12 | 36494513  | 36494936  | AW463030 | AW463030 | AW463030 | 5 | 714 | 714 | 38 | 36 | 31 |
| 796 | 12 | 36934304  | 36934528  | CC523426 | CC523426 | CC523426 | 5 | 718 | 718 | 38 | 36 | 31 |
| 797 | 12 | 37011941  | 37011643  | AW468487 | AW468487 | AW468487 | 5 | 718 | 718 | 38 | 36 | 31 |
| 798 | 12 | 37998541  | 37998983  | CC501001 | CC501001 | CC501001 | 5 | 722 | 722 | 38 | 36 | 31 |
| 799 | 12 | 38093144  | 38093391  | BZ939074 | BZ939074 | BZ939074 | 5 | 726 | 726 | 38 | 36 | 31 |
| 800 | 12 | 40417408  | 40417534  | BZ85444  | BZ85444  | BZ85444  | 5 | 751 | 751 | 38 | 36 | 31 |
| 801 | 12 | 41164713  | 41164841  | BZ880204 | BZ880204 | BZ880204 | 5 | 772 | 772 | 38 | 36 | 31 |
| 802 | 12 | 41952236  | 41952395  | CC476227 | CC476227 | CC476227 | 5 | 784 | 784 | 38 | 36 | 31 |
| 804 | 12 | 4324873   | 4325104   | CC499495 | CC499495 | CC499495 | 5 | 790 | 790 | 38 | 36 | 31 |
| 806 | 12 | 43846010  | 43846888  | CC493446 | CC493446 | CC493446 | 5 | 802 | 802 | 38 | 36 | 31 |
| 807 | 12 | 44409410  | 44409598  | CC770408 | CC770408 | CC770408 | 5 | 805 | 805 | 38 | 36 | 31 |
| 808 | 12 | 4562435   | 4562855   | CC57174  | CC57174  | CC57174  | 5 | 808 | 808 | 38 | 36 | 31 |
| 809 | 12 | 4644501   | 4644574   | CC583840 | CC583840 | CC583840 | 5 | 811 | 811 | 38 | 36 | 31 |
| 810 | 12 | 4726882   | 4726911   | BZ85527  | BZ85527  | BZ85527  | 5 | 814 | 814 | 38 | 36 | 31 |
| 811 | 12 | 48448255  | 48448373  | BZ962098 | BZ962098 | BZ962098 | 5 | 817 | 817 | 38 | 36 | 31 |
| 812 | 12 | 48987531  | 4898765   | AW484143 | AW484143 | AW484143 | 5 | 826 | 826 | 38 | 36 | 31 |
| 813 | 12 | 49473146  | 49473658  | X68212   | X68212   | X68212   | 5 | 826 | 826 | 38 | 36 | 31 |
| 814 | 12 | 16576328  | 16576565  | BZ939769 | BZ939769 | BZ939769 | 0 | 0   | 0   | 39 | 37 | 32 |
| 816 | 12 | 16536132  | 16536128  | BZ939769 | BZ939769 | BZ939769 | 0 | 0   | 0   | 39 | 37 | 32 |
| 817 | 12 | 164733872 | 164734360 | CC379967 | CC379967 | CC379967 | 6 | 16  | 16  | 4  | 4  | 37 |
| 818 | 12 | 12247972  | 12248006  | CC541186 | CC541186 | CC541186 | 6 | 32  | 32  | 40 | 38 | 32 |
| 819 | 12 | 12150807  | 12150971  | CC583565 | CC583565 | CC583565 | 6 | 40  | 40  | 40 | 38 | 32 |
| 820 | 12 | 12040131  | 12040146  | BZ920664 | BZ920664 | BZ920664 | 6 | 57  | 57  | 47 | 47 | 37 |
| 821 | 12 | 11955737  | 11955804  | AW461695 | AW461695 | AW461695 | 6 | 66  | 66  | 40 | 38 | 32 |
| 822 | 12 | 11942172  | 11942196  | BZ978015 | BZ978015 | BZ978015 | 6 | 70  | 70  | 40 | 38 | 32 |
| 823 | 12 | 11830871  | 11830845  | BZ984857 | BZ984857 | BZ984857 | 6 | 95  | 95  | 47 | 47 | 37 |
| 824 | 12 | 117188624 | 117188702 | CC529946 | CC529946 | CC529946 | 6 | 100 | 100 | 40 | 38 | 32 |
| 825 | 12 | 117088232 | 11708844  | CC499312 | CC499312 | CC499312 | 6 | 104 | 104 | 40 | 38 | 32 |
| 826 | 12 | 11622620  | 11622923  | CC57180  | CC57180  | CC57180  | 6 | 119 | 119 | 40 | 38 | 32 |
| 827 | 12 | 11514769  | 115148237 | CC519593 | CC519593 | CC519593 | 6 | 123 | 123 | 40 | 38 | 32 |
| 829 | 12 | 114529179 | 114529548 | BZ938237 | BZ938237 | BZ938237 | 6 | 130 | 130 | 40 | 38 | 32 |
| 830 | 12 | 11321626  | 11321803  | BZ941823 | BZ941823 | BZ941823 | 6 | 134 | 134 | 40 | 38 | 32 |
| 831 | 12 | 11236845  | 11236865  | CC771919 | CC771919 | CC771919 | 6 | 137 | 137 | 40 | 38 | 32 |
| 832 | 12 | 111288230 | 11128873  | CC55181  | CC55181  | CC55181  | 6 | 141 | 141 | 40 | 38 | 32 |
| 833 | 12 | 11102493  | 11102562  | BE117562 | BE117562 | BE117562 | 6 | 141 | 141 | 40 | 38 | 32 |
| 834 | 12 | 11013829  | 11013222  | BZ931816 | BZ931816 | BZ931816 | 6 | 144 | 144 | 40 | 38 | 32 |
| 835 | 12 | 109520411 | 109520786 | BZ932324 | BZ932324 | BZ932324 | 6 | 148 | 148 | 40 | 38 | 32 |
| 836 | 12 | 108428189 | 10843052  | BZ81520  | BZ81520  | BZ81520  | 6 | 152 | 152 | 40 | 38 | 32 |
| 837 | 12 | 10747889  | 10747208  | CC513945 | CC513945 | CC513945 | 6 | 156 | 156 | 40 | 38 | 32 |
| 838 | 12 | 10652866  | 10652918  | BZ963645 | BZ963645 | BZ963645 | 6 | 165 | 165 | 40 | 38 | 32 |
| 839 | 12 | 10534878  | 10534263  | BZ919177 | BZ919177 | BZ919177 | 6 | 178 | 178 | 40 | 38 | 32 |
| 840 | 12 | 104417034 | 10441729  | BZ982895 | BZ982895 | BZ982895 | 6 | 178 | 178 | 40 | 38 | 32 |
| 841 | 12 | 104074991 | 10407459  | AW266941 | AW266941 | AW266941 | 6 | 183 | 183 | 40 | 38 | 32 |
| 842 | 12 | 103717232 | 103717759 | BZ900461 | BZ900461 | BZ900461 | 6 | 198 | 198 | 40 | 38 | 32 |
| 843 | 12 | 102425514 | 102425793 | CC527810 | CC527810 | CC527810 | 6 | 202 | 202 | 40 | 38 | 32 |
| 844 | 12 | 101143765 | 101147980 | AW280359 | AW280359 | AW280359 | 6 | 206 | 206 | 40 | 38 | 32 |
| 846 | 12 | 100698750 | 100699159 | BZ85846  | BZ85846  | BZ85846  | 6 | 218 | 218 | 40 | 38 | 32 |
| 847 | 12 | 99523512  | 99524023  | BZ955226 | BZ955226 | BZ955226 | 6 | 230 | 230 | 40 | 38 | 32 |
| 848 | 12 | 9844722   | 9844789   | CC521461 | CC521461 | CC521461 | 6 | 239 | 239 | 40 | 38 | 32 |
| 849 | 12 | 9648206   | 9648551   | BZ964247 | BZ964247 | BZ964247 | 6 | 244 | 244 | 40 | 38 | 32 |
| 850 | 12 | 9524266   | 95243081  | CC492227 | CC492227 | CC492227 | 6 | 264 | 264 | 40 | 38 | 32 |
| 851 | 12 | 94291258  | 94291545  | CC583566 | CC583566 | CC583566 | 6 | 282 | 282 | 40 | 38 | 32 |
| 853 | 12 | 9326768   | 93267824  | CC521028 | CC521028 | CC521028 | 6 | 278 | 278 | 40 | 38 | 32 |
| 854 | 12 | 9218699   | 92186310  | CC512565 | CC512565 | CC512565 | 6 | 278 | 278 | 40 | 38 | 32 |
| 855 | 12 | 9104456   | 9104467   | BZ99685  | BZ99685  | BZ99685  | 6 | 282 | 282 | 40 | 38 | 32 |
| 856 | 12 | 89668992  | 89669220  | BE664068 | BE664068 | BE664068 | 6 | 295 | 295 | 40 | 38 | 32 |
| 857 | 12 | 8864723   | 8864790   | CC581382 | CC581382 | CC581382 | 6 | 310 | 310 | 41 | 39 | 33 |
| 858 | 12 | 19255066  | 19255895  | CC524804 | CC524804 | CC524804 | 6 | 310 | 310 | 41 | 39 | 33 |
| 859 | 12 | 20274344  | 20274547  | BE642805 | BE642805 | BE642805 | 6 | 343 | 343 | 41 | 39 | 33 |
| 860 | 12 | 21478748  | 21478883  | CC526569 | CC526569 | CC526569 | 6 | 343 | 343 | 41 | 39 | 33 |
| 861 | 12 | 2252736   | 2252829   | CC570778 | CC570778 | CC570778 | 6 | 350 | 350 | 41 | 39 | 33 |
| 862 | 12 | 2346872   | 2346923   | CC580112 | CC580112 | CC580112 | 6 | 385 | 385 | 41 | 39 | 33 |
| 865 | 12 | 24574354  | 24574544  | CC576598 | CC576598 | CC576598 | 6 | 401 | 401 | 41 | 39 | 33 |
| 866 | 12 | 25513021  | 25513326  | BZ989411 | BZ989411 | BZ989411 | 6 | 401 | 401 | 41 | 39 | 33 |
| 867 | 12 | 26762942  | 26763294  | BZ907175 | BZ907175 | BZ907175 | 6 | 410 | 410 | 41 | 39 | 33 |
| 868 | 12 | 28255453  | 28256028  | BZ983331 | BZ983331 | BZ983331 | 6 | 414 | 414 | 41 | 39 | 33 |
| 869 | 12 | 29073780  | 29074028  | BZ949499 | BZ949499 | BZ949499 | 6 | 436 | 436 | 41 | 39 | 33 |
| 871 | 12 | 30443627  | 30444071  | CC552404 | CC552404 | CC552404 | 6 | 473 | 473 | 41 | 39 | 33 |
| 872 | 12 | 31419424  | 31419429  | CC520450 | CC520450 | CC520450 | 6 | 482 | 482 | 41 | 39 | 33 |
| 873 | 12 | 32560075  | 32560502  | CC498713 | CC498713 | CC498713 | 6 | 500 | 500 | 41 | 39 | 33 |
| 874 | 12 | 33391783  | 33392312  | BZ916228 | BZ916228 | BZ916228 | 6 | 509 | 509 | 41 | 39 | 33 |
| 875 | 12 | 34407668  | 34407711  | CC562367 | CC562367 | CC562367 | 6 | 522 | 522 | 41 | 39 | 33 |
| 876 | 12 | 35706299  | 35706899  | CC763699 | CC763699 | CC763699 | 6 | 529 | 529 | 41 | 39 | 33 |
| 877 | 12 | 37112643  | 37112824  | CC502049 | CC502049 | CC502049 | 6 | 542 | 542 | 41 | 39 | 33 |
| 878 | 12 | 3745312   | 3745310   | AW353112 | AW353112 | AW353112 | 6 | 550 | 550 | 41 | 39 | 33 |
| 879 | 12 | 37844694  | 37844914  | AW695993 | AW695993 | AW695993 | 6 | 554 | 554 | 41 | 39 | 33 |
| 880 | 12 | 3756606   | 3756887   | BZ93679  | BZ93679  | BZ93679  | 6 | 554 | 554 | 41 | 39 | 33 |
| 881 | 12 | 38524187  | 38524601  | AW42871  | AW42871  | AW42871  | 6 | 559 | 559 | 41 | 39 | 33 |
| 882 | 12 | 39112660  | 39112660  | AW440312 | AW440312 | AW440312 | 6 | 569 | 569 | 41 | 39 | 33 |
| 883 | 12 | 39334539  | 39334742  | AW95792  | AW95792  | AW95792  | 6 | 577 | 577 | 41 | 39 | 33 |
| 884 | 12 | 40020228  | 40020740  | CC528198 | CC528198 | CC528198 | 6 | 592 | 592 | 41 | 39 | 33 |
| 885 | 12 | 41218760  | 41218770  | BZ970510 | BZ970510 | BZ970510 | 6 | 621 | 621 | 41 | 39 | 33 |
| 886 | 12 | 41802839  | 41803153  | AW392555 | AW392555 | AW392555 | 6 | 643 | 643 | 41 | 39 | 33 |
| 887 | 12 | 42287517  | 42287636  | BZ988222 | BZ988222 | BZ988222 | 6 | 647 | 647 | 41 | 39 | 33 |
| 888 | 12 | 43251962  | 43251997  | BZ920662 | BZ920662 | BZ920662 |   |     |     |    |    |    |

|      |    |           |           |           |           |           |   |      |      |    |         |         |
|------|----|-----------|-----------|-----------|-----------|-----------|---|------|------|----|---------|---------|
| 1040 | 19 | 277908    | 277922    | CC578938  | CC578938  | CC578938  | 7 | 467  | 467  | 51 | 49      | 42      |
| 1041 | 19 | 1276404   | 1276427   | BZ201546  | BZ201546  | BZ201546  | 7 | 471  | 471  | 51 | 47      | 42      |
| 1042 | 19 | 1529414   | 1529540   | AW632312  | AW632312  | AW632312  | 7 | 471  | 471  | 51 | 49      | 42      |
| 1043 | 19 | 1932233   | 1932309   | AW261150  | AW261150  | AW261150  | 7 | 476  | 476  | 51 | 49      | 42      |
| 1044 | 5  | 13229612  | 13229979  | AW148500  | AW148500  | AW148500  | 7 | 476  | 476  | 52 | deleced | 52      |
| 1045 | 5  | 13289004  | 13289085  | BZ373600  | BZ373600  | BZ373600  | 7 | 489  | 489  | 52 | 50      | 43      |
| 1046 | 5  | 13335958  | 13336455  | X75068    | X75068    | X75068    | 7 | 497  | 497  | 52 | 50      | 43      |
| 1047 | 5  | 13358608  | 13359157  | XZ7858    | XZ7858    | XZ7858    | 7 | 501  | 501  | 52 | 50      | 43      |
| 1048 | 5  | 13489814  | 13489868  | CC7618198 | CC7618198 | CC7618198 | 7 | 527  | 527  | 52 | 50      | 43      |
| 1049 | 5  | 135884803 | 135885410 | CC551706  | CC551706  | CC551706  | 7 | 540  | 540  | 52 | 50      | 43      |
| 1050 | 5  | 136389746 | 13640000  | AW359237  | AW359237  | AW359237  | 7 | 540  | 540  | 52 | 50      | 43      |
| 1052 | 5  | 13706763  | 13708814  | CC525807  | CC525807  | CC525807  | 7 | 556  | 556  | 52 | 50      | 43      |
| 1053 | 5  | 137115161 | 137115700 | AW289339  | AW289339  | AW289339  | 7 | 556  | 556  | 52 | 50      | 43      |
| 1054 | 5  | 138101717 | 138101872 | BZ011786  | BZ011786  | BZ011786  | 7 | 565  | 565  | 52 | 50      | 43      |
| 1055 | 5  | 139137019 | 13915722  | BZ281009  | BZ281009  | BZ281009  | 7 | 573  | 573  | 52 | 50      | 43      |
| 1056 | 5  | 13991926  | 139992217 | U48356    | U48356    | U48356    | 7 | 573  | 573  | 52 | 50      | 43      |
| 1057 | 5  | 140148501 | 140148577 | BZ288174  | BZ288174  | BZ288174  | 7 | 573  | 573  | 52 | 50      | 43      |
| 1058 | 5  | 141141286 | 141141824 | BZ261104  | BZ261104  | BZ261104  | 7 | 573  | 573  | 52 | 50      | 43      |
| 1059 | 5  | 141360420 | 141360468 | AW428576  | AW428576  | AW428576  | 7 | 577  | 577  | 52 | 50      | 43      |
| 1060 | 5  | 142103330 | 142103750 | CC587863  | CC587863  | CC587863  | 7 | 585  | 585  | 52 | 50      | 43      |
| 1061 | 5  | 143185013 | 143185108 | CC479340  | CC479340  | CC479340  | 7 | 589  | 589  | 52 | 50      | 43      |
| 1062 | 5  | 14423099  | 144230919 | BZ247116  | BZ247116  | BZ247116  | 7 | 603  | 603  | 52 | 50      | 43      |
| 1063 | 5  | 145300639 | 145300876 | CC557183  | CC557183  | CC557183  | 7 | 616  | 616  | 52 | 50      | 43      |
| 1064 | 5  | 14599260  | 145949935 | AW289211  | AW289211  | AW289211  | 7 | 637  | 637  | 52 | 50      | 43      |
| 1065 | 5  | 146182500 | 146182843 | CC477180  | CC477180  | CC477180  | 7 | 644  | 644  | 52 | 50      | 43      |
| 1066 | 5  | 14723059  | 147027550 | BZ260778  | BZ260778  | BZ260778  | 7 | 655  | 655  | 52 | 50      | 43      |
| 1067 | 5  | 148186682 | 148187474 | CC483684  | CC483684  | CC483684  | 7 | 684  | 684  | 52 | 50      | 43      |
| 1068 | 5  | 14911771  | 149172185 | BZ243681  | BZ243681  | BZ243681  | 7 | 715  | 715  | 52 | 50      | 43      |
| 1069 | 5  | 149761390 | 149761490 | AW269266  | AW269266  | AW269266  | 7 | 740  | 740  | 52 | 50      | 43      |
| 1071 | 5  | 150678581 | 150678700 | AW461573  | AW461573  | AW461573  | 7 | 788  | 788  | 52 | 50      | 43      |
| 1072 | 5  | 150388480 | 150388739 | AW266929  | AW266929  | AW266929  | 7 | 788  | 788  | 52 | 50      | 43      |
| 1073 | 5  | 15008962  | 15009143  | CC584482  | CC584482  | CC584482  | 7 | 797  | 797  | 52 | 50      | 43      |
| 1074 | 5  | 151022197 | 151022405 | AW266930  | AW266930  | AW266930  | 7 | 817  | 817  | 52 | 50      | 43      |
| 1075 | 5  | 151083969 | 151084188 | CC590913  | CC590913  | CC590913  | 7 | 832  | 832  | 52 | 50      | 43      |
| 1076 | 5  | 151982356 | 151982360 | CC582993  | CC582993  | CC582993  | 7 | 841  | 841  | 52 | 50      | 43      |
| 1077 | 5  | 15300382  | 153030650 | BZ270791  | BZ270791  | BZ270791  | 7 | 865  | 865  | 52 | 50      | 43      |
| 1078 | 5  | 154130945 | 154131060 | BZ017719  | BZ017719  | BZ017719  | 7 | 869  | 869  | 52 | 50      | 43      |
| 1080 | 5  | 154984697 | 154984707 | BZ099998  | BZ099998  | BZ099998  | 7 | 883  | 883  | 52 | 50      | 43      |
| 1081 | 5  | 15601785  | 156038294 | BZ261679  | BZ261679  | BZ261679  | 7 | 887  | 887  | 52 | 50      | 43      |
| 1082 | 5  | 157154336 | 157154819 | CC531675  | CC531675  | CC531675  | 7 | 892  | 887  | 52 | 50      | 43      |
| 1083 | 5  | 158086177 | 158086342 | BZ020099  | BZ020099  | BZ020099  | 7 | 892  | 892  | 52 | 50      | 43      |
| 1084 | 5  | 159069109 | 159069241 | CC497808  | CC497808  | CC497808  | 7 | 906  | 906  | 52 | 50      | 43      |
| 1085 | 5  | 160128796 | 160129233 | BZ013937  | BZ013937  | BZ013937  | 7 | 906  | 906  | 52 | 50      | 43      |
| 1087 | 5  | 161152435 | 161152922 | BZ247699  | BZ247699  | BZ247699  | 7 | 926  | 926  | 52 | 50      | 43      |
| 1088 | 5  | 161274699 | 161274717 | X03717    | X03717    | X03717    | 7 | 931  | 931  | 52 | 50      | 43      |
| 1089 | 5  | 162213107 | 162213335 | BZ099547  | BZ099547  | BZ099547  | 7 | 946  | 946  | 52 | 50      | 43      |
| 1090 | 5  | 163165942 | 163166029 | CC471837  | CC471837  | CC471837  | 7 | 962  | 962  | 52 | 50      | 43      |
| 1091 | 5  | 16391585  | 163917103 | BZ246772  | BZ246772  | BZ246772  | 7 | 967  | 967  | 52 | 50      | 43      |
| 1092 | 5  | 164022099 | 164022400 | BZ257167  | BZ257167  | BZ257167  | 7 | 972  | 972  | 52 | 50      | 43      |
| 1093 | 5  | 16508895  | 165088997 | BZ281131  | BZ281131  | BZ281131  | 7 | 987  | 987  | 52 | 50      | 43      |
| 1094 | 5  | 166095605 | 166095859 | CC590309  | CC590309  | CC590309  | 7 | 1005 | 1005 | 52 | 50      | 43      |
| 1095 | 5  | 16701560  | 167015633 | BZ015633  | BZ015633  | BZ015633  | 7 | 1005 | 1005 | 52 | 50      | 43      |
| 1096 | 5  | 80090362  | 80090920  | BZ013783  | BZ013783  | BZ013783  | 7 | 1021 | 1021 | 51 | 44      | deleced |
| 1097 | 5  | 80661646  | 80661969  | AW314133  | AW314133  | AW314133  | 7 | 1048 | 1048 | 53 | 51      | 44      |
| 1098 | 5  | 81115981  | 81116347  | CC487999  | CC487999  | CC487999  | 7 | 1048 | 1048 | 53 | 51      | 44      |
| 1099 | 5  | 82432362  | 82432362  | CC490538  | CC490538  | CC490538  | 7 | 1083 | 1083 | 53 | 51      | 44      |
| 1100 | 5  | 82972312  | 82973398  | U02292    | U02292    | U02292    | 7 | 1099 | 1099 | 53 | 51      | 44      |
| 1101 | 5  | 83141885  | 83142326  | BZ246767  | BZ246767  | BZ246767  | 7 | 1099 | 1099 | 53 | 51      | 44      |
| 1102 | 5  | 83911452  | 83912227  | CC525453  | CC525453  | CC525453  | 7 | 1118 | 1118 | 53 | 51      | 44      |
| 1103 | 5  | 85198930  | 85199136  | BZ291101  | BZ291101  | BZ291101  | 7 | 1130 | 1130 | 53 | 51      | 44      |
| 1104 | 5  | 86737888  | 86737977  | CC521453  | CC521453  | CC521453  | 7 | 1132 | 1132 | 53 | 51      | 44      |
| 1105 | 5  | 87424448  | 87426365  | CC532431  | CC532431  | CC532431  | 7 | 1167 | 1167 | 53 | 51      | 44      |
| 1106 | 5  | 88068280  | 88068564  | AW289198  | AW289198  | AW289198  | 7 | 1182 | 1182 | 53 | 51      | 44      |
| 1107 | 5  | 88635353  | 88635415  | CC590259  | CC590259  | CC590259  | 7 | 1191 | 1191 | 53 | 51      | 44      |
| 1108 | 5  | 89671480  | 89671670  | CC154044  | CC154044  | CC154044  | 7 | 1200 | 1200 | 53 | 51      | 44      |
| 1109 | 5  | 90289229  | 90289529  | BZ257875  | BZ257875  | BZ257875  | 7 | 1208 | 1208 | 53 | 51      | 44      |
| 1110 | 5  | 91846510  | 91846597  | BZ36902   | BZ36902   | BZ36902   | 7 | 1212 | 1212 | 53 | 51      | 44      |
| 1111 | 5  | 9238198   | 9238471   | BZ287450  | BZ287450  | BZ287450  | 7 | 1224 | 1224 | 53 | 51      | 44      |
| 1113 | 5  | 9382186   | 9382318   | BZ278088  | BZ278088  | BZ278088  | 7 | 1225 | 1225 | 53 | 51      | 44      |
| 1114 | 5  | 94891456  | 94891763  | BZ09128   | BZ09128   | BZ09128   | 7 | 1242 | 1242 | 53 | 51      | 44      |
| 1115 | 5  | 95890600  | 95890738  | BZ051943  | BZ051943  | BZ051943  | 7 | 1250 | 1250 | 53 | 51      | 44      |
| 1116 | 5  | 96451666  | 96451707  | AW314546  | AW314546  | AW314546  | 7 | 1255 | 1255 | 53 | 51      | 44      |
| 1117 | 5  | 96910013  | 96910119  | CC530755  | CC530755  | CC530755  | 7 | 1270 | 1270 | 53 | 51      | 44      |
| 1118 | 5  | 98133845  | 98134167  | BZ032026  | BZ032026  | BZ032026  | 7 | 1288 | 1288 | 53 | 51      | 44      |
| 1120 | 5  | 99002020  | 99002424  | BZ253299  | BZ253299  | BZ253299  | 7 | 1307 | 1307 | 53 | 51      | 44      |
| 1121 | 5  | 10002512  | 10002496  | CC525525  | CC525525  | CC525525  | 7 | 1318 | 1318 | 53 | 51      | 44      |
| 1122 | 5  | 101008668 | 101031077 | CC483975  | CC483975  | CC483975  | 7 | 1325 | 1325 | 53 | 51      | 44      |
| 1124 | 5  | 101950400 | 101950518 | CC593804  | CC593804  | CC593804  | 7 | 1328 | 1328 | 53 | 51      | 44      |
| 1125 | 5  | 10296412  | 10296928  | CC573785  | CC573785  | CC573785  | 7 | 1336 | 1336 | 53 | 51      | 44      |
| 1126 | 5  | 104078330 | 104078717 | CC590330  | CC590330  | CC590330  | 7 | 1344 | 1344 | 53 | 51      | 44      |
| 1127 | 5  | 104095140 | 104095638 | BZ07418   | BZ07418   | BZ07418   | 7 | 1348 | 1348 | 53 | 51      | 44      |
| 1128 | 5  | 106037388 | 106037388 | CC578085  | CC578085  | CC578085  | 7 | 1370 | 1370 | 53 | 51      | 44      |
| 1129 | 5  | 106746001 | 106749916 | AW485404  | AW485404  | AW485404  | 7 | 1370 | 1370 | 53 | 51      | 44      |
| 1130 | 5  | 107022010 | 107022094 | CC559825  | CC559825  | CC559825  | 7 | 1370 | 1370 | 53 | 51      | 44      |
| 1131 | 5  | 10804492  | 108045228 | CC561997  | CC561997  | CC561997  | 7 | 1389 | 1389 | 53 | 51      | 44      |
| 1132 | 5  | 108884662 | 108887023 | CC59292   | CC59292   | CC59292   | 7 | 1410 | 1410 | 53 | 51      | 44      |
| 1133 | 5  | 109725853 | 109726214 | BZ021795  | BZ021795  | BZ021795  | 7 | 1410 | 1410 | 53 | 51      | 44      |
| 1135 | 4  | 170061557 | 170061775 | CC522148  | CC522148  | CC522148  | 7 | 0    | 0    | 54 | 52      | 45      |
| 1136 | 4  | 170223654 | 170223654 | AW464696  | AW464696  | AW464696  | 7 | 16   | 16   | 54 | 52      | 45      |
| 1137 | 4  | 170986403 | 170986567 | CC506643  | CC506643  | CC506643  | 7 | 20   | 20   | 54 | 52      | 45      |
| 1138 | 4  | 171632491 | 171632656 | CC566492  | CC566492  | CC566492  | 7 | 24   | 24   | 54 | 52      | 45      |
| 1140 | 4  | 17304466  | 17304469  | CC510345  | CC510345  | CC510345  | 7 | 44   | 44   | 54 | 52      | 45      |
| 1141 | 4  | 174452156 | 174452241 | BZ206647  | BZ206647  | BZ206647  | 7 | 54   | 54   | 54 | 52      | 45      |
| 1142 | 4  | 175526306 | 175526900 | BZ272734  | BZ272734  | BZ272734  | 7 | 57   | 57   | 54 | 52      | 45      |
| 1143 | 4  | 176621233 | 176621314 | CC498901  | CC498901  | CC498901  | 7 | 60   | 60   | 54 | 52      | 45      |
| 1144 | 8  | 11753861  | 11734116  | AW269016  | AW269016  | AW269016  | 7 | 65   | 66   | 54 | 52      | 45      |
| 1145 | 8  | 11653144  | 11653533  | CC515941  | CC515941  | CC515941  | 7 | 70   | 70   | 55 | 53      | 46      |
| 1146 | 8  | 10958948  | 10959168  | CC475217  | CC475217  | CC475217  | 7 | 76   | 76   | 55 |         |         |

Table with 20 columns (IDs 1303-1553) and 6 rows of alphanumeric data. The data is organized in a grid format, likely representing a mapping or classification system.

AG here

AG is wrong in merging these two blocks, as other blocks comes in between

2 -> 1

This singleton prevented merging of two blocks

1 -> 2

singleton

AG here

|      |    |           |           |          |          |          |    |     |     |    |    |    |
|------|----|-----------|-----------|----------|----------|----------|----|-----|-----|----|----|----|
| 1555 | 14 | 8776356   | 8776369   | BZ931998 | BZ931998 | BZ931998 | 10 | 681 | 681 | 78 | 76 | 69 |
| 1556 | 14 | 8804695   | 8804710   | CC23401  | CC23401  | CC23401  | 10 | 684 | 684 | 78 | 76 | 69 |
| 1557 | 14 | 8919044   | 8919043   | BZ91552  | BZ91552  | BZ91552  | 10 | 687 | 687 | 78 | 76 | 69 |
| 1558 | 14 | 9018304   | 9018315   | CC14173  | CC14173  | CC14173  | 10 | 694 | 694 | 78 | 76 | 69 |
| 1559 | 2  | 9512669   | 9512674   | BZ93184  | BZ93184  | BZ93184  | 11 | 0   | 0   | 79 | 70 | 0  |
| 1560 | 2  | 9519801   | 9519803   | AW33682  | AW33682  | AW33682  | 11 | 8   | 8   | 79 | 70 | 70 |
| 1561 | 2  | 9672466   | 9672495   | BZ932543 | BZ932543 | BZ932543 | 11 | 8   | 8   | 79 | 70 | 70 |
| 1562 | 2  | 9717318   | 9717374   | AW43908  | AW43908  | AW43908  | 11 | 11  | 11  | 79 | 70 | 70 |
| 1563 | 2  | 9738380   | 9738716   | CC33310  | CC33310  | CC33310  | 11 | 17  | 17  | 79 | 79 | 79 |
| 1564 | 2  | 9825262   | 9825264   | BZ953931 | BZ953931 | BZ953931 | 11 | 23  | 23  | 79 | 70 | 70 |
| 1565 | 2  | 9968475   | 9968502   | AW48180  | AW48180  | AW48180  | 11 | 26  | 26  | 79 | 70 | 70 |
| 1566 | 2  | 9990876   | 9991094   | BZ96906  | BZ96906  | BZ96906  | 11 | 30  | 30  | 79 | 79 | 79 |
| 1567 | 2  | 10034429  | 10034586  | CC491027 | CC491027 | CC491027 | 11 | 39  | 39  | 79 | 77 | 77 |
| 1568 | 2  | 10157256  | 10157631  | BZ90888  | BZ90888  | BZ90888  | 11 | 44  | 44  | 79 | 70 | 70 |
| 1569 | 2  | 10196394  | 10196508  | AW41551  | AW41551  | AW41551  | 11 | 47  | 47  | 79 | 79 | 79 |
| 1570 | 2  | 10271191  | 10271199  | BZ89374  | BZ89374  | BZ89374  | 11 | 50  | 50  | 77 | 70 | 70 |
| 1571 | 2  | 10416315  | 10416455  | BZ926855 | BZ926855 | BZ926855 | 11 | 59  | 59  | 79 | 79 | 79 |
| 1572 | 2  | 10580720  | 10580985  | BZ952395 | BZ952395 | BZ952395 | 11 | 68  | 68  | 77 | 70 | 70 |
| 1573 | 2  | 1466794   | 14668074  | AW92130  | AW92130  | AW92130  | 11 | 79  | 79  | 78 | 71 | 71 |
| 1574 | 2  | 14517349  | 14517571  | BZ942883 | BZ942883 | BZ942883 | 11 | 89  | 89  | 80 | 78 | 71 |
| 1576 | 2  | 14553357  | 14553322  | AW26953  | AW26953  | AW26953  | 11 | 89  | 89  | 80 | 78 | 71 |
| 1577 | 2  | 1486599   | 1486599   | AW26299  | AW26299  | AW26299  | 11 | 92  | 92  | 78 | 71 | 71 |
| 1578 | 2  | 7338272   | 7338556   | BZ93507  | BZ93507  | BZ93507  | 11 | 103 | 103 | 80 | 78 | 71 |
| 1579 | 2  | 7321276   | 7321302   | AW32757  | AW32757  | AW32757  | 11 | 108 | 108 | 80 | 78 | 71 |
| 1580 | 2  | 7262449   | 7262487   | BZ92292  | BZ92292  | BZ92292  | 11 | 111 | 111 | 80 | 78 | 71 |
| 1581 | 2  | 7174267   | 7174296   | CC47371  | CC47371  | CC47371  | 11 | 120 | 120 | 80 | 78 | 71 |
| 1582 | 2  | 71565792  | 71566190  | AW487346 | AW487346 | AW487346 | 11 | 122 | 122 | 80 | 78 | 71 |
| 1583 | 2  | 7058814   | 7058820   | BZ95721  | BZ95721  | BZ95721  | 11 | 128 | 128 | 80 | 78 | 71 |
| 1584 | 2  | 7148472   | 7148491   | X88491   | X88491   | X88491   | 11 | 131 | 131 | 79 | 71 | 71 |
| 1585 | 2  | 3235928   | 3235953   | AW388065 | AW388065 | AW388065 | 11 | 145 | 145 | 81 | 79 | 72 |
| 1586 | 2  | 3299391   | 3299394   | BZ98163  | BZ98163  | BZ98163  | 11 | 151 | 151 | 81 | 79 | 72 |
| 1587 | 2  | 3353671   | 3353671   | AW42271  | AW42271  | AW42271  | 11 | 151 | 151 | 81 | 79 | 72 |
| 1588 | 2  | 3365592   | 33655789  | BZ943157 | BZ943157 | BZ943157 | 11 | 163 | 163 | 79 | 72 | 72 |
| 1589 | 2  | 34664823  | 3466516   | BZ90811  | BZ90811  | BZ90811  | 11 | 178 | 178 | 81 | 79 | 72 |
| 1590 | 2  | 3598132   | 3598122   | BZ90849  | BZ90849  | BZ90849  | 11 | 180 | 180 | 81 | 79 | 72 |
| 1591 | 2  | 3708906   | 3708900   | BZ92879  | BZ92879  | BZ92879  | 11 | 183 | 183 | 81 | 79 | 72 |
| 1592 | 2  | 37764916  | 3776552   | BZ920139 | BZ920139 | BZ920139 | 11 | 188 | 188 | 81 | 79 | 72 |
| 1593 | 2  | 3888411   | 3888498   | AW46449  | AW46449  | AW46449  | 11 | 210 | 210 | 79 | 72 | 72 |
| 1594 | 2  | 3929076   | 3929104   | BZ90876  | BZ90876  | BZ90876  | 11 | 213 | 213 | 79 | 72 | 72 |
| 1595 | 2  | 4059449   | 4059450   | BZ90927  | BZ90927  | BZ90927  | 11 | 222 | 222 | 81 | 79 | 72 |
| 1596 | 2  | 4170765   | 4170800   | BZ90947  | BZ90947  | BZ90947  | 11 | 228 | 228 | 81 | 79 | 72 |
| 1598 | 2  | 4247184   | 4247137   | AW37984  | AW37984  | AW37984  | 11 | 237 | 237 | 81 | 79 | 72 |
| 1599 | 2  | 42981508  | 42981705  | BZ916795 | BZ916795 | BZ916795 | 11 | 237 | 237 | 81 | 79 | 72 |
| 1600 | 2  | 4383297   | 4383333   | BZ90819  | BZ90819  | BZ90819  | 11 | 243 | 243 | 79 | 72 | 72 |
| 1601 | 2  | 4437105   | 4437243   | AJ00548  | AJ00548  | AJ00548  | 11 | 246 | 246 | 81 | 79 | 72 |
| 1602 | 2  | 4484802   | 4484856   | BZ91564  | BZ91564  | BZ91564  | 11 | 252 | 252 | 79 | 72 | 72 |
| 1603 | 2  | 4604840   | 4604876   | BZ937491 | BZ937491 | BZ937491 | 11 | 258 | 258 | 79 | 72 | 72 |
| 1604 | 2  | 4687631   | 4687672   | BZ90950  | BZ90950  | BZ90950  | 11 | 261 | 261 | 81 | 79 | 72 |
| 1605 | 2  | 4784449   | 4784475   | AW26975  | AW26975  | AW26975  | 11 | 271 | 271 | 79 | 72 | 72 |
| 1606 | 2  | 4882647   | 4882769   | U2004    | U2004    | U2004    | 11 | 278 | 278 | 79 | 72 | 72 |
| 1607 | 2  | 4977787   | 4977849   | BZ93065  | BZ93065  | BZ93065  | 11 | 282 | 282 | 81 | 79 | 72 |
| 1608 | 2  | 4918708   | 4918737   | BZ94837  | BZ94837  | BZ94837  | 11 | 285 | 285 | 79 | 72 | 72 |
| 1609 | 2  | 5035732   | 50354005  | BZ938075 | BZ938075 | BZ938075 | 11 | 288 | 288 | 79 | 72 | 72 |
| 1610 | 2  | 5116286   | 5116721   | L14855   | L14855   | L14855   | 11 | 288 | 288 | 81 | 79 | 72 |
| 1611 | 2  | 5181457   | 5181574   | BZ95618  | BZ95618  | BZ95618  | 11 | 291 | 291 | 81 | 79 | 72 |
| 1612 | 2  | 5205725   | 5205730   | BZ94262  | BZ94262  | BZ94262  | 11 | 310 | 310 | 81 | 79 | 72 |
| 1613 | 2  | 5405302   | 5405388   | BZ948266 | BZ948266 | BZ948266 | 11 | 315 | 315 | 81 | 79 | 72 |
| 1614 | 2  | 5539715   | 5539848   | BZ91665  | BZ91665  | BZ91665  | 11 | 337 | 337 | 81 | 79 | 72 |
| 1615 | 2  | 5568914   | 5568995   | BZ94164  | BZ94164  | BZ94164  | 11 | 340 | 340 | 81 | 79 | 72 |
| 1616 | 2  | 5645158   | 5645154   | BZ948263 | BZ948263 | BZ948263 | 11 | 351 | 351 | 81 | 79 | 72 |
| 1617 | 2  | 5788289   | 5788321   | BZ95242  | BZ95242  | BZ95242  | 11 | 357 | 357 | 81 | 79 | 72 |
| 1618 | 2  | 5878544   | 5878408   | BZ95016  | BZ95016  | BZ95016  | 11 | 369 | 369 | 81 | 79 | 72 |
| 1620 | 2  | 5985060   | 5983109   | BZ90922  | BZ90922  | BZ90922  | 11 | 374 | 374 | 81 | 79 | 72 |
| 1623 | 2  | 61170237  | 6117021   | BZ920913 | BZ920913 | BZ920913 | 11 | 383 | 383 | 81 | 79 | 72 |
| 1624 | 2  | 7384895   | 7384121   | BZ92799  | BZ92799  | BZ92799  | 11 | 388 | 388 | 82 | 80 | 73 |
| 1625 | 2  | 7561177   | 7561345   | AW35401  | AW35401  | AW35401  | 11 | 393 | 393 | 83 | 80 | 73 |
| 1626 | 2  | 10612738  | 10612903  | AW312031 | AW312031 | AW312031 | 11 | 418 | 418 | 83 | 81 | 74 |
| 1627 | 2  | 10698026  | 10698028  | CC72637  | CC72637  | CC72637  | 11 | 427 | 427 | 83 | 81 | 74 |
| 1628 | 2  | 10804483  | 10804820  | CC37463  | CC37463  | CC37463  | 11 | 432 | 432 | 83 | 81 | 74 |
| 1630 | 2  | 11112959  | 11112999  | BZ947794 | BZ947794 | BZ947794 | 11 | 451 | 451 | 83 | 81 | 74 |
| 1631 | 2  | 111612053 | 11161222  | AW46001  | AW46001  | AW46001  | 11 | 453 | 453 | 83 | 81 | 74 |
| 1632 | 2  | 11316329  | 11316369  | BZ915916 | BZ915916 | BZ915916 | 11 | 462 | 462 | 83 | 80 | 73 |
| 1633 | 2  | 113672545 | 113672698 | AW428019 | AW428019 | AW428019 | 11 | 479 | 479 | 83 | 81 | 74 |
| 1634 | 2  | 8900997   | 8900104   | CC475816 | CC475816 | CC475816 | 11 | 497 | 497 | 84 | 82 | 75 |
| 1635 | 2  | 8819506   | 88199705  | BZ94229  | BZ94229  | BZ94229  | 11 | 502 | 502 | 84 | 82 | 75 |
| 1636 | 2  | 8691628   | 8691614   | AW29381  | AW29381  | AW29381  | 11 | 507 | 507 | 84 | 82 | 75 |
| 1637 | 2  | 86628026  | 86628518  | BZ939600 | BZ939600 | BZ939600 | 11 | 507 | 507 | 84 | 82 | 75 |
| 1638 | 2  | 8592206   | 8592186   | CC47289  | CC47289  | CC47289  | 11 | 510 | 510 | 84 | 82 | 75 |
| 1639 | 2  | 8579687   | 8579769   | AW29187  | AW29187  | AW29187  | 11 | 513 | 513 | 84 | 82 | 75 |
| 1640 | 2  | 8567219   | 8567387   | M81593   | M81593   | M81593   | 11 | 513 | 513 | 84 | 82 | 75 |
| 1641 | 2  | 84752672  | 8473786   | BZ924161 | BZ924161 | BZ924161 | 11 | 513 | 513 | 84 | 82 | 75 |
| 1642 | 2  | 8357074   | 8357064   | BZ92772  | BZ92772  | BZ92772  | 11 | 518 | 518 | 84 | 82 | 75 |
| 1643 | 2  | 8228773   | 8228861   | BZ907565 | BZ907565 | BZ907565 | 11 | 526 | 526 | 84 | 82 | 75 |
| 1644 | 2  | 81201882  | 8120232   | BZ951026 | BZ951026 | BZ951026 | 11 | 532 | 532 | 84 | 82 | 75 |
| 1645 | 2  | 8028427   | 8028703   | CC14824  | CC14824  | CC14824  | 11 | 549 | 549 | 84 | 82 | 75 |
| 1646 | 2  | 7946308   | 7946112   | BZ94398  | BZ94398  | BZ94398  | 11 | 554 | 554 | 84 | 82 | 75 |
| 1647 | 2  | 7800161   | 7800177   | BZ943635 | BZ943635 | BZ943635 | 11 | 568 | 568 | 84 | 82 | 75 |
| 1648 | 2  | 76897250  | 76897405  | BZ90712  | BZ90712  | BZ90712  | 11 | 570 | 570 | 84 | 82 | 75 |
| 1649 | 2  | 6122076   | 6122076   | AW56448  | AW56448  | AW56448  | 11 | 595 | 595 | 85 | 83 | 76 |
| 1650 | 2  | 62965635  | 6296966   | BZ955708 | BZ955708 | BZ955708 | 11 | 611 | 611 | 85 | 83 | 76 |
| 1651 | 2  | 6374379   | 6374360   | AW479517 | AW479517 | AW479517 | 11 | 621 | 621 | 85 | 83 | 76 |
| 1652 | 2  | 63804430  | 6380556   | BZ906230 | BZ906230 | BZ906230 | 11 | 626 | 626 | 85 | 83 | 76 |
| 1653 | 2  | 64706245  | 6470566   | BZ921785 | BZ921785 | BZ921785 | 11 | 629 | 629 | 85 | 83 | 76 |
| 1654 | 2  | 65880510  | 6588073   | BZ952530 | BZ952530 | BZ952530 | 11 | 637 | 637 | 85 | 83 | 76 |
| 1655 | 2  | 66962790  | 6696146   | BZ915155 | BZ915155 | BZ915155 | 11 | 640 | 640 | 85 | 83 | 76 |
| 1656 | 2  | 6754812   | 6754912   | AW34665  | AW34665  | AW34665  | 11 | 642 | 642 | 85 | 83 | 76 |
| 1657 | 2  | 6798436   | 6798451   | BZ949272 | BZ949272 | BZ949272 | 11 | 656 | 656 | 85 | 83 | 76 |
| 1658 | 2  | 69204030  | 6920625   | BZ940166 | BZ940166 | BZ940166 | 11 | 662 | 662 | 85 | 83 | 76 |
| 1659 | 2  | 6996412   | 6996512   | 422248   | 422248   | 422248   | 11 | 683 | 683 | 85 | 83 | 76 |
| 1660 | 2  | 80546852  | 80547178  | BZ852021 | BZ852021 | BZ852021 | 11 | 697 | 697 | 86 | 84 | 77 |
| 1661 | 2  | 2969932   | 2969133   | BZ94944  | BZ94944  | BZ94944  | 11 | 708 | 708 | 86 | 84 | 77 |
| 1662 |    |           |           |          |          |          |    |     |     |    |    |    |

|      |    |           |           |           |           |           |    |     |     |     |    |    |
|------|----|-----------|-----------|-----------|-----------|-----------|----|-----|-----|-----|----|----|
| 1809 | 13 | 9447125   | 9447184   | BZ02176   | BZ02176   | BZ02176   | 12 | 496 | 496 | 91  | 89 | 82 |
| 1810 | 13 | 9551369   | 9551391   | BZ08307   | BZ08307   | BZ08307   | 12 | 517 | 517 | 91  | 89 | 82 |
| 1811 | 13 | 9668275   | 9668542   | BZ04245   | BZ04245   | BZ04245   | 12 | 533 | 533 | 91  | 89 | 82 |
| 1812 | 13 | 9779091   | 9779207   | BZ04125   | BZ04125   | BZ04125   | 12 | 543 | 543 | 91  | 89 | 82 |
| 1813 | 13 | 9800218   | 9800218   | BZ05437   | BZ05437   | BZ05437   | 12 | 547 | 547 | 91  | 89 | 82 |
| 1814 | 13 | 9865912   | 9866040   | CC08421   | CC08421   | CC08421   | 12 | 557 | 557 | 91  | 89 | 82 |
| 1815 | 13 | 101188809 | 101188943 | CC08206   | CC08206   | CC08206   | 12 | 572 | 572 | 91  | 89 | 82 |
| 1816 | 13 | 10208352  | 10208805  | CC03999   | CC03999   | CC03999   | 12 | 572 | 572 | 91  | 89 | 82 |
| 1817 | 13 | 10234826  | 10234826  | BZ08313   | BZ08313   | BZ08313   | 12 | 577 | 577 | 91  | 89 | 82 |
| 1818 | 13 | 10234684  | 10236387  | CC05574   | CC05574   | CC05574   | 12 | 577 | 577 | 91  | 89 | 82 |
| 1819 | 13 | 10340828  | 10340939  | CC04269   | CC04269   | CC04269   | 12 | 577 | 577 | 91  | 89 | 82 |
| 1820 | 13 | 10414377  | 10418361  | CC04068   | CC04068   | CC04068   | 12 | 581 | 581 | 91  | 89 | 82 |
| 1822 | 13 | 10538078  | 10539537  | CC03629   | CC03629   | CC03629   | 12 | 602 | 602 | 91  | 89 | 82 |
| 1823 | 13 | 10644381  | 10644458  | CC05121   | CC05121   | CC05121   | 12 | 606 | 606 | 91  | 89 | 82 |
| 1824 | 13 | 10756035  | 10756072  | BZ09623   | BZ09623   | BZ09623   | 12 | 617 | 617 | 91  | 89 | 82 |
| 1826 | 13 | 10875396  | 10875722  | BZ09620   | BZ09620   | BZ09620   | 12 | 638 | 638 | 91  | 89 | 82 |
| 1827 | 13 | 10980782  | 10980936  | CC05595   | CC05595   | CC05595   | 12 | 643 | 643 | 91  | 89 | 82 |
| 1829 | 13 | 11065606  | 11065752  | CC01129   | CC01129   | CC01129   | 12 | 652 | 652 | 91  | 89 | 82 |
| 1830 | 13 | 11170235  | 11170241  | BZ08552   | BZ08552   | BZ08552   | 12 | 657 | 657 | 91  | 89 | 82 |
| 1831 | 13 | 11278310  | 11278369  | CC04428   | CC04428   | CC04428   | 12 | 692 | 692 | 91  | 89 | 82 |
| 1832 | 13 | 112851231 | 11285173  | X00673    | X00673    | X00673    | 12 | 702 | 702 | 91  | 89 | 82 |
| 1833 | 13 | 11320980  | 11320980  | L09113    | L09113    | L09113    | 12 | 702 | 702 | 91  | 89 | 82 |
| 1834 | 20 | 818347    | 8183781   | CC070305  | CC070305  | CC070305  | 13 | 0   | 0   | 92  | 90 | 83 |
| 1835 | 20 | 8697370   | 8694005   | J01317    | J01317    | J01317    | 13 | 8   | 8   | 92  | 90 | 83 |
| 1836 | 20 | 9210137   | 9210055   | BZ09057   | BZ09057   | BZ09057   | 13 | 11  | 11  | 92  | 90 | 83 |
| 1837 | 20 | 1020200   | 1028241   | CC08701   | CC08701   | CC08701   | 13 | 17  | 17  | 92  | 90 | 83 |
| 1838 | 20 | 1055249   | 1055339   | AW267000  | AW267000  | AW267000  | 13 | 26  | 26  | 92  | 90 | 83 |
| 1839 | 20 | 1055309   | 1055454   | AW16418   | AW16418   | AW16418   | 13 | 33  | 33  | 92  | 90 | 83 |
| 1840 | 20 | 1125972   | 1125986   | CC034153  | CC034153  | CC034153  | 13 | 42  | 42  | 92  | 90 | 83 |
| 1841 | 20 | 1218282   | 1218632   | CC079427  | CC079427  | CC079427  | 13 | 57  | 57  | 92  | 90 | 83 |
| 1842 | 20 | 1326205   | 1326254   | CC077540  | CC077540  | CC077540  | 13 | 78  | 78  | 92  | 90 | 83 |
| 1843 | 20 | 14309204  | 14309204  | CC0580704 | CC0580704 | CC0580704 | 13 | 88  | 88  | 92  | 90 | 83 |
| 1844 | 20 | 15340233  | 15340502  | BZ046431  | BZ046431  | BZ046431  | 13 | 102 | 102 | 92  | 90 | 83 |
| 1845 | 20 | 16660807  | 16660981  | AW062538  | AW062538  | AW062538  | 13 | 112 | 112 | 92  | 90 | 83 |
| 1846 | 20 | 1296431   | 1296865   | BZ063771  | BZ063771  | BZ063771  | 13 | 130 | 130 | 93  | 91 | 84 |
| 1847 | 20 | 11871358  | 11871671  | CC0584524 | CC0584524 | CC0584524 | 13 | 157 | 157 | 93  | 91 | 84 |
| 1848 | 20 | 10712604  | 10712688  | BZ048795  | BZ048795  | BZ048795  | 13 | 180 | 180 | 93  | 91 | 84 |
| 1849 | 20 | 9591820   | 9592119   | CC0532463 | CC0532463 | CC0532463 | 13 | 190 | 190 | 93  | 91 | 84 |
| 1851 | 20 | 8663584   | 8663605   | CC050213  | CC050213  | CC050213  | 13 | 197 | 197 | 93  | 91 | 84 |
| 1852 | 20 | 7595728   | 7596017   | CC046972  | CC046972  | CC046972  | 13 | 197 | 197 | 93  | 91 | 84 |
| 1853 | 20 | 6670322   | 6670983   | BZ096185  | BZ096185  | BZ096185  | 13 | 197 | 197 | 93  | 91 | 84 |
| 1854 | 20 | 2703263   | 2703863   | CC015837  | CC015837  | CC015837  | 13 | 209 | 209 | 93  | 91 | 84 |
| 1855 | 20 | 3508002   | 3508875   | CC029324  | CC029324  | CC029324  | 13 | 216 | 216 | 94  | 91 | 84 |
| 1856 | 20 | 34741404  | 34741981  | CC085079  | CC085079  | CC085079  | 13 | 219 | 219 | 94  | 92 | 85 |
| 1857 | 20 | 33818029  | 33818028  | CC096068  | CC096068  | CC096068  | 13 | 223 | 223 | 94  | 92 | 85 |
| 1858 | 20 | 1020360   | 1051111   | BZ091499  | BZ091499  | BZ091499  | 13 | 232 | 232 | 95  | 93 | 86 |
| 1859 | 20 | 20673742  | 20674003  | CC003379  | CC003379  | CC003379  | 13 | 232 | 232 | 95  | 93 | 86 |
| 1860 | 20 | 21692304  | 21692348  | BZ013728  | BZ013728  | BZ013728  | 13 | 232 | 232 | 95  | 93 | 86 |
| 1861 | 20 | 2284228   | 2284228   | AW03968   | AW03968   | AW03968   | 13 | 240 | 240 | 95  | 93 | 86 |
| 1862 | 20 | 23793104  | 23793200  | CC073067  | CC073067  | CC073067  | 13 | 258 | 258 | 95  | 93 | 86 |
| 1863 | 20 | 24782334  | 24782737  | CC084042  | CC084042  | CC084042  | 13 | 258 | 258 | 95  | 93 | 86 |
| 1864 | 20 | 25917515  | 25918065  | BZ086452  | BZ086452  | BZ086452  | 13 | 258 | 258 | 95  | 93 | 86 |
| 1865 | 20 | 38686727  | 38686906  | BZ000194  | BZ000194  | BZ000194  | 13 | 258 | 258 | 95  | 93 | 86 |
| 1866 | 20 | 1370361   | 1370785   | AF011925  | AF011925  | AF011925  | 13 | 258 | 258 | 96  | 94 | 87 |
| 1867 | 20 | 13916409  | 13916720  | CC070952  | CC070952  | CC070952  | 13 | 258 | 258 | 96  | 94 | 87 |
| 1868 | 20 | 1493948   | 1493948   | CC078975  | CC078975  | CC078975  | 13 | 269 | 269 | 96  | 94 | 87 |
| 1869 | 20 | 15916391  | 15916779  | BZ063038  | BZ063038  | BZ063038  | 13 | 274 | 274 | 96  | 94 | 87 |
| 1870 | 20 | 10982568  | 10982877  | BZ021480  | BZ021480  | BZ021480  | 13 | 285 | 285 | 96  | 94 | 87 |
| 1871 | 20 | 1767444   | 1767953   | CC091511  | CC091511  | CC091511  | 13 | 285 | 285 | 96  | 94 | 87 |
| 1872 | 20 | 18722312  | 18722710  | CC092765  | CC092765  | CC092765  | 13 | 285 | 285 | 96  | 94 | 87 |
| 1873 | 20 | 32702848  | 32703080  | BZ090411  | BZ090411  | BZ090411  | 13 | 290 | 290 | 97  | 95 | 88 |
| 1874 | 20 | 31643886  | 31644070  | BZ075181  | BZ075181  | BZ075181  | 13 | 300 | 300 | 97  | 95 | 88 |
| 1875 | 20 | 30655489  | 30655749  | CC086447  | CC086447  | CC086447  | 13 | 300 | 300 | 97  | 95 | 88 |
| 1876 | 20 | 2980472   | 2980970   | AF025996  | AF025996  | AF025996  | 13 | 300 | 300 | 97  | 95 | 88 |
| 1877 | 20 | 28951600  | 28951945  | AW083818  | AW083818  | AW083818  | 13 | 300 | 300 | 97  | 95 | 88 |
| 1878 | 20 | 2862496   | 2862496   | CC047777  | CC047777  | CC047777  | 13 | 310 | 310 | 97  | 95 | 88 |
| 1879 | 20 | 2800408   | 2800401   | AW042460  | AW042460  | AW042460  | 13 | 310 | 310 | 97  | 95 | 88 |
| 1880 | 20 | 17362911  | 17363081  | BZ048834  | BZ048834  | BZ048834  | 13 | 318 | 318 | 98  | 96 | 89 |
| 1881 | 20 | 18401461  | 18401663  | BZ041462  | BZ041462  | BZ041462  | 13 | 318 | 318 | 98  | 96 | 89 |
| 1882 | 20 | 20568461  | 20568636  | CC026619  | CC026619  | CC026619  | 13 | 331 | 331 | 98  | 96 | 89 |
| 1883 | 20 | 19592629  | 19592823  | CC059113  | CC059113  | CC059113  | 13 | 331 | 331 | 98  | 96 | 89 |
| 1884 | 20 | 21500799  | 21508255  | CC046709  | CC046709  | CC046709  | 13 | 331 | 331 | 98  | 96 | 89 |
| 1885 | 20 | 22229661  | 22229906  | BZ019357  | BZ019357  | BZ019357  | 13 | 331 | 331 | 98  | 96 | 89 |
| 1886 | 20 | 23348713  | 23348846  | CC032673  | CC032673  | CC032673  | 13 | 331 | 331 | 98  | 96 | 89 |
| 1887 | 20 | 2256380   | 22564003  | Y10811    | Y10811    | Y10811    | 13 | 339 | 339 | 98  | 96 | 89 |
| 1888 | 20 | 24472164  | 24472282  | CC082994  | CC082994  | CC082994  | 13 | 347 | 347 | 98  | 96 | 89 |
| 1889 | 20 | 5722648   | 5722843   | BZ070107  | BZ070107  | BZ070107  | 13 | 359 | 359 | 99  | 97 | 90 |
| 1890 | 20 | 5489750   | 5489802   | AW045566  | AW045566  | AW045566  | 13 | 359 | 359 | 99  | 97 | 90 |
| 1892 | 20 | 4404644   | 4404860   | CC078084  | CC078084  | CC078084  | 13 | 363 | 363 | 99  | 97 | 90 |
| 1893 | 20 | 2768199   | 2768072   | CC055191  | CC055191  | CC055191  | 13 | 367 | 367 | 99  | 97 | 90 |
| 1894 | 20 | 3884285   | 3884472   | BZ082161  | BZ082161  | BZ082161  | 13 | 371 | 371 | 99  | 97 | 90 |
| 1895 | 20 | 1611312   | 1611093   | CC052964  | CC052964  | CC052964  | 13 | 375 | 375 | 99  | 97 | 90 |
| 1896 | 20 | 1053013   | 1053153   | AW056149  | AW056149  | AW056149  | 13 | 375 | 375 | 99  | 97 | 90 |
| 1897 | 20 | 148819    | 149446    | CC082737  | CC082737  | CC082737  | 13 | 375 | 375 | 99  | 97 | 90 |
| 1898 | 20 | 7041250   | 7041401   | CC076776  | CC076776  | CC076776  | 13 | 383 | 383 | 100 | 98 | 91 |
| 1899 | 20 | 585236    | 585247    | 188551    | 188551    | 188551    | 13 | 383 | 383 | 100 | 98 | 91 |
| 1900 | 20 | 4785408   | 4785877   | BZ021973  | BZ021973  | BZ021973  | 13 | 383 | 383 | 100 | 98 | 91 |
| 1901 | 20 | 3995726   | 3995870   | BZ09470   | BZ09470   | BZ09470   | 13 | 391 | 391 | 100 | 98 | 91 |
| 1902 | 20 | 3152016   | 3152011   | AW029084  | AW029084  | AW029084  | 13 | 399 | 399 | 100 | 98 | 91 |
| 1903 | 20 | 2626452   | 2626989   | CC014264  | CC014264  | CC014264  | 13 | 399 | 399 | 100 | 98 | 91 |
| 1904 | 20 | 1742616   | 1742957   | CC049713  | CC049713  | CC049713  | 13 | 402 | 402 | 100 | 98 | 91 |
| 1905 | 20 | 2374515   | 2374712   | BZ090499  | BZ090499  | BZ090499  | 13 | 402 | 402 | 100 | 98 | 91 |
| 1906 | 20 | 6224452   | 62244836  | CC067737  | CC067737  | CC067737  | 13 | 406 | 406 | 100 | 98 | 91 |
| 1907 | 20 | 61417160  | 61417324  | CC003739  | CC003739  | CC003739  | 13 | 412 | 412 | 101 | 99 | 92 |
| 1908 | 20 | 60446077  | 60446362  | BZ075209  | BZ075209  | BZ075209  | 13 | 416 | 416 | 101 | 99 | 92 |
| 1909 | 20 | 9440611   | 9440701   | CC058412  | CC058412  | CC058412  | 13 | 417 | 417 | 101 | 99 | 92 |
| 1910 | 20 | 5837132   | 5837569   | CC085604  | CC085604  | CC085604  | 13 | 440 | 440 | 101 | 99 | 92 |
| 1911 | 20 | 57430401  | 57430851  | BZ044092  | BZ044092  | BZ044092  | 13 | 440 | 440 | 101 | 99 | 92 |
| 1912 | 20 | 5691961   | 5691961   | X03404    | X03404    | X03404    | 13 | 462 | 462 | 101 | 99 | 92 |
| 1914 | 20 | 56527141  | 56527602  | CC058887  | CC058887  | CC058887  | 13 |     |     |     |    |    |



|      |    |           |           |          |          |          |    |     |     |     |     |          |
|------|----|-----------|-----------|----------|----------|----------|----|-----|-----|-----|-----|----------|
| 2065 | 8  | 9172444   | 91721638  | CC587432 | CC587432 | CC587432 | 14 | 651 | 651 | 106 | 104 | 97       |
| 2066 | 8  | 9088158   | 9088838   | CC589878 | CC589878 | CC589878 | 14 | 656 | 656 | 106 | 104 | 97       |
| 2067 | 8  | 9084660   | 9084660   | CC54922  | CC54922  | CC54922  | 14 | 656 | 656 | 106 | 104 | 97       |
| 2068 | 8  | 89439276  | 89439511  | BZ69797  | BZ69797  | BZ69797  | 14 | 665 | 665 | 106 | 104 | 97       |
| 2069 | 8  | 8807896   | 8807878   | CC558033 | CC558033 | CC558033 | 14 | 680 | 680 | 106 | 104 | 97       |
| 2070 | 8  | 8645628   | 8645787   | AW359112 | AW359112 | AW359112 | 14 | 680 | 680 | 106 | 104 | 97       |
| 2071 | 8  | 8730679   | 8730691   | CC50929  | CC50929  | CC50929  | 14 | 680 | 680 | 106 | 104 | 97       |
| 2072 | 8  | 8536878   | 8536946   | CC10731  | CC10731  | CC10731  | 14 | 685 | 685 | 106 | 104 | 97       |
| 2073 | 8  | 8438394   | 8438348   | BZ68348  | BZ68348  | BZ68348  | 14 | 700 | 700 | 106 | 104 | 97       |
| 2074 | 8  | 8275300   | 8275402   | J05394   | J05394   | J05394   | 14 | 708 | 708 | 106 | 104 | 97       |
| 2075 | 11 | 10535052  | 10535055  | BZ04394  | BZ04394  | BZ04394  | 15 | 0   | 0   | 107 | 105 | 98       |
| 2076 | 11 | 10399003  | 10400017  | CC50722  | CC50722  | CC50722  | 15 | 0   | 0   | 107 | 105 | 98       |
| 2077 | 11 | 10377008  | 10377046  | BZ04149  | BZ04149  | BZ04149  | 15 | 18  | 18  | 107 | 105 | 98       |
| 2078 | 11 | 10295720  | 10295722  | BZ06687  | BZ06687  | BZ06687  | 15 | 24  | 24  | 107 | 105 | 98       |
| 2079 | 11 | 10174025  | 10174095  | AW20913  | AW20913  | AW20913  | 15 | 42  | 42  | 107 | 105 | 98       |
| 2080 | 11 | 10041744  | 10041828  | BZ03988  | BZ03988  | BZ03988  | 15 | 51  | 51  | 107 | 105 | 98       |
| 2081 | 11 | 99486633  | 99486755  | BZ027106 | BZ027106 | BZ027106 | 15 | 64  | 64  | 107 | 105 | 98       |
| 2082 | 11 | 98057943  | 98058502  | BZ055507 | BZ055507 | BZ055507 | 15 | 73  | 73  | 107 | 105 | 98       |
| 2083 | 11 | 97468044  | 97468208  | CC524771 | CC524771 | CC524771 | 15 | 83  | 83  | 107 | 105 | 98       |
| 2084 | 11 | 96432094  | 96432194  | BZ012680 | BZ012680 | BZ012680 | 15 | 90  | 90  | 107 | 105 | 98       |
| 2086 | 11 | 95141849  | 95142073  | AW437796 | AW437796 | AW437796 | 15 | 104 | 104 | 107 | 105 | 98       |
| 2087 | 11 | 95097962  | 95098033  | BZ055534 | BZ055534 | BZ055534 | 15 | 107 | 107 | 107 | 105 | 98       |
| 2088 | 11 | 94205732  | 94206216  | BZ041759 | BZ041759 | BZ041759 | 15 | 114 | 114 | 107 | 105 | 98       |
| 2089 | 11 | 106279226 | 106279419 | CC536484 | CC536484 | CC536484 | 15 | 117 | 117 | 108 | 106 | 99       |
| 2090 | 11 | 107119064 | 107119979 | BZ051933 | BZ051933 | BZ051933 | 15 | 121 | 121 | 108 | 106 | 99       |
| 2091 | 11 | 10859683  | 108598767 | BZ056575 | BZ056575 | BZ056575 | 15 | 127 | 127 | 108 | 106 | 99       |
| 2092 | 11 | 109838207 | 109838400 | D00471   | D00471   | D00471   | 15 | 152 | 152 | 108 | 106 | 99       |
| 2093 | 11 | 111252548 | 111252540 | BZ02157  | BZ02157  | BZ02157  | 15 | 164 | 164 | 108 | 106 | 99       |
| 2094 | 11 | 11147069  | 11147069  | L30987   | L30987   | L30987   | 15 | 168 | 168 | 108 | 106 | 99       |
| 2095 | 11 | 112353401 | 112353972 | BZ027848 | BZ027848 | BZ027848 | 15 | 185 | 185 | 108 | 106 | 99       |
| 2096 | 11 | 112651193 | 112651983 | X16451   | X16451   | X16451   | 15 | 188 | 188 | 108 | 106 | 99       |
| 2097 | 11 | 11628688  | 11628682  | BE217514 | BE217514 | BE217514 | 15 | 188 | 188 | 108 | 106 | 99       |
| 2098 | 11 | 113523776 | 113524252 | BZ099722 | BZ099722 | BZ099722 | 15 | 197 | 197 | 108 | 106 | 99       |
| 2099 | 11 | 114892040 | 114892100 | BZ07632  | BZ07632  | BZ07632  | 15 | 201 | 201 | 108 | 106 | 99       |
| 2100 | 11 | 11628819  | 11628882  | BE17430  | BE17430  | BE17430  | 15 | 206 | 206 | 108 | 106 | 99       |
| 2101 | 11 | 11621677  | 11621986  | AW26863  | AW26863  | AW26863  | 15 | 210 | 210 | 108 | 106 | 99       |
| 2102 | 11 | 11654346  | 11654400  | D49678   | D49678   | D49678   | 15 | 218 | 218 | 108 | 106 | 99       |
| 2103 | 11 | 11658477  | 11658504  | BZ041912 | BZ041912 | BZ041912 | 15 | 227 | 227 | 108 | 106 | 99       |
| 2104 | 11 | 1170222   | 11702604  | BZ09034  | BZ09034  | BZ09034  | 15 | 231 | 231 | 108 | 106 | 99       |
| 2105 | 11 | 11842698  | 118427043 | U3019    | U3019    | U3019    | 15 | 244 | 244 | 108 | 106 | 99       |
| 2106 | 11 | 11904612  | 119047264 | AW20917  | AW20917  | AW20917  | 15 | 252 | 252 | 108 | 106 | 99       |
| 2109 | 11 | 12095880  | 12096231  | BZ029011 | BZ029011 | BZ029011 | 15 | 264 | 264 | 108 | 106 | 99       |
| 2110 | 11 | 12170107  | 12170223  | BZ09693  | BZ09693  | BZ09693  | 15 | 268 | 268 | 108 | 106 | 99       |
| 2111 | 11 | 12300903  | 12300523  | CC545465 | CC545465 | CC545465 | 15 | 272 | 272 | 108 | 106 | 99       |
| 2112 | 11 | 18003675  | 18003700  | BZ049997 | BZ049997 | BZ049997 | 15 | 272 | 272 | 107 | 107 | detected |
| 2113 | 11 | 17966880  | AW417711  | AW417711 | AW417711 | AW417711 | 15 | 277 | 277 | 109 | 107 | detected |
| 2114 | 11 | 17308248  | 17308459  | AW428590 | AW428590 | AW428590 | 15 | 277 | 277 | 109 | 107 | detected |
| 2115 | 11 | 16732957  | 16734158  | BZ06721  | BZ06721  | BZ06721  | 15 | 286 | 286 | 109 | 107 | detected |
| 2116 | 11 | 15992965  | 15993462  | BZ01135  | BZ01135  | BZ01135  | 15 | 294 | 294 | 109 | 107 | detected |
| 2117 | 11 | 14739631  | 14739764  | BZ016579 | BZ016579 | BZ016579 | 15 | 302 | 302 | 109 | 107 | detected |
| 2118 | 11 | 13954314  | 13954630  | BZ07353  | BZ07353  | BZ07353  | 15 | 311 | 311 | 109 | 107 | detected |
| 2119 | 11 | 13368462  | 13367366  | AW44552  | AW44552  | AW44552  | 15 | 311 | 311 | 109 | 107 | detected |
| 2120 | 11 | 12138967  | 12139553  | BZ05567  | BZ05567  | BZ05567  | 15 | 319 | 319 | 109 | 107 | detected |
| 2121 | 11 | 11266744  | 11267044  | BZ040058 | BZ040058 | BZ040058 | 15 | 327 | 327 | 109 | 107 | detected |
| 2122 | 11 | 10275888  | 10276179  | BZ09975  | BZ09975  | BZ09975  | 15 | 331 | 331 | 109 | 107 | detected |
| 2123 | 11 | 914738    | 9148239   | BZ09834  | BZ09834  | BZ09834  | 15 | 335 | 335 | 109 | 107 | detected |
| 2124 | 11 | 8519726   | 8520139   | BZ001233 | BZ001233 | BZ001233 | 15 | 343 | 343 | 109 | 107 | detected |
| 2125 | 11 | 7124759   | 7124974   | BZ05804  | BZ05804  | BZ05804  | 15 | 355 | 355 | 109 | 107 | detected |
| 2126 | 11 | 6507130   | 6507951   | BE217530 | BE217530 | BE217530 | 15 | 364 | 364 | 109 | 107 | detected |
| 2127 | 11 | 5610085   | 5610256   | BZ032604 | BZ032604 | BZ032604 | 15 | 367 | 367 | 109 | 107 | detected |
| 2128 | 11 | 5204158   | 5204653   | X00776   | X00776   | X00776   | 15 | 371 | 371 | 109 | 107 | detected |
| 2129 | 11 | 497257    | 497257    | BZ035869 | BZ035869 | BZ035869 | 15 | 375 | 375 | 109 | 107 | detected |
| 2130 | 11 | 4116233   | 4116373   | AW24890  | AW24890  | AW24890  | 15 | 379 | 379 | 109 | 107 | detected |
| 2131 | 11 | 7120012   | 7120141   | BZ03482  | BZ03482  | BZ03482  | 15 | 390 | 390 | 109 | 107 | detected |
| 2132 | 11 | 7141319   | 71413424  | AW46368  | AW46368  | AW46368  | 15 | 397 | 397 | 109 | 107 | detected |
| 2133 | 11 | 7192154   | 7192155   | BZ09782  | BZ09782  | BZ09782  | 15 | 401 | 401 | 109 | 107 | detected |
| 2134 | 11 | 7222701   | 7222748   | X73790   | X73790   | X73790   | 15 | 401 | 401 | 109 | 107 | detected |
| 2135 | 11 | 7292209   | 7292179   | BZ042903 | BZ042903 | BZ042903 | 15 | 409 | 409 | 109 | 107 | detected |
| 2136 | 11 | 7394668   | 7394684   | AF02948  | AF02948  | AF02948  | 15 | 413 | 413 | 109 | 107 | detected |
| 2137 | 11 | 74838563  | 74838716  | BZ037307 | BZ037307 | BZ037307 | 15 | 431 | 431 | 109 | 107 | detected |
| 2138 | 11 | 7496070   | 7496993   | AW63706  | AW63706  | AW63706  | 15 | 431 | 431 | 109 | 107 | detected |
| 2140 | 11 | 7540181   | 7540181   | BZ03601  | BZ03601  | BZ03601  | 15 | 443 | 443 | 109 | 107 | detected |
| 2141 | 11 | 2628745   | 2628801   | BZ098298 | BZ098298 | BZ098298 | 15 | 455 | 455 | 109 | 107 | detected |
| 2142 | 11 | 2707492   | 2707512   | CC503764 | CC503764 | CC503764 | 15 | 467 | 467 | 111 | 109 | detected |
| 2143 | 11 | 2781716   | 2781742   | BZ03879  | BZ03879  | BZ03879  | 15 | 483 | 483 | 111 | 109 | detected |
| 2145 | 11 | 2819057   | 2817043   | BZ062707 | BZ062707 | BZ062707 | 15 | 494 | 494 | 109 | 107 | detected |
| 2146 | 11 | 2864690   | 2864788   | BZ000212 | BZ000212 | BZ000212 | 15 | 498 | 498 | 109 | 107 | detected |
| 2147 | 11 | 2866998   | 28661361  | BZ02512  | BZ02512  | BZ02512  | 15 | 505 | 505 | 109 | 107 | detected |
| 2148 | 11 | 2986866   | 2992125   | X57033   | X57033   | X57033   | 15 | 505 | 505 | 109 | 107 | detected |
| 2149 | 11 | 3037583   | 3037404   | BZ035672 | BZ035672 | BZ035672 | 15 | 509 | 509 | 109 | 107 | detected |
| 2150 | 11 | 3109420   | 3109844   | BZ03309  | BZ03309  | BZ03309  | 15 | 513 | 513 | 111 | 109 | detected |
| 2151 | 11 | 3208342   | 3208366   | AW26879  | AW26879  | AW26879  | 15 | 516 | 516 | 109 | 107 | detected |
| 2152 | 11 | 3242422   | 3242426   | BZ013019 | BZ013019 | BZ013019 | 15 | 524 | 524 | 111 | 109 | detected |
| 2153 | 11 | 3350915   | 3351028   | BZ051441 | BZ051441 | BZ051441 | 15 | 537 | 537 | 109 | 107 | detected |
| 2154 | 11 | 3381276   | 3381255   | BZ08190  | BZ08190  | BZ08190  | 15 | 546 | 546 | 109 | 107 | detected |
| 2155 | 11 | 3530750   | 3530752   | 863418   | 863418   | 863418   | 15 | 550 | 550 | 109 | 107 | detected |
| 2156 | 11 | 3529758   | 3529798   | BZ037718 | BZ037718 | BZ037718 | 15 | 550 | 550 | 109 | 107 | detected |
| 2158 | 11 | 3620800   | 3620842   | BZ031055 | BZ031055 | BZ031055 | 15 | 554 | 554 | 109 | 107 | detected |
| 2159 | 11 | 3745019   | 3745182   | BZ03029  | BZ03029  | BZ03029  | 15 | 554 | 554 | 109 | 107 | detected |
| 2160 | 11 | 3848414   | 3848853   | BZ031300 | BZ031300 | BZ031300 | 15 | 563 | 563 | 109 | 107 | detected |
| 2161 | 11 | 3956433   | 3956828   | BE17538  | BE17538  | BE17538  | 15 | 563 | 563 | 111 | 109 | detected |
| 2162 | 11 | 4007147   | 4007179   | CC44740  | CC44740  | CC44740  | 15 | 571 | 571 | 109 | 107 | detected |
| 2164 | 11 | 4190455   | 4190896   | BZ038943 | BZ038943 | BZ038943 | 15 | 576 | 576 | 109 | 107 | detected |
| 2165 | 11 | 4229794   | 4229814   | BZ03650  | BZ03650  | BZ03650  | 15 | 576 | 576 | 109 | 107 | detected |
| 2166 | 11 | 4366615   | 4366761   | BZ03289  | BZ03289  | BZ03289  | 15 | 576 | 576 | 109 | 107 | detected |
| 2168 | 11 | 4408501   | 4408736   | AF08748  | AF08748  | AF08748  | 15 | 596 | 596 | 109 | 107 | detected |
| 2169 | 11 | 4486037   | 4486705   | CC54789  | CC54789  | CC54789  | 15 | 607 | 607 | 111 | 109 | detected |
| 2171 | 11 | 4621363   | 4621292   | BZ01869  | BZ01869  | BZ01869  | 15 | 621 | 621 | 109 | 107 | detected |
| 2172 | 11 |           |           |          |          |          |    |     |     |     |     |          |

|      |    |           |           |           |           |           |    |     |     |     |     |     |
|------|----|-----------|-----------|-----------|-----------|-----------|----|-----|-----|-----|-----|-----|
| 2328 | 4  | 131554805 | 131555230 | CCS87165  | CCS87165  | CCS87165  | 17 | 319 | 319 | 126 | 121 | 114 |
| 2329 | 4  | 13802093  | 13802100  | CC41090   | CC41090   | CC41090   | 17 | 319 | 319 | 126 | 121 | 114 |
| 2330 | 4  | 129549153 | 129549636 | BE217446  | BE217446  | BE217446  | 17 | 322 | 322 | 126 | 121 | 114 |
| 2331 | 4  | 12808488  | 12808735  | BZ65634   | BZ65634   | BZ65634   | 17 | 322 | 322 | 126 | 121 | 114 |
| 2332 | 4  | 12885061  | 12885628  | CCS7916   | CCS7916   | CCS7916   | 17 | 326 | 326 | 126 | 121 | 114 |
| 2333 | 4  | 125949470 | 125950145 | BZ04360   | BZ04360   | BZ04360   | 17 | 330 | 330 | 126 | 121 | 114 |
| 2334 | 4  | 124764463 | 124764624 | BZ667931  | BZ667931  | BZ667931  | 17 | 330 | 330 | 126 | 121 | 114 |
| 2335 | 4  | 123730398 | 123730632 | M12791    | M12791    | M12791    | 17 | 330 | 330 | 126 | 121 | 114 |
| 2336 | 4  | 16278815  | 162789204 | CC770472  | CC770472  | CC770472  | 17 | 350 | 350 | 127 | 115 | 110 |
| 2337 | 4  | 161611778 | 161612345 | CCS00703  | CCS00703  | CCS00703  | 17 | 362 | 362 | 127 | 115 | 110 |
| 2339 | 4  | 160519596 | 160520221 | CC499519  | CC499519  | CC499519  | 17 | 377 | 377 | 127 | 115 | 110 |
| 2340 | 4  | 159957676 | 159957676 | L11668    | L11668    | L11668    | 17 | 377 | 377 | 127 | 115 | 110 |
| 2341 | 4  | 159359654 | 159359843 | CCS56740  | CCS56740  | CCS56740  | 17 | 384 | 384 | 127 | 115 | 110 |
| 2342 | 4  | 158446638 | 158490755 | BZ684847  | BZ684847  | BZ684847  | 17 | 397 | 397 | 127 | 115 | 110 |
| 2343 | 4  | 15736142  | 157363059 | BZ61467   | BZ61467   | BZ61467   | 17 | 409 | 409 | 127 | 115 | 110 |
| 2344 | 4  | 131891720 | 131891844 | AW267154  | AW267154  | AW267154  | 17 | 439 | 439 | 127 | 115 | 110 |
| 2345 | 4  | 13120333  | 13120426  | CCS29345  | CCS29345  | CCS29345  | 17 | 446 | 446 | 128 | 116 | 111 |
| 2346 | 4  | 130118154 | 130118225 | BZ63603   | BZ63603   | BZ63603   | 17 | 449 | 449 | 128 | 116 | 111 |
| 2347 | 12 | 12901980  | 129020040 | BZ65428   | BZ65428   | BZ65428   | 17 | 464 | 464 | 128 | 116 | 111 |
| 2348 | 12 | 127992329 | 127992508 | BZ014992  | BZ014992  | BZ014992  | 17 | 493 | 493 | 128 | 116 | 111 |
| 2349 | 12 | 126996765 | 126996954 | CC775508  | CC775508  | CC775508  | 17 | 499 | 499 | 128 | 116 | 111 |
| 2350 | 12 | 125816088 | 125817142 | CCS84599  | CCS84599  | CCS84599  | 17 | 502 | 502 | 128 | 116 | 111 |
| 2351 | 12 | 124899400 | 124899497 | BZ023723  | BZ023723  | BZ023723  | 17 | 505 | 505 | 128 | 116 | 111 |
| 2353 | 12 | 12373712  | 123735880 | CCS62433  | CCS62433  | CCS62433  | 17 | 518 | 518 | 128 | 116 | 111 |
| 2354 | 12 | 122661584 | 122662389 | BZ036180  | BZ036180  | BZ036180  | 17 | 518 | 518 | 128 | 116 | 111 |
| 2355 | 12 | 12159376  | 12159373  | CCS17369  | CCS17369  | CCS17369  | 17 | 527 | 527 | 128 | 116 | 111 |
| 2356 | 12 | 12066222  | 12066221  | CC762885  | CC762885  | CC762885  | 17 | 527 | 527 | 128 | 116 | 111 |
| 2357 | 12 | 11960612  | 11960692  | BZ649599  | BZ649599  | BZ649599  | 17 | 537 | 537 | 128 | 116 | 111 |
| 2358 | 12 | 11925458  | 11925587  | Y00120    | Y00120    | Y00120    | 17 | 540 | 540 | 128 | 116 | 111 |
| 2359 | 12 | 11778892  | 117788252 | BZ029323  | BZ029323  | BZ029323  | 17 | 540 | 540 | 128 | 116 | 111 |
| 2360 | 12 | 116408150 | 116408366 | CC769367  | CC769367  | CC769367  | 17 | 543 | 543 | 128 | 116 | 111 |
| 2361 | 12 | 115437862 | 115438153 | BZ090964  | BZ090964  | BZ090964  | 17 | 546 | 546 | 128 | 116 | 111 |
| 2362 | 12 | 114288073 | 114288366 | BZ090071  | BZ090071  | BZ090071  | 17 | 550 | 550 | 128 | 116 | 111 |
| 2363 | 12 | 113300007 | 113300339 | CC762218  | CC762218  | CC762218  | 17 | 550 | 550 | 128 | 116 | 111 |
| 2364 | 12 | 112173168 | 112173291 | CC499603  | CC499603  | CC499603  | 17 | 553 | 553 | 128 | 116 | 111 |
| 2365 | 12 | 11054531  | 110544212 | AW428602  | AW428602  | AW428602  | 17 | 560 | 560 | 128 | 116 | 111 |
| 2366 | 12 | 109148507 | 109148881 | BZ038971  | BZ038971  | BZ038971  | 17 | 566 | 566 | 128 | 116 | 111 |
| 2367 | 12 | 107990819 | 107990754 | CC771011  | CC771011  | CC771011  | 17 | 569 | 569 | 128 | 116 | 111 |
| 2368 | 12 | 10754135  | 107541676 | AW289449  | AW289449  | AW289449  | 17 | 583 | 583 | 128 | 116 | 111 |
| 2369 | 12 | 107542808 | 107543271 | AW289325  | AW289325  | AW289325  | 17 | 589 | 589 | 128 | 116 | 111 |
| 2370 | 12 | 106880032 | 106880262 | BZ085044  | BZ085044  | BZ085044  | 17 | 589 | 589 | 128 | 116 | 111 |
| 2371 | 22 | 2392768   | 2392765   | AW112529  | AW112529  | AW112529  | 17 | 599 | 599 | 128 | 116 | 111 |
| 2372 | 22 | 24434924  | 24435091  | M73216    | M73216    | M73216    | 17 | 599 | 599 | 129 | 117 | 112 |
| 2373 | 22 | 25787407  | 25787698  | BZ026003  | BZ026003  | BZ026003  | 17 | 609 | 609 | 129 | 117 | 112 |
| 2374 | 22 | 2585133   | 2685221   | CC481950  | CC481950  | CC481950  | 17 | 614 | 614 | 129 | 117 | 112 |
| 2376 | 22 | 27101889  | 27102271  | CCS84837  | CCS84837  | CCS84837  | 17 | 619 | 619 | 129 | 117 | 112 |
| 2377 | 22 | 28053686  | 28053775  | BZ692125  | BZ692125  | BZ692125  | 17 | 619 | 619 | 129 | 117 | 112 |
| 2378 | 22 | 28066284  | 2808511   | U63311    | U63311    | U63311    | 17 | 630 | 630 | 129 | 117 | 112 |
| 2379 | 22 | 2841458   | 2841594   | CCS03537  | CCS03537  | CCS03537  | 17 | 630 | 630 | 129 | 117 | 112 |
| 2380 | 22 | 30003557  | 30003976  | CCS83163  | CCS83163  | CCS83163  | 17 | 641 | 641 | 129 | 117 | 112 |
| 2381 | 22 | 30618004  | 30618199  | BZ61032   | BZ61032   | BZ61032   | 17 | 645 | 645 | 129 | 117 | 112 |
| 2382 | 22 | 30806866  | 30807186  | CCS43145  | CCS43145  | CCS43145  | 17 | 652 | 652 | 129 | 117 | 112 |
| 2383 | 22 | 23292334  | 23292785  | CC476601  | CC476601  | CC476601  | 17 | 690 | 690 | 130 | 118 | 113 |
| 2384 | 22 | 22450211  | 22450881  | AJ184253  | AJ184253  | AJ184253  | 17 | 697 | 697 | 130 | 118 | 113 |
| 2386 | 22 | 19676009  | 19677872  | NM_006767 | NM_006767 | NM_006767 | 17 | 705 | 705 | 130 | 118 | 113 |
| 2387 | 22 | 19280000  | 20280119  | BZ647359  | BZ647359  | BZ647359  | 17 | 709 | 709 | 130 | 118 | 113 |
| 2388 | 22 | 19566514  | 19568663  | NM_004782 | NM_004782 | NM_004782 | 17 | 709 | 709 | 130 | 118 | 113 |
| 2389 | 22 | 19129098  | 19121115  | BZ024710  | BZ024710  | BZ024710  | 17 | 713 | 713 | 130 | 118 | 113 |
| 2390 | 22 | 185246971 | 18524916  | AW462471  | AW462471  | AW462471  | 17 | 734 | 734 | 130 | 118 | 113 |
| 2391 | 22 | 1847912   | 18489842  | CCS34458  | CCS34458  | CCS34458  | 17 | 738 | 738 | 130 | 118 | 113 |
| 2392 | 22 | 17293033  | 17293236  | NM_009974 | NM_009974 | NM_009974 | 17 | 748 | 748 | 130 | 118 | 113 |
| 2393 | 16 | 68852469  | 68852413  | AW428609  | AW428609  | AW428609  | 18 | 0   | 0   | 129 | 117 | 112 |
| 2394 | 16 | 68923088  | 68923330  | AW425927  | AW425927  | AW425927  | 18 | 0   | 0   | 131 | 119 | 114 |
| 2395 | 16 | 68753784  | 68753877  | AA08013   | AA08013   | AA08013   | 18 | 3   | 3   | 131 | 119 | 114 |
| 2396 | 16 | 7477643   | 7477972   | CC770793  | CC770793  | CC770793  | 18 | 8   | 8   | 132 | 120 | 115 |
| 2398 | 16 | 74245625  | 74245790  | CCS64655  | CCS64655  | CCS64655  | 18 | 26  | 26  | 132 | 120 | 115 |
| 2399 | 16 | 75306620  | 75306985  | BZ043242  | BZ043242  | BZ043242  | 18 | 26  | 26  | 132 | 120 | 115 |
| 2400 | 16 | 76429259  | 76429694  | BZ060652  | BZ060652  | BZ060652  | 18 | 32  | 32  | 132 | 120 | 115 |
| 2401 | 16 | 7662184   | 7662203   | U22298    | U22298    | U22298    | 18 | 44  | 44  | 132 | 120 | 115 |
| 2402 | 16 | 78597864  | 78597980  | CCS94487  | CCS94487  | CCS94487  | 18 | 44  | 44  | 132 | 120 | 115 |
| 2403 | 16 | 79602322  | 79603311  | CCS84546  | CCS84546  | CCS84546  | 18 | 63  | 63  | 132 | 120 | 115 |
| 2404 | 16 | 8077101   | 8077320   | BZ645199  | BZ645199  | BZ645199  | 18 | 73  | 73  | 132 | 120 | 115 |
| 2406 | 16 | 81183286  | 81183489  | BZ677608  | BZ677608  | BZ677608  | 18 | 83  | 83  | 132 | 120 | 115 |
| 2408 | 16 | 82177432  | 82177771  | BZ888720  | BZ888720  | BZ888720  | 18 | 101 | 101 | 132 | 120 | 115 |
| 2409 | 16 | 82741233  | 82741489  | CCS73057  | CCS73057  | CCS73057  | 18 | 108 | 108 | 132 | 120 | 115 |
| 2410 | 16 | 84843864  | 84843943  | CCS18201  | CCS18201  | CCS18201  | 18 | 117 | 117 | 132 | 120 | 115 |
| 2411 | 16 | 84842871  | 84842990  | BZ011650  | BZ011650  | BZ011650  | 18 | 117 | 117 | 132 | 120 | 115 |
| 2412 | 16 | 85996486  | 85996828  | BZ091889  | BZ091889  | BZ091889  | 18 | 124 | 124 | 132 | 120 | 115 |
| 2413 | 16 | 87096039  | 87096239  | CCS89619  | CCS89619  | CCS89619  | 18 | 124 | 124 | 132 | 120 | 115 |
| 2414 | 16 | 88289496  | 88289587  | AW487657  | AW487657  | AW487657  | 18 | 127 | 127 | 132 | 120 | 115 |
| 2415 | 16 | 33853867  | 33854340  | CC767636  | CC767636  | CC767636  | 18 | 131 | 131 | 132 | 120 | 115 |
| 2416 | 16 | 45260305  | 45260400  | BZ675566  | BZ675566  | BZ675566  | 18 | 134 | 134 | 132 | 120 | 115 |
| 2418 | 16 | 46291182  | 46291465  | AW654244  | AW654244  | AW654244  | 18 | 153 | 153 | 133 | 121 | 116 |
| 2419 | 16 | 47130224  | 47130279  | AW357770  | AW357770  | AW357770  | 18 | 169 | 169 | 133 | 121 | 116 |
| 2420 | 16 | 48199046  | 48199165  | CC478158  | CC478158  | CC478158  | 18 | 177 | 177 | 133 | 121 | 116 |
| 2421 | 16 | 49198673  | 49198984  | CCS44003  | CCS44003  | CCS44003  | 18 | 177 | 177 | 133 | 121 | 116 |
| 2422 | 16 | 50301614  | 50301929  | BZ044003  | BZ044003  | BZ044003  | 18 | 181 | 181 | 133 | 121 | 116 |
| 2423 | 16 | 51352305  | 51352316  | BZ046536  | BZ046536  | BZ046536  | 18 | 201 | 201 | 133 | 121 | 116 |
| 2424 | 16 | 5237361   | 52373968  | CCS56266  | CCS56266  | CCS56266  | 18 | 222 | 222 | 133 | 121 | 116 |
| 2425 | 16 | 5343878   | 53438778  | CCS26403  | CCS26403  | CCS26403  | 18 | 222 | 222 | 133 | 121 | 116 |
| 2427 | 16 | 54095751  | 54097211  | AW659176  | AW659176  | AW659176  | 18 | 226 | 226 | 133 | 121 | 116 |
| 2428 | 16 | 54248384  | 54248384  | X79015    | X79015    | X79015    | 18 | 228 | 228 | 133 | 121 | 116 |
| 2429 | 16 | 54953726  | 54953916  | AW478071  | AW478071  | AW478071  | 18 | 250 | 250 | 133 | 121 | 116 |
| 2430 | 16 | 55708859  | 55709031  | CCS59807  | CCS59807  | CCS59807  | 18 | 258 | 258 | 133 | 121 | 116 |
| 2431 | 16 | 56068716  | 56068866  | BZ025203  | BZ025203  | BZ025203  | 18 | 267 | 267 | 133 | 121 | 116 |
| 2432 | 16 | 57614369  | 57614619  | BZ011989  |           |           |    |     |     |     |     |     |

|      |   |           |           |          |          |          |    |     |     |     |     |     |
|------|---|-----------|-----------|----------|----------|----------|----|-----|-----|-----|-----|-----|
| 2585 | 5 | 170156927 | 170157178 | BZ283716 | BZ283716 | BZ283716 | 20 | 25  | 25  | 145 | 140 | 131 |
| 2586 | 5 | 171221131 | 17120243  | CC525673 | CC525673 | CC525673 | 20 | 28  | 28  | 145 | 140 | 131 |
| 2587 | 5 | 172291964 | 172291955 | BZ270995 | BZ270995 | BZ270995 | 20 | 50  | 50  | 145 | 140 | 131 |
| 2588 | 5 | 172471873 | 172471235 | BZ249143 | BZ249143 | BZ249143 | 20 | 50  | 50  | 145 | 140 | 131 |
| 2589 | 5 | 172485862 | 172484617 | CC777008 | CC777008 | CC777008 | 20 | 53  | 53  | 145 | 140 | 131 |
| 2591 | 5 | 173292015 | 173292081 | CC532530 | CC532530 | CC532530 | 20 | 70  | 70  | 145 | 140 | 131 |
| 2593 | 5 | 74049828  | 74049999  | AW289200 | AW289200 | AW289200 | 20 | 99  | 99  | 145 | 140 | 131 |
| 2594 | 5 | 7298406   | 7298691   | BZ27566  | BZ27566  | BZ27566  | 20 | 102 | 102 | 146 | 141 | 132 |
| 2595 | 5 | 7181975   | 7181999   | BZ26145  | BZ26145  | BZ26145  | 20 | 106 | 106 | 146 | 141 | 132 |
| 2596 | 5 | 70888475  | 70888526  | CC500233 | CC500233 | CC500233 | 20 | 106 | 106 | 146 | 141 | 132 |
| 2597 | 5 | 70279399  | 70274137  | AF035323 | AF035323 | AF035323 | 20 | 109 | 109 | 146 | 141 | 132 |
| 2598 | 5 | 67519912  | 6751128   | BZ280812 | BZ280812 | BZ280812 | 20 | 116 | 116 | 146 | 141 | 132 |
| 2599 | 5 | 67584161  | 67584175  | BZ279837 | BZ279837 | BZ279837 | 20 | 119 | 119 | 146 | 141 | 132 |
| 2600 | 5 | 66880399  | 66880705  | CC482374 | CC482374 | CC482374 | 20 | 123 | 123 | 146 | 141 | 132 |
| 2601 | 5 | 6542640   | 6542576   | CC547620 | CC547620 | CC547620 | 20 | 138 | 138 | 146 | 141 | 132 |
| 2602 | 5 | 6511666   | 65112472  | AW289180 | AW289180 | AW289180 | 20 | 138 | 138 | 146 | 141 | 132 |
| 2603 | 5 | 64533041  | 64533332  | CC523832 | CC523832 | CC523832 | 20 | 145 | 145 | 146 | 141 | 132 |
| 2604 | 5 | 63497077  | 63497408  | CC566529 | CC566529 | CC566529 | 20 | 157 | 157 | 146 | 141 | 132 |
| 2605 | 5 | 62403744  | 62403412  | CC529092 | CC529092 | CC529092 | 20 | 161 | 161 | 146 | 141 | 132 |
| 2606 | 5 | 61801692  | 61802055  | CC563347 | CC563347 | CC563347 | 20 | 169 | 169 | 146 | 141 | 132 |
| 2607 | 5 | 61722450  | 61722560  | AW289315 | AW289315 | AW289315 | 20 | 177 | 177 | 146 | 141 | 132 |
| 2608 | 5 | 60983223  | 60983491  | CC586997 | CC586997 | CC586997 | 20 | 187 | 187 | 146 | 141 | 132 |
| 2610 | 5 | 59978938  | 59979198  | CC533683 | CC533683 | CC533683 | 20 | 195 | 195 | 146 | 141 | 132 |
| 2611 | 5 | 59053325  | 59054001  | CC01841  | CC01841  | CC01841  | 20 | 199 | 199 | 146 | 141 | 132 |
| 2612 | 5 | 58251252  | 58251971  | CC488301 | CC488301 | CC488301 | 20 | 210 | 210 | 146 | 141 | 132 |
| 2613 | 5 | 57157627  | 57157781  | CC566568 | CC566568 | CC566568 | 20 | 220 | 220 | 146 | 141 | 132 |
| 2614 | 5 | 56191236  | 56191587  | CC472921 | CC472921 | CC472921 | 20 | 220 | 220 | 146 | 141 | 132 |
| 2615 | 5 | 55095567  | 55095687  | CC935532 | CC935532 | CC935532 | 20 | 223 | 223 | 146 | 141 | 132 |
| 2616 | 5 | 5405474   | 54059752  | CC542419 | CC542419 | CC542419 | 20 | 226 | 226 | 146 | 141 | 132 |
| 2617 | 5 | 53217339  | 53217512  | AW244894 | AW244894 | AW244894 | 20 | 230 | 230 | 146 | 141 | 132 |
| 2618 | 5 | 52809860  | 52810128  | CC747406 | CC747406 | CC747406 | 20 | 233 | 233 | 146 | 141 | 132 |
| 2619 | 5 | 5238756   | 52387739  | L25866   | L25866   | L25866   | 20 | 233 | 233 | 146 | 141 | 132 |
| 2621 | 5 | 51877403  | 51877925  | CC526556 | CC526556 | CC526556 | 20 | 244 | 244 | 146 | 141 | 132 |
| 2622 | 5 | 50892409  | 50892537  | CC589443 | CC589443 | CC589443 | 20 | 248 | 248 | 146 | 141 | 132 |
| 2623 | 5 | 49676201  | 49676297  | CC521543 | CC521543 | CC521543 | 20 | 260 | 260 | 146 | 141 | 132 |
| 2624 | 5 | 48565417  | 48565743  | CC488096 | CC488096 | CC488096 | 20 | 275 | 275 | 146 | 141 | 132 |
| 2625 | 5 | 46539610  | 46539836  | BZ030455 | BZ030455 | BZ030455 | 20 | 278 | 278 | 146 | 141 | 132 |
| 2626 | 5 | 44601652  | 44601922  | CC545088 | CC545088 | CC545088 | 20 | 294 | 294 | 146 | 141 | 132 |
| 2627 | 5 | 43691696  | 43691936  | L02543   | L02543   | L02543   | 20 | 309 | 309 | 146 | 141 | 132 |
| 2628 | 5 | 42835975  | 42836400  | D25220   | D25220   | D25220   | 20 | 320 | 320 | 146 | 141 | 132 |
| 2629 | 5 | 41841384  | 41841625  | BZ039302 | BZ039302 | BZ039302 | 20 | 330 | 330 | 146 | 141 | 132 |
| 2630 | 5 | 40803252  | 40803698  | CC572194 | CC572194 | CC572194 | 20 | 330 | 330 | 146 | 141 | 132 |
| 2631 | 5 | 39791738  | 39792359  | CC525812 | CC525812 | CC525812 | 20 | 333 | 333 | 146 | 141 | 132 |
| 2632 | 5 | 38967663  | 38967899  | BZ034737 | BZ034737 | BZ034737 | 20 | 357 | 357 | 146 | 141 | 132 |
| 2633 | 5 | 37869056  | 37869267  | BZ015127 | BZ015127 | BZ015127 | 20 | 357 | 357 | 146 | 141 | 132 |
| 2634 | 5 | 37038912  | 37039253  | CC589115 | CC589115 | CC589115 | 20 | 374 | 374 | 146 | 141 | 132 |
| 2635 | 5 | 35869502  | 35869712  | BZ286635 | BZ286635 | BZ286635 | 20 | 383 | 383 | 146 | 141 | 132 |
| 2636 | 5 | 34858790  | 34858949  | BZ266925 | BZ266925 | BZ266925 | 20 | 387 | 387 | 146 | 141 | 132 |
| 2637 | 5 | 33841801  | 33841935  | CC596142 | CC596142 | CC596142 | 20 | 397 | 397 | 146 | 141 | 132 |
| 2638 | 5 | 32850639  | 32850784  | BZ279841 | BZ279841 | BZ279841 | 20 | 425 | 425 | 146 | 141 | 132 |
| 2639 | 5 | 31773408  | 31773701  | CC510228 | CC510228 | CC510228 | 20 | 447 | 447 | 146 | 141 | 132 |
| 2640 | 5 | 30668667  | 30669180  | CC587609 | CC587609 | CC587609 | 20 | 464 | 464 | 146 | 141 | 132 |
| 2641 | 5 | 29608752  | 29609339  | BZ031717 | BZ031717 | BZ031717 | 20 | 478 | 478 | 146 | 141 | 132 |
| 2643 | 5 | 28399104  | 28399418  | CC488860 | CC488860 | CC488860 | 20 | 492 | 492 | 146 | 141 | 132 |
| 2644 | 5 | 27167900  | 27168200  | CC587251 | CC587251 | CC587251 | 20 | 505 | 505 | 146 | 141 | 132 |
| 2645 | 5 | 26217446  | 26217799  | CC532599 | CC532599 | CC532599 | 20 | 509 | 509 | 146 | 141 | 132 |
| 2646 | 5 | 24867009  | 24867105  | CC524554 | CC524554 | CC524554 | 20 | 533 | 533 | 146 | 141 | 132 |
| 2647 | 5 | 24547129  | 24547383  | AF013085 | AF013085 | AF013085 | 20 | 540 | 540 | 146 | 141 | 132 |
| 2648 | 5 | 23857409  | 23857883  | BZ014829 | BZ014829 | BZ014829 | 20 | 543 | 543 | 146 | 141 | 132 |
| 2649 | 5 | 22535922  | 22536200  | CC493750 | CC493750 | CC493750 | 20 | 564 | 564 | 146 | 141 | 132 |
| 2650 | 5 | 21449012  | 21449156  | CC520996 | CC520996 | CC520996 | 20 | 590 | 590 | 146 | 141 | 132 |
| 2651 | 5 | 20258203  | 20258203  | BZ264099 | BZ264099 | BZ264099 | 20 | 600 | 600 | 146 | 141 | 132 |
| 2652 | 5 | 19264976  | 19265121  | CC501934 | CC501934 | CC501934 | 20 | 607 | 607 | 146 | 141 | 132 |
| 2653 | 5 | 18279173  | 18279496  | BZ027231 | BZ027231 | BZ027231 | 20 | 614 | 614 | 146 | 141 | 132 |
| 2654 | 5 | 16877163  | 16877398  | BZ262031 | BZ262031 | BZ262031 | 20 | 627 | 627 | 146 | 141 | 132 |
| 2655 | 5 | 17329613  | 17329683  | BZ027273 | BZ027273 | BZ027273 | 20 | 637 | 637 | 146 | 141 | 132 |
| 2657 | 5 | 13967562  | 13967913  | CC578133 | CC578133 | CC578133 | 20 | 675 | 675 | 146 | 141 | 132 |
| 2658 | 5 | 12943668  | 12943918  | CC556510 | CC556510 | CC556510 | 20 | 683 | 683 | 146 | 141 | 132 |
| 2659 | 5 | 11814739  | 11814799  | CC560395 | CC560395 | CC560395 | 20 | 699 | 699 | 146 | 141 | 132 |
| 2661 | 5 | 10581252  | 10581624  | BZ026035 | BZ026035 | BZ026035 | 20 | 724 | 724 | 146 | 141 | 132 |
| 2662 | 5 | 9906549   | 9906611   | BZ04162  | BZ04162  | BZ04162  | 20 | 737 | 737 | 146 | 141 | 132 |
| 2663 | 5 | 9006763   | 9006808   | CC481538 | CC481538 | CC481538 | 20 | 752 | 752 | 146 | 141 | 132 |
| 2664 | 5 | 7573878   | 7574070   | CC541236 | CC541236 | CC541236 | 20 | 752 | 752 | 146 | 141 | 132 |
| 2665 | 5 | 6307578   | 6307866   | CC564722 | CC564722 | CC564722 | 20 | 760 | 760 | 146 | 141 | 132 |
| 2666 | 5 | 5506155   | 5506009   | CC479930 | CC479930 | CC479930 | 20 | 767 | 767 | 146 | 141 | 132 |
| 2667 | 5 | 441934    | 4419177   | CC711203 | CC711203 | CC711203 | 20 | 775 | 775 | 146 | 141 | 132 |
| 2669 | 5 | 3507587   | 3507859   | CC503913 | CC503913 | CC503913 | 20 | 775 | 775 | 146 | 141 | 132 |
| 2670 | 5 | 2343951   | 2344261   | CC573749 | CC573749 | CC573749 | 20 | 783 | 783 | 146 | 141 | 132 |
| 2671 | 5 | 23074     | 23080     | BZ062065 | BZ062065 | BZ062065 | 20 | 814 | 814 | 146 | 141 | 132 |
| 2672 | 5 | 21625068  | 21625376  | BZ032701 | BZ032701 | BZ032701 | 20 | 0   | 0   | 147 | 142 | 133 |
| 2673 | 5 | 2279391   | 22794601  | AW289286 | AW289286 | AW289286 | 21 | 3   | 3   | 147 | 143 | 133 |
| 2674 | 5 | 22954846  | 22954846  | CC492289 | CC492289 | CC492289 | 21 | 3   | 3   | 147 | 143 | 133 |
| 2676 | 5 | 23202684  | 23202987  | BZ288341 | BZ288341 | BZ288341 | 21 | 3   | 3   | 147 | 143 | 133 |
| 2677 | 5 | 9963268   | 9963444   | BZ834030 | BZ834030 | BZ834030 | 21 | 119 | 119 | 148 | 143 | 134 |
| 2678 | 5 | 9728245   | 9728329   | U31122   | U31122   | U31122   | 21 | 143 | 143 | 148 | 143 | 134 |
| 2679 | 5 | 9631668   | 9631668   | BZ081462 | BZ081462 | BZ081462 | 21 | 151 | 151 | 148 | 143 | 134 |
| 2680 | 5 | 9532283   | 9532317   | BZ261796 | BZ261796 | BZ261796 | 21 | 155 | 155 | 148 | 143 | 134 |
| 2682 | 5 | 9435703   | 9435706   | BZ032575 | BZ032575 | BZ032575 | 21 | 155 | 155 | 148 | 143 | 134 |
| 2683 | 5 | 9323206   | 9323235   | BZ262392 | BZ262392 | BZ262392 | 21 | 163 | 163 | 148 | 143 | 134 |
| 2684 | 5 | 92278637  | 92278879  | CC588559 | CC588559 | CC588559 | 21 | 166 | 166 | 148 | 143 | 134 |
| 2685 | 5 | 91297594  | 91297902  | CC469826 | CC469826 | CC469826 | 21 | 170 | 170 | 148 | 143 | 134 |
| 2686 | 5 | 90131496  | 90131598  | BZ289745 | BZ289745 | BZ289745 | 21 | 187 | 187 | 148 | 143 | 134 |
| 2687 | 5 | 89018425  | 89018917  | CC477951 | CC477951 | CC477951 | 21 | 187 | 187 | 148 | 143 | 134 |
| 2688 | 5 | 8406006   | 8406166   | CC539338 | CC539338 | CC539338 | 21 | 191 | 191 | 149 | 144 | 135 |
| 2689 | 5 | 86992304  | 86993320  | CC471417 | CC471417 | CC471417 | 21 | 211 | 211 | 149 | 144 | 135 |
| 2690 | 5 | 8242348   | 82423709  | S80443   | S80443   | S80443   | 21 | 216 | 216 | 149 | 144 | 135 |
| 2691 | 5 | 80881754  | 80881999  | CC563473 | CC563473 |          |    |     |     |     |     |     |

|      |   |          |          |          |          |          |    |     |     |     |     |     |
|------|---|----------|----------|----------|----------|----------|----|-----|-----|-----|-----|-----|
| 2851 | 3 | 13402808 | 13402999 | BZ09105  | BZ09105  | BZ09105  | 22 | 770 | 770 | 159 | 154 | 145 |
| 2852 | 3 | 13407834 | 13407834 | X70019   | X70019   | X70019   | 22 | 789 | 789 | 160 | 159 | 146 |
| 2853 | 3 | 12881073 | 12881054 | AW354958 | AW354958 | AW354958 | 22 | 810 | 810 | 160 | 155 | 146 |
| 2854 | 3 | 12820833 | 12820648 | CC488538 | CC488538 | CC488538 | 22 | 819 | 819 | 160 | 155 | 146 |
| 2855 | 3 | 54438088 | 54438228 | CC554778 | CC554778 | CC554778 | 23 | 0   | 0   | 161 | 156 | 147 |
| 2856 | 6 | 55411905 | 55412338 | BZ096558 | BZ096558 | BZ096558 | 23 | 7   | 7   | 161 | 156 | 147 |
| 2858 | 6 | 56437228 | 56437652 | CC553822 | CC553822 | CC553822 | 23 | 22  | 22  | 161 | 156 | 147 |
| 2859 | 6 | 50999225 | 57000067 | AW266887 | AW266887 | AW266887 | 23 | 32  | 32  | 161 | 156 | 147 |
| 2860 | 6 | 57466829 | 57466829 | CC496629 | CC496629 | CC496629 | 23 | 37  | 37  | 161 | 156 | 147 |
| 2861 | 6 | 58439018 | 58439084 | BZ046213 | BZ046213 | BZ046213 | 23 | 39  | 39  | 161 | 156 | 147 |
| 2862 | 6 | 62749778 | 62746183 | BZ030083 | BZ030083 | BZ030083 | 23 | 81  | 81  | 161 | 156 | 147 |
| 2863 | 6 | 33364960 | 33365651 | CC591860 | CC591860 | CC591860 | 23 | 108 | 108 | 162 | 157 | 148 |
| 2864 | 6 | 34177497 | 34177661 | CC520595 | CC520595 | CC520595 | 23 | 108 | 108 | 162 | 157 | 148 |
| 2865 | 6 | 35192318 | 35192808 | BZ052963 | BZ052963 | BZ052963 | 23 | 110 | 110 | 162 | 157 | 148 |
| 2866 | 6 | 36095224 | 36094902 | BZ052523 | BZ052523 | BZ052523 | 23 | 116 | 116 | 162 | 157 | 148 |
| 2867 | 6 | 37097212 | 37097400 | BZ066173 | BZ066173 | BZ066173 | 23 | 130 | 130 | 162 | 157 | 148 |
| 2869 | 6 | 38149103 | 38149195 | BZ052525 | BZ052525 | BZ052525 | 23 | 136 | 136 | 162 | 157 | 148 |
| 2870 | 6 | 38994981 | 38972255 | BZ088689 | BZ088689 | BZ088689 | 23 | 136 | 136 | 162 | 157 | 148 |
| 2871 | 6 | 39964344 | 39964514 | BZ033908 | BZ033908 | BZ033908 | 23 | 157 | 157 | 162 | 157 | 148 |
| 2872 | 6 | 41108495 | 41109164 | CC588514 | CC588514 | CC588514 | 23 | 171 | 171 | 162 | 157 | 148 |
| 2873 | 6 | 42142111 | 42142208 | BZ046044 | BZ046044 | BZ046044 | 23 | 174 | 174 | 162 | 157 | 148 |
| 2874 | 6 | 42237180 | 42237180 | BZ019541 | BZ019541 | BZ019541 | 23 | 189 | 189 | 162 | 157 | 148 |
| 2876 | 6 | 44381880 | 44384544 | CC527624 | CC527624 | CC527624 | 23 | 219 | 219 | 162 | 157 | 148 |
| 2877 | 6 | 45150878 | 45151526 | CC706902 | CC706902 | CC706902 | 23 | 224 | 224 | 162 | 157 | 148 |
| 2878 | 6 | 46237552 | 46237599 | CC492532 | CC492532 | CC492532 | 23 | 226 | 226 | 162 | 157 | 148 |
| 2879 | 6 | 47203219 | 47203351 | BZ048608 | BZ048608 | BZ048608 | 23 | 237 | 237 | 162 | 157 | 148 |
| 2880 | 6 | 48281512 | 48282220 | CC489788 | CC489788 | CC489788 | 23 | 245 | 245 | 162 | 157 | 148 |
| 2881 | 6 | 50687100 | 50687221 | CC526543 | CC526543 | CC526543 | 23 | 263 | 263 | 162 | 157 | 148 |
| 2882 | 6 | 49591284 | 49591483 | BZ022724 | BZ022724 | BZ022724 | 23 | 275 | 275 | 162 | 157 | 148 |
| 2883 | 6 | 51620781 | 51620877 | CC564262 | CC564262 | CC564262 | 23 | 287 | 287 | 162 | 157 | 148 |
| 2884 | 6 | 52248876 | 52249322 | AW289423 | AW289423 | AW289423 | 23 | 293 | 293 | 162 | 157 | 148 |
| 2885 | 6 | 52452366 | 52452536 | AW417159 | AW417159 | AW417159 | 23 | 293 | 293 | 162 | 157 | 148 |
| 2886 | 6 | 53240349 | 53240606 | AW347590 | AW347590 | AW347590 | 23 | 293 | 293 | 162 | 157 | 148 |
| 2887 | 6 | 3269874  | 3266116  | U09022   | U09022   | U09022   | 23 | 295 | 295 | 163 | 158 | 149 |
| 2888 | 6 | 31651047 | 3164571  | AP011926 | AP011926 | AP011926 | 23 | 301 | 301 | 163 | 158 | 149 |
| 2889 | 6 | 32259295 | 32259599 | W01212   | W01212   | W01212   | 23 | 307 | 307 | 163 | 158 | 149 |
| 2890 | 6 | 31062016 | 31062398 | CC770129 | CC770129 | CC770129 | 23 | 325 | 325 | 163 | 158 | 149 |
| 2891 | 6 | 30171413 | 30171666 | CC502313 | CC502313 | CC502313 | 23 | 356 | 356 | 163 | 158 | 149 |
| 2892 | 6 | 29269007 | 29269107 | BZ073607 | BZ073607 | BZ073607 | 23 | 356 | 356 | 163 | 158 | 149 |
| 2893 | 6 | 28128995 | 28129125 | CC774095 | CC774095 | CC774095 | 23 | 356 | 356 | 163 | 158 | 149 |
| 2894 | 6 | 27475655 | 27475806 | BZ083000 | BZ083000 | BZ083000 | 23 | 359 | 359 | 163 | 158 | 149 |
| 2895 | 6 | 26237142 | 26237142 | CC523412 | CC523412 | CC523412 | 23 | 359 | 359 | 163 | 158 | 149 |
| 2896 | 6 | 26020843 | 26021102 | CC521866 | CC521866 | CC521866 | 23 | 359 | 359 | 163 | 158 | 149 |
| 2897 | 6 | 24758972 | 24759066 | CC469880 | CC469880 | CC469880 | 23 | 371 | 371 | 163 | 158 | 149 |
| 2898 | 6 | 23675683 | 23675907 | BZ079663 | BZ079663 | BZ079663 | 23 | 375 | 375 | 163 | 158 | 149 |
| 2899 | 6 | 23353188 | 23353412 | BZ043535 | BZ043535 | BZ043535 | 23 | 375 | 375 | 163 | 158 | 149 |
| 2900 | 6 | 22359712 | 22359900 | CC549051 | CC549051 | CC549051 | 23 | 379 | 379 | 163 | 158 | 149 |
| 2902 | 6 | 21306201 | 21306372 | CC506269 | CC506269 | CC506269 | 23 | 387 | 387 | 163 | 158 | 149 |
| 2903 | 6 | 20292879 | 20292935 | CC475203 | CC475203 | CC475203 | 23 | 409 | 409 | 163 | 158 | 149 |
| 2904 | 6 | 19469047 | 19469202 | CC475636 | CC475636 | CC475636 | 23 | 411 | 411 | 163 | 158 | 149 |
| 2905 | 6 | 18401728 | 18407395 | BZ051620 | BZ051620 | BZ051620 | 23 | 415 | 415 | 163 | 158 | 149 |
| 2906 | 6 | 17220044 | 17220166 | CC579498 | CC579498 | CC579498 | 23 | 423 | 423 | 163 | 158 | 149 |
| 2907 | 6 | 16302126 | 16302393 | CC530122 | CC530122 | CC530122 | 23 | 426 | 426 | 163 | 158 | 149 |
| 2908 | 6 | 15256921 | 15257018 | CC507661 | CC507661 | CC507661 | 23 | 430 | 430 | 163 | 158 | 149 |
| 2909 | 6 | 14375445 | 14374895 | CC735678 | CC735678 | CC735678 | 23 | 430 | 430 | 163 | 158 | 149 |
| 2910 | 6 | 13175664 | 13175751 | BZ043444 | BZ043444 | BZ043444 | 23 | 441 | 441 | 163 | 158 | 149 |
| 2912 | 6 | 12089544 | 12089757 | BZ081180 | BZ081180 | BZ081180 | 23 | 457 | 457 | 163 | 158 | 149 |
| 2913 | 6 | 11103185 | 11103547 | CC548051 | CC548051 | CC548051 | 23 | 465 | 465 | 163 | 158 | 149 |
| 2914 | 6 | 10112928 | 10112928 | CC773631 | CC773631 | CC773631 | 23 | 465 | 465 | 163 | 158 | 149 |
| 2915 | 6 | 9064357  | 9064943  | BZ083137 | BZ083137 | BZ083137 | 23 | 477 | 477 | 163 | 158 | 149 |
| 2916 | 6 | 8114693  | 8114859  | CC554716 | CC554716 | CC554716 | 23 | 477 | 477 | 163 | 158 | 149 |
| 2917 | 6 | 7101837  | 7101996  | CC568662 | CC568662 | CC568662 | 23 | 489 | 489 | 163 | 158 | 149 |
| 2918 | 6 | 6189638  | 6189930  | CC513564 | CC513564 | CC513564 | 23 | 496 | 496 | 163 | 158 | 149 |
| 2919 | 6 | 5336919  | 5337245  | BZ086461 | BZ086461 | BZ086461 | 23 | 500 | 500 | 163 | 158 | 149 |
| 2920 | 6 | 4213719  | 4210273  | CC518276 | CC518276 | CC518276 | 23 | 507 | 507 | 163 | 158 | 149 |
| 2921 | 6 | 3482391  | 3485443  | CC477026 | CC477026 | CC477026 | 23 | 510 | 510 | 163 | 158 | 149 |
| 2922 | 6 | 2898914  | 2899958  | D56670   | D56670   | D56670   | 23 | 524 | 524 | 163 | 158 | 149 |
| 2923 | 6 | 2568201  | 2568330  | CC590141 | CC590141 | CC590141 | 23 | 534 | 534 | 163 | 158 | 149 |
| 2924 | 6 | 1562146  | 1562214  | CC507621 | CC507621 | CC507621 | 23 | 541 | 541 | 163 | 158 | 149 |
| 2925 | 6 | 341176   | 341407   | BZ016566 | BZ016566 | BZ016566 | 23 | 544 | 544 | 163 | 158 | 149 |
| 2926 | 6 | 7908352  | 7908392  | BZ056100 | BZ056100 | BZ056100 | 24 | 0   | 0   | 164 | 159 | 150 |
| 2927 | 6 | 7548208  | 7548492  | CC472793 | CC472793 | CC472793 | 24 | 3   | 3   | 164 | 159 | 150 |
| 2928 | 6 | 74107021 | 74107092 | CC543759 | CC543759 | CC543759 | 24 | 5   | 5   | 164 | 159 | 150 |
| 2929 | 6 | 7262337  | 7262531  | CC499301 | CC499301 | CC499301 | 24 | 20  | 20  | 164 | 159 | 150 |
| 2930 | 6 | 72349206 | 72349356 | BZ043012 | BZ043012 | BZ043012 | 24 | 20  | 20  | 164 | 159 | 150 |
| 2931 | 6 | 71442335 | 71442388 | BZ020065 | BZ020065 | BZ020065 | 24 | 14  | 14  | 164 | 159 | 150 |
| 2932 | 6 | 70273324 | 70273720 | CC517338 | CC517338 | CC517338 | 24 | 39  | 39  | 164 | 159 | 150 |
| 2933 | 6 | 69297120 | 69297389 | CC771709 | CC771709 | CC771709 | 24 | 54  | 54  | 164 | 159 | 150 |
| 2934 | 6 | 68218669 | 68218868 | BZ032869 | BZ032869 | BZ032869 | 24 | 63  | 63  | 164 | 159 | 150 |
| 2935 | 6 | 66983570 | 66984089 | BZ025654 | BZ025654 | BZ025654 | 24 | 74  | 74  | 164 | 159 | 150 |
| 2936 | 6 | 66084873 | 66085010 | BZ042223 | BZ042223 | BZ042223 | 24 | 74  | 74  | 164 | 159 | 150 |
| 2937 | 6 | 62559833 | 62559912 | CC515380 | CC515380 | CC515380 | 24 | 74  | 74  | 164 | 159 | 150 |
| 2938 | 6 | 63994484 | 63996613 | BZ083085 | BZ083085 | BZ083085 | 24 | 88  | 88  | 164 | 159 | 150 |
| 2939 | 6 | 63226284 | 63226675 | CC477190 | CC477190 | CC477190 | 24 | 91  | 91  | 164 | 159 | 150 |
| 2940 | 6 | 62250482 | 62251356 | CC766072 | CC766072 | CC766072 | 24 | 99  | 99  | 164 | 159 | 150 |
| 2941 | 6 | 61356176 | 61356176 | CC490776 | CC490776 | CC490776 | 24 | 115 | 115 | 164 | 159 | 150 |
| 2942 | 6 | 60263587 | 60263759 | BZ054264 | BZ054264 | BZ054264 | 24 | 115 | 115 | 164 | 159 | 150 |
| 2943 | 6 | 59104463 | 59104800 | CC765795 | CC765795 | CC765795 | 24 | 131 | 131 | 164 | 159 | 150 |
| 2944 | 6 | 58214239 | 58214925 | CC480923 | CC480923 | CC480923 | 24 | 131 | 131 | 164 | 159 | 150 |
| 2945 | 6 | 57371973 | 57372264 | BZ051733 | BZ051733 | BZ051733 | 24 | 131 | 131 | 164 | 159 | 150 |
| 2946 | 6 | 56217694 | 56218086 | BZ030578 | BZ030578 | BZ030578 | 24 | 137 | 137 | 164 | 159 | 150 |
| 2947 | 6 | 55214208 | 55214381 | CC581814 | CC581814 | CC581814 | 24 | 146 | 146 | 164 | 159 | 150 |
| 2948 | 6 | 54087067 | 54087245 | CC507633 | CC507633 | CC507633 | 24 | 152 | 152 | 164 | 159 | 150 |
| 2950 | 6 | 53133500 | 53133792 | CC495691 | CC495691 | CC495691 | 24 | 158 | 158 | 164 | 159 | 150 |
| 2951 | 6 | 52624808 | 52626097 | AW461557 | AW461557 | AW461557 | 24 | 161 | 161 | 164 | 159 | 150 |
| 2952 | 6 | 51943311 | 51943403 | BZ017451 | BZ017451 | BZ017451 | 24 | 167 | 167 | 164 | 159 | 150 |
| 2953 | 6 | 51859568 | 51859819 | BZ035847 | BZ035847 | BZ       |    |     |     |     |     |     |

|      |    |           |           |          |          |          |      |     |     |     |     |     |
|------|----|-----------|-----------|----------|----------|----------|------|-----|-----|-----|-----|-----|
| 3109 | 10 | 104854091 | 104856095 | CC473615 | CC473615 | CC473615 | 26   | 287 | 287 | 178 | 171 | 161 |
| 3110 | 10 | 104854091 | 104856095 | UT3969   | UT3969   | UT3969   | 26   | 291 | 291 | 178 | 171 | 161 |
| 3111 | 10 | 10545863  | 10545863  | CC593624 | CC593624 | CC593624 | 26   | 299 | 299 | 178 | 171 | 161 |
| 3112 | 10 | 106447315 | 106447315 | CC691695 | CC691695 | CC691695 | 26   | 309 | 309 | 178 | 171 | 161 |
| 3113 | 10 | 10745593  | 10745593  | CC585779 | CC585779 | CC585779 | 26   | 317 | 317 | 178 | 171 | 161 |
| 3114 | 10 | 108433028 | 108433028 | BZ041034 | BZ041034 | BZ041034 | 26   | 337 | 337 | 178 | 171 | 161 |
| 3115 | 10 | 109432965 | 109433101 | CC520635 | CC520635 | CC520635 | 26   | 382 | 382 | 178 | 171 | 161 |
| 3116 | 10 | 110379598 | 110376224 | BZ066535 | BZ066535 | BZ066535 | 26   | 394 | 394 | 178 | 171 | 161 |
| 3117 | 10 | 111435591 | 111451729 | CC466138 | CC466138 | CC466138 | 26   | 408 | 398 | 178 | 171 | 161 |
| 3119 | 10 | 112534607 | 112534218 | CC549607 | CC549607 | CC549607 | 26   | 405 | 405 | 178 | 171 | 161 |
| 3120 | 10 | 113571846 | 113572006 | BZ065995 | BZ065995 | BZ065995 | 26   | 405 | 405 | 178 | 171 | 161 |
| 3121 | 10 | 11428017  | 11428017  | AW209417 | AW209417 | AW209417 | 26   | 415 | 415 | 178 | 171 | 161 |
| 3122 | 10 | 115666115 | 115666931 | AF013092 | AF013092 | AF013092 | 26   | 437 | 437 | 178 | 171 | 161 |
| 3123 | 10 | 116463728 | 116463972 | CC603321 | CC603321 | CC603321 | 26   | 457 | 457 | 178 | 171 | 161 |
| 3124 | 10 | 117644162 | 117644670 | BZ069205 | BZ069205 | BZ069205 | 26   | 464 | 464 | 178 | 171 | 161 |
| 3125 | 10 | 118627668 | 118627827 | CC565193 | CC565193 | CC565193 | 26   | 467 | 467 | 178 | 171 | 161 |
| 3126 | 10 | 119541337 | 119541811 | BZ061918 | BZ061918 | BZ061918 | 26   | 470 | 470 | 178 | 171 | 161 |
| 3127 | 10 | 120444862 | 120444755 | AW327236 | AW327236 | AW327236 | 26   | 470 | 470 | 178 | 171 | 161 |
| 3128 | 10 | 121779890 | 121779890 | BZ069536 | BZ069536 | BZ069536 | 26   | 479 | 479 | 178 | 171 | 161 |
| 3129 | 10 | 122782825 | 122782825 | CC499337 | CC499337 | CC499337 | 26   | 477 | 477 | 178 | 171 | 161 |
| 3130 | 10 | 123842846 | 123843042 | CC475045 | CC475045 | CC475045 | 26   | 489 | 489 | 178 | 171 | 161 |
| 3131 | 10 | 124254043 | 124254042 | AW207015 | AW207015 | AW207015 | 26   | 489 | 489 | 178 | 171 | 161 |
| 3133 | 10 | 125013455 | 125013629 | BZ070511 | BZ070511 | BZ070511 | 26   | 499 | 499 | 178 | 171 | 161 |
| 3135 | 10 | 12579623  | 12576013  | CC098680 | CC098680 | CC098680 | 26   | 505 | 505 | 178 | 171 | 161 |
| 3136 | 10 | 12689991  | 12689991  | CC525452 | CC525452 | CC525452 | 26   | 516 | 516 | 178 | 171 | 161 |
| 3137 | 10 | 128027240 | 128027321 | CC572279 | CC572279 | CC572279 | 26   | 530 | 530 | 178 | 171 | 161 |
| 3138 | 10 | 129041946 | 129042509 | CC541563 | CC541563 | CC541563 | 26   | 534 | 534 | 178 | 171 | 161 |
| 3139 | 10 | 130253524 | 130253728 | BZ088017 | BZ088017 | BZ088017 | 26   | 537 | 537 | 178 | 171 | 161 |
| 3140 | 10 | 13110426  | 131104564 | BZ023326 | BZ023326 | BZ023326 | 26   | 551 | 551 | 178 | 171 | 161 |
| 3141 | 10 | 132249003 | 13226371  | BZ082266 | BZ082266 | BZ082266 | 26   | 565 | 565 | 178 | 171 | 161 |
| 3142 | 10 | 134383548 | 134383723 | CC487757 | CC487757 | CC487757 | 26   | 583 | 583 | 178 | 171 | 161 |
| 3143 | 10 | 135082542 | 135082665 | AW426122 | AW426122 | AW426122 | 26   | 589 | 589 | 178 | 171 | 161 |
| 3144 | 8  | 1802880   | 1802198   | BZ087871 | BZ087871 | BZ087871 | 27   | 0   | 0   | 172 | 172 | 162 |
| 3145 | 8  | 2819731   | 2819725   | BZ040888 | BZ040888 | BZ040888 | 27   | 0   | 0   | 179 | 179 | 162 |
| 3146 | 8  | 3553288   | 3553591   | CC467485 | CC467485 | CC467485 | 27   | 3   | 3   | 172 | 172 | 162 |
| 3147 | 8  | 4557931   | 4558202   | BZ046725 | BZ046725 | BZ046725 | 27   | 18  | 18  | 179 | 179 | 162 |
| 3148 | 8  | 5504815   | 5505037   | CC547920 | CC547920 | CC547920 | 27   | 48  | 48  | 172 | 172 | 162 |
| 3150 | 8  | 6347713   | 6348192   | AF094699 | AF094699 | AF094699 | 27   | 48  | 48  | 179 | 179 | 162 |
| 3151 | 8  | 6460728   | 6460978   | CC772376 | CC772376 | CC772376 | 27   | 71  | 71  | 172 | 172 | 162 |
| 3153 | 4  | 17699489  | 176994808 | BZ054808 | BZ054808 | BZ054808 | 27   | 122 | 122 | 180 | 180 | 163 |
| 3154 | 4  | 17780489  | 177805637 | CC561430 | CC561430 | CC561430 | 27   | 147 | 147 | 180 | 180 | 163 |
| 3155 | 4  | 178782844 | 178782811 | CC760073 | CC760073 | CC760073 | 27   | 162 | 162 | 173 | 173 | 163 |
| 3156 | 4  | 179837004 | 179837294 | CC519877 | CC519877 | CC519877 | 27   | 172 | 172 | 180 | 180 | 163 |
| 3157 | 4  | 180915181 | 180915006 | BZ010025 | BZ010025 | BZ010025 | 27   | 182 | 182 | 180 | 180 | 163 |
| 3158 | 4  | 181049230 | 181047899 | CC583383 | CC583383 | CC583383 | 27   | 187 | 187 | 180 | 180 | 163 |
| 3160 | 4  | 18382849  | 18380150  | BZ073245 | BZ073245 | BZ073245 | 27   | 208 | 208 | 180 | 180 | 163 |
| 3161 | 4  | 184794601 | 184794747 | BZ057437 | BZ057437 | BZ057437 | 27   | 213 | 213 | 173 | 173 | 163 |
| 3162 | 4  | 182884537 | 182884302 | CC768672 | CC768672 | CC768672 | 27   | 229 | 229 | 180 | 180 | 163 |
| 3163 | 4  | 18590782  | 18591120  | AW361113 | AW361113 | AW361113 | 27   | 235 | 235 | 173 | 173 | 163 |
| 3164 | 4  | 18641064  | 18641157  | MD1102   | MD1102   | MD1102   | 27   | 247 | 247 | 180 | 180 | 163 |
| 3166 | 4  | 187802372 | 187802522 | AW369600 | AW369600 | AW369600 | 27   | 272 | 272 | 180 | 180 | 163 |
| 3167 | 4  | 187097868 | 18709947  | BZ080622 | BZ080622 | BZ080622 | 27   | 282 | 282 | 173 | 173 | 163 |
| 3169 | 4  | 188950699 | 188950849 | CC506040 | CC506040 | CC506040 | 27   | 317 | 317 | 173 | 173 | 163 |
| 3170 | 4  | 189889935 | 18989352  | BZ33880  | BZ33880  | BZ33880  | 27   | 336 | 336 | 173 | 173 | 163 |
| 3171 | 8  | 1796119   | 17961260  | AW461077 | AW461077 | AW461077 | 27   | 362 | 362 | 181 | 181 | 164 |
| 3172 | 8  | 17452364  | 17453367  | CC529063 | CC529063 | CC529063 | 27   | 380 | 380 | 180 | 180 | 164 |
| 3173 | 8  | 17131136  | 1713170   | AW289341 | AW289341 | AW289341 | 27   | 385 | 385 | 181 | 181 | 164 |
| 3174 | 8  | 16508369  | 16508590  | BZ025252 | BZ025252 | BZ025252 | 27   | 389 | 389 | 181 | 181 | 164 |
| 3175 | 8  | 16642925  | 16642925  | XS4183   | XS4183   | XS4183   | 27   | 411 | 411 | 174 | 174 | 164 |
| 3177 | 8  | 15575788  | 15575788  | BZ066372 | BZ066372 | BZ066372 | 27   | 415 | 415 | 181 | 181 | 164 |
| 3178 | 8  | 1444792   | 14448102  | CC529930 | CC529930 | CC529930 | 27   | 415 | 415 | 174 | 174 | 164 |
| 3178 | 8  | 1344789   | 1344789   | CC507083 | CC507083 | CC507083 | 27   | 424 | 424 | 174 | 174 | 164 |
| 3179 | 8  | 12924410  | 12924587  | CC590187 | CC590187 | CC590187 | 27   | 428 | 428 | 181 | 181 | 164 |
| 3180 | 8  | 8219223   | 8219248   | CC488006 | CC488006 | CC488006 | 27   | 433 | 433 | 182 | 182 | 164 |
| 3181 | 8  | 9279110   | 9279244   | BZ061672 | BZ061672 | BZ061672 | 27   | 437 | 437 | 182 | 182 | 164 |
| 3182 | 8  | 2944072   | 2944768   | BZ070336 | BZ070336 | BZ070336 | 27   | 437 | 437 | 183 | 183 | 165 |
| 3183 | 8  | 30970680  | 30970726  | CC569958 | CC569958 | CC569958 | 27   | 437 | 437 | 183 | 183 | 165 |
| 3185 | 8  | 3202203   | 3203268   | BZ060711 | BZ060711 | BZ060711 | 27   | 451 | 451 | 183 | 183 | 165 |
| 3186 | 8  | 3303484   | 3303761   | BZ014972 | BZ014972 | BZ014972 | 27   | 456 | 456 | 183 | 183 | 165 |
| 3187 | 8  | 34043557  | 34043874  | CC484383 | CC484383 | CC484383 | 27   | 456 | 456 | 176 | 176 | 165 |
| 3188 | 8  | 35880930  | 35881421  | CC469562 | CC469562 | CC469562 | 27   | 464 | 464 | 176 | 176 | 165 |
| 3189 | 8  | 3609415   | 3609415   | CC522923 | CC522923 | CC522923 | 27   | 464 | 464 | 176 | 176 | 165 |
| 3190 | 8  | 37867937  | 37868426  | CC540934 | CC540934 | CC540934 | 27   | 473 | 473 | 176 | 176 | 165 |
| 3191 | 8  | 40598198  | 4059839   | CC584934 | CC584934 | CC584934 | 27   | 482 | 482 | 183 | 183 | 165 |
| 3192 | 8  | 3899782   | 3900006   | BZ046381 | BZ046381 | BZ046381 | 27   | 486 | 486 | 183 | 183 | 165 |
| 3193 | 8  | 3995972   | 3999468   | CC513112 | CC513112 | CC513112 | 27   | 490 | 490 | 183 | 183 | 165 |
| 3194 | 8  | 41487585  | 41487566  | AW289269 | AW289269 | AW289269 | 27   | 504 | 504 | 183 | 183 | 165 |
| 3197 | 8  | 4190818   | 4190919   | AW358694 | AW358694 | AW358694 | 27   | 520 | 520 | 183 | 183 | 165 |
| 3198 | 8  | 41691667  | 41691628  | BZ043882 | BZ043882 | BZ043882 | 27   | 526 | 526 | 176 | 176 | 165 |
| 3200 | 8  | 42421261  | 42421465  | AW464753 | AW464753 | AW464753 | 27   | 536 | 536 | 183 | 183 | 165 |
| 3201 | 8  | 42692485  | 42692563  | CC63114  | CC63114  | CC63114  | 27   | 536 | 536 | 183 | 183 | 165 |
| 3202 | 8  | 43121222  | 43121464  | CC548187 | CC548187 | CC548187 | 27   | 541 | 541 | 183 | 183 | 165 |
| 3203 | 8  | 18648666  | 18648987  | BZ042895 | BZ042895 | BZ042895 | 27   | 541 | 541 | 184 | 184 | 165 |
| 3204 | 8  | 19724217  | 19724324  | CC498750 | CC498750 | CC498750 | 27   | 545 | 545 | 177 | 177 | 165 |
| 3205 | 3  | 27194781  | 27195244  | BZ019176 | BZ019176 | BZ019176 | 27   | 545 | 545 | 180 | 180 | 165 |
| 3208 | 3  | 21378815  | 2138111   | BZ028615 | BZ028615 | BZ028615 | 27   | 596 | 596 | 185 | 185 | 166 |
| 3209 | 3  | 21775795  | 21776118  | BZ022514 | BZ022514 | BZ022514 | 27   | 590 | 590 | 178 | 178 | 166 |
| 3210 | 3  | 2484613   | 2484832   | BZ013729 | BZ013729 | BZ013729 | 27   | 609 | 609 | 185 | 185 | 166 |
| 3211 | 3  | 2562485   | 2562478   | CC526260 | CC526260 | CC526260 | 27   | 619 | 619 | 185 | 185 | 166 |
| 3212 | 3  | 2590208   | 2590303   | BZ056184 | BZ056184 | BZ056184 | 27   | 628 | 628 | 178 | 178 | 166 |
| 3213 | 1  | 22581602  | 22589170  | BZ009094 | BZ009094 | BZ009094 | 28   | 0   | 0   | 186 | 186 | 166 |
| 3214 | 1  | 22072429  | 22072492  | AW464955 | AW464955 | AW464955 | 28   | 146 | 146 | 179 | 179 | 166 |
| 3216 | 1  | 228451070 | 228451407 | CC762568 | CC762568 | CC762568 | 28   | 55  | 55  | 179 | 179 | 166 |
| 3217 | 1  | 22980259  | 22980304  | BZ042524 | BZ042524 | BZ042524 | 28   | 71  | 71  | 186 | 186 | 166 |
| 3218 | 1  | 23080977  | 23080974  | BZ080682 | BZ080682 | BZ080682 | 28   | 81  | 81  | 179 | 179 | 166 |
| 3219 | 1  | 23162841  | 23162216  | BZ041881 | BZ041881 | BZ041881 | 28</ |     |     |     |     |     |

|      |   |           |           |          |          |          |   |      |      |     |     |
|------|---|-----------|-----------|----------|----------|----------|---|------|------|-----|-----|
| 3375 | X | 96723208  | 96723833  | BZ256917 | BZ256917 | BZ256917 | X | 797  | 797  | 196 | 189 |
| 3376 | X | 97887967  | 9788853   | CC270389 | CC270389 | CC270389 | X | 816  | 816  | 196 | 176 |
| 3377 | X | 98099668  | 9809997   | BZ040511 | BZ040511 | BZ040511 | X | 828  | 828  | 196 | 189 |
| 3378 | X | 9924881   | 9925203   | CC58488  | CC58488  | CC58488  | X | 852  | 852  | 196 | 176 |
| 3380 | X | 10046999  | 10046272  | BZ01035  | BZ01035  | BZ01035  | X | 859  | 859  | 196 | 189 |
| 3381 | X | 101524529 | 101524863 | CC775603 | CC775603 | CC775603 | X | 866  | 866  | 196 | 176 |
| 3382 | X | 105428038 | 105428196 | CC535354 | CC535354 | CC535354 | X | 889  | 889  | 196 | 176 |
| 3383 | X | 104079724 | 104079817 | BZ01493  | BZ01493  | BZ01493  | X | 904  | 904  | 196 | 176 |
| 3384 | X | 10281587  | 10281513  | X0306    | X0306    | X0306    | X | 918  | 918  | 196 | 176 |
| 3385 | X | 102145352 | 102145830 | CC477330 | CC477330 | CC477330 | X | 935  | 935  | 196 | 176 |
| 3386 | X | 105870059 | 105870542 | CC582591 | CC582591 | CC582591 | X | 982  | 982  | 196 | 176 |
| 3387 | X | 10678824  | 10678807  | CC520217 | CC520217 | CC520217 | X | 991  | 991  | 196 | 176 |
| 3388 | X | 107635869 | 107636038 | CC481236 | CC481236 | CC481236 | X | 1000 | 1000 | 196 | 176 |
| 3389 | X | 10853407  | 10853532  | BZ045492 | BZ045492 | BZ045492 | X | 1000 | 1000 | 196 | 176 |
| 3390 | X | 108711763 | 108711837 | AW04447  | AW04447  | AW04447  | X | 1013 | 1013 | 196 | 176 |
| 3392 | X | 109499336 | 109499493 | BZ06252  | BZ06252  | BZ06252  | X | 1014 | 1014 | 196 | 176 |
| 3393 | X | 110502258 | 110502335 | CC511548 | CC511548 | CC511548 | X | 1014 | 1014 | 196 | 176 |
| 3394 | X | 111499778 | 111500198 | CC576656 | CC576656 | CC576656 | X | 1019 | 1019 | 196 | 176 |
| 3395 | X | 112341688 | 112341821 | CC587934 | CC587934 | CC587934 | X | 1024 | 1024 | 196 | 176 |
| 3396 | X | 11367621  | 11367842  | BZ000268 | BZ000268 | BZ000268 | X | 1029 | 1029 | 196 | 176 |
| 3397 | X | 114707002 | 114707541 | AW062747 | AW062747 | AW062747 | X | 1038 | 1038 | 196 | 176 |
| 3398 | X | 85794533  | 85794703  | BZ09002  | BZ09002  | BZ09002  | X | 1042 | 1042 | 196 | 176 |
| 3399 | X | 84890405  | 84890801  | CC473032 | CC473032 | CC473032 | X | 1047 | 1047 | 196 | 176 |
| 3400 | X | 83300016  | 83300100  | BZ09102  | BZ09102  | BZ09102  | X | 1056 | 1056 | 196 | 176 |
| 3401 | X | 82562307  | 82562301  | BZ08204  | BZ08204  | BZ08204  | X | 1056 | 1056 | 196 | 176 |
| 3402 | X | 81647456  | 81648173  | CC566579 | CC566579 | CC566579 | X | 1060 | 1060 | 196 | 176 |
| 3403 | X | 80425267  | 80426016  | CC555240 | CC555240 | CC555240 | X | 1070 | 1070 | 196 | 176 |
| 3404 | X | 78424172  | 78424361  | CC562874 | CC562874 | CC562874 | X | 1095 | 1095 | 196 | 176 |
| 3405 | X | 77213078  | 77213078  | BZ04904  | BZ04904  | BZ04904  | X | 1095 | 1095 | 196 | 176 |
| 3406 | X | 76568554  | 76569078  | AW289378 | AW289378 | AW289378 | X | 1099 | 1099 | 196 | 176 |
| 3407 | X | 76005744  | 76005919  | CC517219 | CC517219 | CC517219 | X | 1108 | 1108 | 196 | 176 |
| 3408 | X | 74420207  | 74420207  | BZ09507  | BZ09507  | BZ09507  | X | 1112 | 1112 | 196 | 176 |
| 3410 | X | 73537463  | 73537817  | BZ055438 | BZ055438 | BZ055438 | X | 1127 | 1127 | 196 | 176 |
| 3411 | X | 72828595  | 72829222  | CC574702 | CC574702 | CC574702 | X | 1144 | 1144 | 196 | 176 |
| 3412 | X | 71541396  | 71541719  | CC586657 | CC586657 | CC586657 | X | 1156 | 1156 | 196 | 176 |
| 3413 | X | 69667776  | 69667840  | BZ047684 | BZ047684 | BZ047684 | X | 1174 | 1174 | 196 | 176 |
| 3414 | X | 71049399  | 71049697  | CC567042 | CC567042 | CC567042 | X | 1178 | 1178 | 196 | 176 |
| 3415 | X | 68749607  | 68749227  | BZ032308 | BZ032308 | BZ032308 | X | 1188 | 1188 | 196 | 176 |
| 3416 | X | 67706418  | 67706502  | CC513396 | CC513396 | CC513396 | X | 1193 | 1193 | 196 | 176 |
| 3417 | X | 66714475  | 66714583  | CC566852 | CC566852 | CC566852 | X | 1198 | 1198 | 196 | 176 |
| 3418 | X | 65886117  | 65886215  | BZ064547 | BZ064547 | BZ064547 | X | 1203 | 1203 | 196 | 176 |
| 3419 | X | 51140058  | 51140188  | BZ055438 | BZ055438 | BZ055438 | X | 1213 | 1213 | 196 | 176 |
| 3420 | X | 50381277  | 50381706  | CC560237 | CC560237 | CC560237 | X | 1213 | 1213 | 196 | 176 |
| 3421 | X | 49386982  | 49387133  | BZ073598 | BZ073598 | BZ073598 | X | 1218 | 1218 | 196 | 176 |
| 3422 | X | 4856444   | 4856528   | CC586477 | CC586477 | CC586477 | X | 1218 | 1218 | 196 | 176 |
| 3424 | X | 47529683  | 47529960  | BZ05125  | BZ05125  | BZ05125  | X | 1223 | 1223 | 196 | 176 |
| 3425 | X | 46696704  | 46696992  | CC501756 | CC501756 | CC501756 | X | 1223 | 1223 | 196 | 176 |
| 3426 | X | 64732669  | 64733054  | CC517135 | CC517135 | CC517135 | X | 1266 | 1266 | 196 | 176 |
| 3427 | X | 63197733  | 63197896  | BZ069185 | BZ069185 | BZ069185 | X | 1270 | 1270 | 196 | 176 |
| 3428 | X | 52906744  | 52906890  | BZ069950 | BZ069950 | BZ069950 | X | 1300 | 1300 | 196 | 176 |
| 3429 | X | 53852382  | 53853504  | BZ011301 | BZ011301 | BZ011301 | X | 1318 | 1318 | 196 | 176 |
| 3430 | X | 54872808  | 54872879  | BZ031748 | BZ031748 | BZ031748 | X | 1336 | 1336 | 196 | 176 |
| 3431 | X | 57820502  | 57820698  | BZ091254 | BZ091254 | BZ091254 | X | 1350 | 1350 | 196 | 176 |
| 3432 | X | 45651865  | 45652076  | CC565070 | CC565070 | CC565070 | X | 1366 | 1366 | 196 | 176 |
| 3433 | X | 44626494  | 44626558  | BZ028347 | BZ028347 | BZ028347 | X | 1366 | 1366 | 196 | 176 |
| 3434 | X | 43511522  | 43511750  | CC595137 | CC595137 | CC595137 | X | 1380 | 1380 | 196 | 176 |
| 3435 | X | 43361976  | 43362313  | AW267052 | AW267052 | AW267052 | X | 1380 | 1380 | 196 | 176 |
| 3436 | X | 41652009  | 41652259  | BZ078158 | BZ078158 | BZ078158 | X | 1389 | 1389 | 196 | 176 |
| 3437 | X | 42671917  | 42672728  | BZ064069 | BZ064069 | BZ064069 | X | 1389 | 1389 | 196 | 176 |
| 3438 | X | 40631696  | 40631798  | BZ040484 | BZ040484 | BZ040484 | X | 1393 | 1393 | 196 | 176 |
| 3439 | X | 39669326  | 39669556  | BZ07544  | BZ07544  | BZ07544  | X | 1398 | 1398 | 196 | 176 |
| 3440 | X | 38575761  | 38576101  | CC764303 | CC764303 | CC764303 | X | 1403 | 1403 | 196 | 176 |
| 3442 | X | 37815229  | 37815457  | BZ019820 | BZ019820 | BZ019820 | X | 1413 | 1413 | 196 | 176 |
| 3443 | X | 37419345  | 37419605  | AF036097 | AF036097 | AF036097 | X | 1413 | 1413 | 196 | 176 |
| 3444 | X | 34749663  | 34749481  | CC517355 | CC517355 | CC517355 | X | 1413 | 1413 | 196 | 176 |
| 3445 | X | 36304090  | 36304195  | BZ031005 | BZ031005 | BZ031005 | X | 1418 | 1418 | 196 | 176 |
| 3446 | X | 35266328  | 35266783  | CC585642 | CC585642 | CC585642 | X | 1418 | 1418 | 196 | 176 |
| 3447 | X | 33799479  | 33791072  | CC560121 | CC560121 | CC560121 | X | 1418 | 1418 | 196 | 176 |
| 3448 | X | 32723046  | 32723054  | CC577844 | CC577844 | CC577844 | X | 1418 | 1418 | 196 | 176 |
| 3449 | X | 32142782  | 32142949  | CC518632 | CC518632 | CC518632 | X | 1418 | 1418 | 196 | 176 |
| 3450 | X | 30960417  | 30960732  | CC765676 | CC765676 | CC765676 | X | 1418 | 1418 | 196 | 176 |
| 3453 | X | 30014029  | 30014441  | BZ051619 | BZ051619 | BZ051619 | X | 1438 | 1438 | 196 | 176 |
| 3454 | X | 29888512  | 29888574  | CC529463 | CC529463 | CC529463 | X | 1443 | 1443 | 196 | 176 |
| 3455 | X | 27721904  | 27722244  | CC498328 | CC498328 | CC498328 | X | 0    | 0    | 196 | 180 |
| 3456 | X | 26461406  | 26461710  | CC565587 | CC565587 | CC565587 | X | 14   | 14   | 196 | 180 |
| 3457 | X | 25403688  | 25403849  | CC567328 | CC567328 | CC567328 | X | 34   | 34   | 196 | 180 |
| 3458 | X | 25612657  | 25612560  | BZ091621 | BZ091621 | BZ091621 | X | 34   | 34   | 196 | 180 |
| 3459 | X | 23458827  | 23457077  | CC485137 | CC485137 | CC485137 | X | 40   | 40   | 196 | 180 |
| 3460 | X | 22510723  | 22510869  | BZ087399 | BZ087399 | BZ087399 | X | 45   | 45   | 196 | 180 |
| 3461 | X | 21653195  | 21653562  | CC773473 | CC773473 | CC773473 | X | 45   | 45   | 196 | 180 |
| 3462 | X | 20904201  | 20904627  | BZ08280  | BZ08280  | BZ08280  | X | 45   | 45   | 196 | 180 |
| 3463 | X | 20019679  | 20019907  | CC475753 | CC475753 | CC475753 | X | 63   | 63   | 196 | 180 |
| 3464 | X | 19932781  | 19932999  | AW465031 | AW465031 | AW465031 | X | 63   | 63   | 196 | 180 |
| 3465 | X | 19430055  | 19430302  | CC519438 | CC519438 | CC519438 | X | 63   | 63   | 196 | 180 |
| 3466 | X | 18055211  | 18055889  | AW314533 | AW314533 | AW314533 | X | 76   | 76   | 196 | 180 |
| 3467 | X | 1762196   | 17622481  | BZ098515 | BZ098515 | BZ098515 | X | 76   | 76   | 196 | 180 |
| 3468 | X | 16831858  | 16832448  | CC472579 | CC472579 | CC472579 | X | 83   | 83   | 196 | 180 |
| 3469 | X | 15918827  | 15919392  | CC564485 | CC564485 | CC564485 | X | 83   | 83   | 196 | 180 |
| 3471 | X | 14776605  | 14776605  | CC541823 | CC541823 | CC541823 | X | 90   | 90   | 196 | 180 |
| 3472 | X | 13744621  | 13744789  | BZ053371 | BZ053371 | BZ053371 | X | 97   | 97   | 196 | 180 |
| 3473 | X | 11076319  | 11076751  | M86932   | M86932   | M86932   | X | 0    | 0    | 196 | 180 |
| 3474 | X | 949234    | 9492781   | AW314864 | AW314864 | AW314864 | X | 13   | 13   | 196 | 180 |
| 3475 | X | 8850801   | 8851012   | CC526415 | CC526415 | CC526415 | X | 28   | 28   | 196 | 180 |
| 3476 | X | 8031739   | 8031782   | CC483846 | CC483846 | CC483846 | X | 39   | 39   | 196 | 180 |
| 3478 | X | 7096787   | 7096952   | BZ073986 | BZ073986 | BZ073986 | X | 45   | 45   | 196 | 180 |
| 3479 | X | 6114748   | 6114748   | BZ04391  | BZ04391  | BZ04391  | X | 45   | 45   | 196 | 180 |
| 3482 | X | 3254325   | 3254426   | BZ018292 | BZ018292 | BZ018292 | X | 74   | 74   | 196 | 180 |
| 3483 | X | 1615459   | 1615603   | AW656774 | AW656774 | AW656774 | X | 94   | 94   | 196 | 180 |
| 3484 | X | 1551960   | 1552450   | M24103   | M24103   | M24103   | X | 100  | 100  | 196 | 180 |

AG here

Inversion missed by AG

3 > 1

AG here

AG is wrong in merging these two blocks, as other blocks comes in between

2 > 1

**Table 2.** Discrepancies in HSB definitions between SyntenyTracker and AutoGRAPH using cattle-human RH comparative map.

| Comparison                                                                              | Number of cases |
|-----------------------------------------------------------------------------------------|-----------------|
| Reasons for HSBs defined by SyntenyTracker<br>being joined by AutoGRAPH                 |                 |
| Sub-blocks on other reference chromosomes                                               | 10              |
| Inversion missed by AutoGRAPH                                                           | 2               |
| Reasons for HSBs defined by SyntenyTracker<br>being broken by AutoGRAPH into >1 HSB     |                 |
| Presence of singletons                                                                  | 2               |
| Out-of-place markers were called HSBs by AutoGRAPH                                      | 1               |
| Deletion of markers by AutoGRAPH resulted in losing<br>of HSB defined by SyntenyTracker | 4               |
